# Supplementary material for: Stereoselective hydroacylation of bicyclic alkenes with 2-hydroxybenzaldehydes catalyzed by hydroxoiridium/diene complexes
Source: Royal Society of Chemistry journal article supplement (doi:10.1039/c5cc05432j), 2015-01-01
Supplement: c5cc05432j1.pdf [file c5cc05432j1.pdf]

## Supplementary Information

### Stereoselective hydroacylation of bicyclic alkenes with 2-hydroxybenzaldehydes catalyzed by hydroxoiridium/diene complexes

Midori Nagamoto and Takahiro Nishimura\*

*Department of Chemistry, Graduate School of Science, Kyoto University, Sakyo, Kyoto 606-8502, Japan. Fax: +81 75 753 3988; Tel: +81 75 753 3987; E-mail: tnishi@kuchem.kyoto-u.ac.jp*

#### Contents of Supplementary Information:

|                                                                           |             |
|---------------------------------------------------------------------------|-------------|
| 1. General                                                                | S-2         |
| 2. Materials                                                              | S-2         |
| 3. Preparation of salicylaldehydes <b>1</b> and bicyclic alkenes <b>2</b> | S-2         |
| 4. General procedure for Table 1                                          | S-2 — S-3   |
| 5. General procedure for Scheme 1                                         | S-3         |
| 6. General procedure for Scheme 2                                         | S-3         |
| 7. Characterization of the products                                       | S-3 — S-12  |
| 8. General procedure for Scheme 3                                         | S-12        |
| 9. Data for Scheme 3                                                      | S-13 — S-14 |
| 10. Condition screening of the asymmetric hydroacylation                  | S-14 — S-15 |
| 11. Transformation of <b>3li</b> into <b>4</b>                            | S-15 — S-16 |
| 12. X-Ray data of <b>4</b>                                                | S-16 — S-17 |
| 13. <sup>1</sup> H and <sup>13</sup> C NMR spectra                        | S-18 — S-45 |
| 14. Chiral HPLC charts                                                    | S-46 — S-52 |

## 1. General

All anaerobic and moisture-sensitive manipulations were carried out with standard Schlenk techniques under predried nitrogen. NMR spectra were recorded on a JEOL JNM ECA-600 spectrometer (600 MHz for  $^1\text{H}$ , 150 MHz for  $^{13}\text{C}$ ). Chemical shifts are reported in  $\delta$  (ppm) referenced to the residual peak of  $\text{CDCl}_3$  ( $\delta$  7.26) for  $^1\text{H}$  NMR, and  $\text{CDCl}_3$  ( $\delta$  77.00) for  $^{13}\text{C}$  NMR. The following abbreviations are used; s, singlet; d, doublet; t, triplet; m, multiplet; br, broad. High-resolution mass spectra (ESI-TOF) were obtained with a Bruker micrOTOF spectrometer. Flash column chromatography was performed with Silica Gel 60 N (spherical, neutral, Cica-Reagent). Preparative thin-layer chromatography was performed with Silica Gel 60 PF<sub>254</sub> (Merck).

## 2. Materials

Toluene was purified by passing through a neutral alumina column under  $\text{N}_2$ . Iridium complexes  $[\text{Ir}(\text{OH})(\text{cod})]_2$ <sup>1</sup> and  $[\text{IrCl}((S,S)\text{-Me-tfb}^*)]_2$ <sup>2</sup> were prepared according to the reported procedures.

## 3. Preparation of salicylaldehydes **1** and bicyclic alkenes **2**

Salicylaldehydes **1k** and **1n** were prepared according to the reported procedures.<sup>3</sup> Bicyclic alkenes **1a** (CAS: 573-57-9),<sup>4</sup> **1b** (CAS: 26002-73-3),<sup>4</sup> **1c** (CAS: 19061-36-0),<sup>4</sup> **1d** (CAS: 111211-88-2),<sup>5</sup> **1e** (CAS: 96691-93-9),<sup>6</sup> **1f** (CAS: 573-57-9),<sup>7</sup> **1g** (CAS: 4453-90-1),<sup>8</sup> **1h** (CAS: 7350-72-3),<sup>9</sup> **1j** (CAS: 129-64-6),<sup>10</sup> **1k** (CAS: 75715-21-8),<sup>11</sup> **1l** (CAS: 15971-63-8),<sup>12</sup> **1n** (CAS: 4705-93-5),<sup>13</sup> and **1o** (CAS: 19396-42-0)<sup>14</sup> were prepared according to the reported procedures. Other materials were purchased from commercial suppliers and used as received.

## 4. General procedure for iridium-catalyzed addition of salicylaldehyde (**1a**) to oxabenzonorbornadiene **2a** (Table 1)

$[\text{Ir}(\text{OH})(\text{cod})]_2$  (1.6 mg, 0.0050 mmol of Ir, 5 mol% of Ir) and **2a** (17.3 mg, 0.12 mmol)

- 
- 1 L. M. Green and D. W. Meeck, *Organometallics*, 1989, **8**, 659.
  - 2 T. Nishimura, Y. Yasuhara, T. Sawano and T. Hayashi, *J. Am. Chem. Soc.*, 2010, **132**, 7872.
  - 3 (a) H. Gybäck, J. Malmstöm and T. E. Gitte, Patent WO2012/87229 A1, 2012; (b) K. Mori, Y. Ichikawa, M. Kobayashi, S. Shibata, M. Yamanaka and T. Akiyama, *J. Am. Chem. Soc.*, 2013, **135**, 3964.
  - 4 R. Luo, J. Liao, L. Xie, W. Tang and A. S. C. Chan, *Chem. Commun.*, 2013, **49**, 9959.
  - 5 J. T. Manka, A. G. Douglass, P. Kaszynski and A. C. Friedli, *J. Org. Chem.*, 2000, **65**, 5202.
  - 6 M. Lautens, J. T. Colucci, S. Hiebert, N. D. Smith and G. Bouchain, *Org. Lett.*, 2002, **4**, 1879.
  - 7 M. Davoust, J. A. Kitching, M. J. Fleming and M. Lautens, *Chem. Eur. J.*, 2010, **16**, 50.
  - 8 B.-Y. Wang, D. A. Turner, T. Zujovic, C. M. Hadad and J. D. Badjic, *Chem. Eur. J.*, 2011, **17**, 8870.
  - 9 S. S. Bhojgude, T. Kaicharla, A. Bhunia and A. T. Biju, *Org. Lett.*, 2012, **14**, 4098.
  - 10 D. Birney, T. K. Lim, J. H. P. Koh, B. R. Pool and J. M. White, *J. Am. Chem. Soc.*, 2002, **124**, 5091.
  - 11 A. Gómez-SanJuan, N. Sotomayor and E. Lete, *Eur. J. Org. Chem.*, 2013, 6722.
  - 12 J. A. Moore, R. Muth and R. Sorace, *J. Org. Chem.*, 1974, **39**, 3799.
  - 13 M. S. Newman, H. M. Dali and W. M. Hung, *J. Org. Chem.*, 1975, **40**, 262.
  - 14 J. Haner, K. Jack, M. L. Menard, J. Howell, J. Nagireddy, M. A. Raheem and W. Tam, *Synthesis*, 2012, **44**, 2713.

were placed in a Schlenk tube under N<sub>2</sub>. 1,4-Dioxane (0.4 mL) and salicylaldehyde (**1a**: 12.2 mg, 0.10 mmol) were added successively. The Schlenk tube was capped with a glass stopper and heated at 60 °C for 6 h with stirring. The mixture was concentrated on a rotary evaporator. The yields of the products were determined by <sup>1</sup>H NMR using 1,4-dimethoxybenzene as an internal standard. For entries 3–7 of Table 1, [IrCl(cod)]<sub>2</sub> (1.7 mg, 0.0050 mmol of Ir, 5 mol% of Ir) and base (0.10 mmol, 10 mol%) were used instead of [Ir(OH)(cod)]<sub>2</sub>.

## 5. General procedure for iridium-catalyzed addition of salicylaldehyde (**1a**) to bicyclic alkenes **2** (Scheme 1)

[Ir(OH)(cod)]<sub>2</sub> (3.2 mg, 0.010 mmol of Ir, 5 mol% of Ir) and bicyclic alkene **2** (for solid materials, 0.24 mmol) were placed in a Schlenk tube under N<sub>2</sub>. 1,4-Dioxane (0.8 mL) and salicylaldehyde (**1a**: 24.4 mg, 0.20 mmol) were added successively (liquid bicyclic alkene **2** was added at this time). The Schlenk tube was capped with a glass stopper and heated at 60 °C for 6 h with stirring. The mixture was concentrated on a rotary evaporator, and the residue was subjected to preparative TLC on silica gel with EtOAc/hexane to give **3**. For bicyclic alkenes **2j** and **2k**, the reaction of **1a** (0.24 mmol) with **2j** or **2k** (0.20 mmol) was conducted for an ease of isolation of the product.

## 6. General procedure for iridium-catalyzed addition of salicylaldehydes **1** to 2-norbornene (**2i**) (Scheme 2)

[Ir(OH)(cod)]<sub>2</sub> (3.2 mg, 0.010 mmol of Ir, 5 mol% of Ir) and 2-norbornene (**2i**) (0.40 mmol) were placed in a Schlenk tube under N<sub>2</sub>. 1,4-Dioxane (0.8 mL) and salicylaldehyde (**1a**: 24.4 mg, 0.20 mmol) were added successively. The Schlenk tube was capped with a glass stopper and heated at 60 °C for 6 h with stirring. The mixture was concentrated on a rotary evaporator, and the residue was subjected to preparative TLC on silica gel with hexane/EtOAc to give **3**.

## 7. Characterization of the products

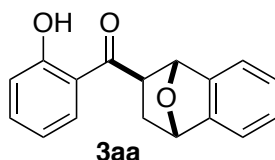

**Compound 3aa** (Scheme 1, 52.0 mg, 97% yield, CAS: 1028939-89-0). A solution of hexane/EtOAc (5:1) was used for preparative TLC on silica gel. <sup>1</sup>H NMR (CDCl<sub>3</sub>) δ 1.94 (dd, *J* = 11.6, 8.9 Hz, 1H), 2.50 (dt, *J* = 11.6, 4.8 Hz, 1H), 3.48 (dd, *J* = 8.9, 4.8 Hz, 1H), 5.53 (d, *J* = 4.8 Hz, 1H), 5.71 (s, 1H), 6.89 (t, *J* = 8.1 Hz, 1H), 7.03 (d, *J* = 8.1 Hz, 1H), 7.21–7.26 (m, 2H), 7.30–7.39

(m, 2H), 7.49 (td,  $J = 8.1, 1.4$  Hz, 1H), 7.64 (dd,  $J = 8.1, 1.4$  Hz, 1H), 12.29 (s, 1H).

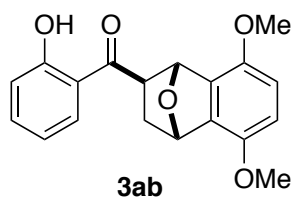

**Compound 3ab** (Scheme 1, 63.5 mg, 97% yield). A solution of  $\text{CHCl}_3/\text{EtOAc}$  (10:1) was used for preparative TLC on silica gel.  $^1\text{H NMR}$  ( $\text{CDCl}_3$ )  $\delta$  1.88 (dd,  $J = 11.6, 8.9$  Hz, 1H), 2.55 (dt,  $J = 11.6, 4.8$  Hz, 1H), 3.49 (dd,  $J = 8.9, 4.8$  Hz, 1H), 3.82 (s, 3H), 3.85 (s, 3H), 5.69 (d,  $J = 4.8$  Hz, 1H), 5.84 (s, 1H), 6.71 (s, 2H), 6.90 (td,  $J = 8.2, 1.4$  Hz, 1H), 7.03 (dd,  $J = 8.2, 1.4$  Hz, 1H), 7.48 (td,  $J = 8.2, 1.4$  Hz, 1H), 7.77 (d,  $J = 8.2, 1.4$  Hz, 1H), 12.30 (s, 1H);  $^{13}\text{C NMR}$  ( $\text{CDCl}_3$ )  $\delta$  31.6, 47.7, 56.0, 56.1, 77.2, 79.3, 111.1, 111.6, 118.7, 118.8, 118.9, 130.0, 133.6, 135.1, 136.3, 146.4, 146.8, 162.9, 204.8. HRMS (ESI) calcd for  $\text{C}_{19}\text{H}_{18}\text{NaO}_5$  ( $\text{M}+\text{Na}$ ) $^+$  349.1046, found 349.1043.

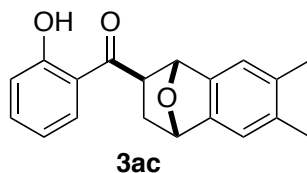

**Compound 3ac** (Scheme 1, 52.5 mg, 93% yield).  $\text{CH}_2\text{Cl}_2$  was used for preparative TLC on silica gel.  $^1\text{H NMR}$  ( $\text{CDCl}_3$ )  $\delta$  1.88 (dd,  $J = 11.6, 8.9$  Hz, 1H), 2.28 (s, 3H), 2.29 (s, 3H), 2.48 (dt,  $J = 11.6, 4.8$  Hz, 1H), 3.45 (dd,  $J = 8.9, 4.8$  Hz, 1H), 5.53 (d,  $J = 4.8$  Hz, 1H), 5.63 (s, 1H), 6.89 (t,  $J = 7.5$  Hz, 1H), 7.03 (d,  $J = 7.5$  Hz, 1H), 7.10 (s, 1H), 7.14 (s, 1H), 7.48 (t,  $J = 7.5$  Hz, 1H), 7.64 (d,  $J = 7.5$  Hz, 1H), 12.31 (s, 1H);  $^{13}\text{C NMR}$  ( $\text{CDCl}_3$ )  $\delta$  20.0, 33.1, 48.3, 79.0, 80.8, 118.7, 118.9, 120.2, 120.7, 129.7, 135.1, 135.3, 136.3, 142.3, 143.9, 163.0, 205.3. HRMS (ESI) calcd for  $\text{C}_{19}\text{H}_{18}\text{NaO}_3$  ( $\text{M}+\text{Na}$ ) $^+$  317.1148, found 317.1144.

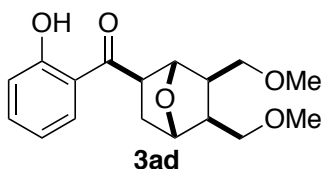

**Compound 3ad** (Scheme 1, 53.8 mg, 91% yield). A solution of hexane/ $\text{EtOAc}$  (1:1) was used for preparative TLC on silica gel.  $^1\text{H NMR}$  ( $\text{CDCl}_3$ )  $\delta$  1.86 (dd,  $J = 12.2, 9.6$  Hz, 1H), 2.23–2.30 (m, 2H), 2.30–2.36 (m, 1H), 3.22–3.29 (m, 2H), 3.32 (s, 3H), 3.33 (s, 3H), 3.34–3.36 (m, 1H), 3.38 (dt,  $J = 8.9, 4.8$  Hz, 1H), 3.52 (dd,  $J = 8.9, 4.8$  Hz, 1H), 4.54 (d,  $J = 4.8$  Hz, 1H), 4.75 (s, 1H), 6.90 (t,  $J = 7.7$  Hz, 1H), 6.98 (d,  $J = 7.7$  Hz, 1H), 7.45 (t,  $J = 7.7$  Hz, 1H), 7.67 (d,  $J = 7.7$  Hz, 1H), 12.25 (s, 1H);  $^{13}\text{C NMR}$  ( $\text{CDCl}_3$ )  $\delta$  33.7, 45.8, 46.0, 49.7, 58.78, 58.81, 70.5, 70.8, 79.0, 81.2, 118.3,



118.7, 118.9, 129.7, 136.1, 163.1, 204.3. HRMS (ESI) calcd for  $C_{17}H_{22}NaO_5$  ( $M+Na$ )<sup>+</sup> 329.1356, found 329.1352.

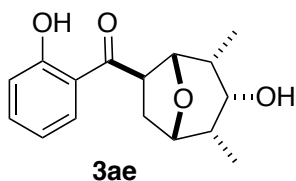

**Compound 3ae** (Scheme 1, 52.5 mg, 95% yield). A solution of  $CHCl_3/EtOAc$  (7:1) was used for preparative TLC on silica gel.  $^1H$  NMR ( $CDCl_3$ )  $\delta$  1.01 (d,  $J = 7.5$  Hz, 3H), 1.06 (d,  $J = 7.5$  Hz, 3H), 1.56 (br s, 1H), 1.96–2.03 (m, 1H), 2.08–2.22 (m, 2H), 2.69 (dd,  $J = 12.2, 9.5$  Hz, 1H), 3.79 (s, 1H), 4.15–4.20 (m, 1H), 4.38 (dd,  $J = 9.5, 4.8$  Hz, 1H), 4.46 (s, 1H), 6.90 (t,  $J = 8.2$  Hz, 1H), 6.98 (d,  $J = 8.2$  Hz, 1H), 7.46 (t,  $J = 8.2$  Hz, 1H), 7.82 (d,  $J = 8.2$  Hz, 1H), 12.36 (s, 1H);  $^{13}C$  NMR ( $CDCl_3$ )  $\delta$  12.9, 13.3, 31.4, 38.7, 38.9, 45.5, 71.7, 78.7, 78.9, 118.3, 118.6, 188.7, 130.3, 136.1, 163.1, 207.0. HRMS (ESI) calcd for  $C_{16}H_{20}NaO_4$  ( $M+Na$ )<sup>+</sup> 299.1254, found 299.1249.

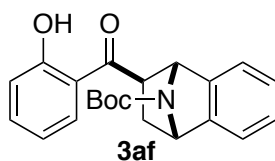

**Compound 3af** (Scheme 1, 68.2 mg, 95% yield).  $CHCl_3$  was used for preparative TLC on silica gel.  $^1H$  NMR ( $CDCl_3$ )  $\delta$  1.34 (s, 9H), 1.64–1.72 (m, 1H), 2.78–2.85 (m, 1H), 3.44 (s, 1H), 5.37 (br s, 2H), 6.94 (br t,  $J = 8.2$  Hz, 1H), 7.03 (d,  $J = 8.2$  Hz, 1H), 7.19–7.24 (m, 2H), 7.28–7.43 (m, 2H), 7.50 (br t,  $J = 8.2$  Hz, 1H), 7.70 (br d,  $J = 8.2$  Hz, 1H), 12.31 (br s, 1H);  $^{13}C$  NMR ( $CDCl_3$ , 50 °C)  $\delta$  28.1, 30.9 (br), 49.3 (br), 60.9 (br), 64.4, 80.5, 118.8, 118.9, 119.0, 119.3 (br), 120.0, 126.7, 127.1, 129.4, 136.2, 144.5, 145.8, 153.8 (br), 163.1, 204.0. HRMS (ESI) calcd for  $C_{22}H_{23}NNaO_4$  ( $M+Na$ )<sup>+</sup> 388.1519, found 388.1516.

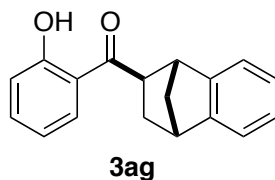

**Compound 3ag** (Scheme 1, 49.2 mg, 92% yield). A solution of hexane/ $EtOAc$  (5:1) was used for preparative TLC on silica gel.  $^1H$  NMR ( $CDCl_3$ )  $\delta$  1.71 (ddd,  $J = 11.5, 9.5, 2.7$  Hz, 1H), 1.83 (d,  $J = 9.5$  Hz, 1H), 1.92 (d,  $J = 9.5$  Hz, 1H), 2.32 (ddd,  $J = 11.5, 5.5, 4.1$  Hz, 1H), 3.29 (dd,  $J = 9.5, 5.5$  Hz, 1H), 3.48 (d,  $J = 2.7$  Hz, 1H), 3.64 (s, 1H), 6.82 (t,  $J = 8.2$  Hz, 1H), 7.02 (d,  $J = 8.2$  Hz, 1H), 7.12–7.18 (m, 2H), 7.24–7.32 (m, 2H), 7.47 (td,  $J = 8.2, 1.3$  Hz, 1H), 7.71 (dd,  $J = 8.2, 1.3$

Hz, 1H), 12.46 (s, 1H);  $^{13}\text{C}$  NMR ( $\text{CDCl}_3$ )  $\delta$  33.2, 43.8, 47.3, 47.7, 47.8, 118.6, 118.85, 118.94, 120.7, 121.1, 125.9, 126.3, 130.0, 136.1, 147.1, 148.6, 162.8, 208.1. HRMS (ESI) calcd for  $\text{C}_{18}\text{H}_{16}\text{NaO}_2$  ( $\text{M}+\text{Na}$ ) $^+$  287.1043, found 287.1036.

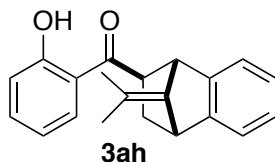

**Compound 3ah** (Scheme 1, 57.7 mg, 95% yield). A solution of hexane/EtOAc (7:1) was used for preparative TLC on silica gel.  $^1\text{H}$  NMR ( $\text{CDCl}_3$ )  $\delta$  1.660 (s, 3H), 1.665 (s, 3H), 1.80 (dd,  $J = 11.5, 9.5$  Hz, 1H), 2.28 (ddd,  $J = 11.5, 5.1, 3.8$  Hz, 1H), 3.33 (dd,  $J = 9.5, 5.1$  Hz, 1H), 3.91 (d,  $J = 3.8$  Hz, 1H), 4.12 (s, 1H), 6.89 (td,  $J = 8.2, 1.4$  Hz, 1H), 7.01 (dd,  $J = 8.2, 1.4$  Hz, 1H), 7.12–7.17 (m, 2H), 7.23–7.31 (m, 2H), 7.46 (td,  $J = 8.2, 1.4$  Hz, 1H), 7.69 (dd,  $J = 8.2, 1.4$  Hz, 1H), 12.43 (s, 1H);  $^{13}\text{C}$  NMR ( $\text{CDCl}_3$ )  $\delta$  20.0, 20.1, 33.1, 44.2, 47.4, 48.4, 114.5, 118.6, 118.78, 118.82, 120.2, 120.4, 125.8, 126.2, 129.9, 135.9, 145.2, 146.5, 147.9, 162.7, 206.8. HRMS (ESI) calcd for  $\text{C}_{21}\text{H}_{20}\text{NaO}_2$  ( $\text{M}+\text{Na}$ ) $^+$  327.1356, found 327.1352.

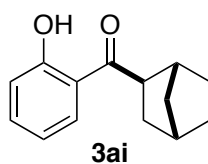

**Compound 3ai** (CAS: 220459-44-9, Scheme 2, 428.6 mg, 99% yield obtained in the reaction of 2.0 mmol of **1a**). A solution of hexane/EtOAc (5:1) was used for preparative TLC on silica gel.  $^1\text{H}$  NMR ( $\text{CDCl}_3$ )  $\delta$  1.19 (d,  $J = 10.2$  Hz, 1H), 1.29–1.34 (m, 1H), 1.40–1.69 (m, 5H), 2.00–2.07 (m, 1H), 2.37 (s, 1H), 2.55 (s, 1H), 3.25 (dd,  $J = 9.2, 5.8$  Hz, 1H), 6.89 (t,  $J = 8.2$  Hz, 1H), 6.97 (d,  $J = 8.2$  Hz, 1H), 7.44 (t,  $J = 8.2$  Hz, 1H), 7.78 (d,  $J = 8.2$  Hz, 1H), 12.49 (s, 1H).

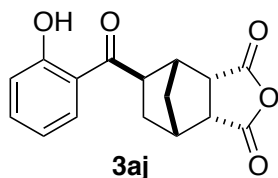

**Compound 3aj** (Scheme 1, 56.0 mg, 98% yield). A solution of  $\text{CH}_2\text{Cl}_2/\text{AcOH}$  (100:1) was used for column chromatography on silica gel.  $^1\text{H}$  NMR ( $\text{CDCl}_3$ )  $\delta$  1.62 (d,  $J = 10.9$  Hz, 1H), 1.67–1.74 (m, 1H), 1.86 (dd,  $J = 10.9, 1.4$  Hz, 1H), 2.36–2.43 (m, 1H), 2.50–3.00 (m, 1H), 3.10 (d,  $J = 5.5$  Hz, 1H), 3.43–3.48 (m, 1H), 3.49 (ddd,  $J = 10.2, 5.5, 2.0$  Hz, 1H), 3.58 (dd,  $J = 10.2, 5.5$  Hz, 1H), 6.95 (t,  $J = 8.1$  Hz, 1H), 6.99 (d,  $J = 8.1$  Hz, 1H), 7.49 (t,  $J = 8.1$  Hz, 1H), 7.71 (d,  $J = 8.1$  Hz,

1H), 12.07 (s, 1H);  $^{13}\text{C}$  NMR ( $\text{CDCl}_3$ )  $\delta$  28.0, 40.1, 44.1, 44.5, 49.4, 49.5, 117.9, 118.7, 119.4, 129.9, 136.8, 163.1, 171.2, 171.8, 204.1. HRMS (ESI) calcd for  $\text{C}_{16}\text{H}_{14}\text{NaO}_5$  ( $\text{M}+\text{Na}$ ) $^+$  309.0733, found 309.0730.

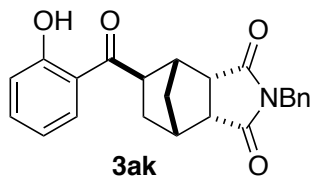

**Compound 3ak** (Scheme 1, 74.6 mg, 99% yield). A solution of hexane/EtOAc (4:1) was used for preparative TLC on silica gel.  $^1\text{H}$  NMR ( $\text{CDCl}_3$ )  $\delta$  1.20–1.28 (m, 1H), 1.55 (d,  $J = 10.6$  Hz, 1H), 1.73 (d,  $J = 10.6$  Hz, 1H), 1.85–1.91 (m, 1H), 2.82 (d,  $J = 4.8$  Hz, 1H), 2.83 (d,  $J = 5.4$  Hz, 1H), 3.01 (d,  $J = 5.5$  Hz, 1H), 3.13 (dd,  $J = 9.5, 4.8$  Hz, 1H), 3.21 (dd,  $J = 9.5, 5.5$  Hz, 1H), 4.65 (d,  $J = 13.6$  Hz, 1H), 4.70 (d,  $J = 13.6$  Hz, 1H), 6.81 (t,  $J = 7.5$  Hz, 1H), 6.91 (d,  $J = 8.2$  Hz, 1H), 7.10 (d,  $J = 8.2$  Hz, 1H), 7.27–7.31 (m, 3H), 7.42 (t,  $J = 7.5$  Hz, 1H), 7.50–7.55 (m, 2H), 12.09 (s, 1H);  $^{13}\text{C}$  NMR ( $\text{CDCl}_3$ )  $\delta$  28.5, 39.3, 40.2, 42.3, 43.2, 43.5, 47.9, 48.1, 117.8, 118.4, 119.1, 128.2, 128.8, 129.4, 130.0, 136.3, 162.9, 177.3, 177.5, 205.3. HRMS (ESI) calcd for  $\text{C}_{23}\text{H}_{21}\text{NNaO}_4$  ( $\text{M}+\text{Na}$ ) $^+$  398.1363, found 398.1365.

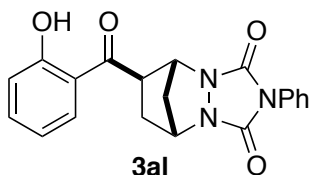

**Compound 3al** (Scheme 1, 73.1 mg, 99% yield). A solution of  $\text{CHCl}_3$ /EtOAc (7:1) was used for preparative TLC on silica gel.  $^1\text{H}$  NMR ( $\text{CDCl}_3$ )  $\delta$  2.03–2.06 (m, 1H), 2.08 (d,  $J = 10.9$  Hz, 1H), 2.32 (ddd,  $J = 13.6, 8.9, 2.0$  Hz, 1H), 2.39 (ddd,  $J = 13.6, 5.5, 2.7$  Hz, 1H), 4.01 (dd,  $J = 8.9, 5.5$  Hz, 1H), 4.77 (s, 1H), 4.90 (s, 1H), 6.99 (t,  $J = 8.1$  Hz, 1H), 7.03 (t,  $J = 8.1$  Hz, 1H), 7.40 (t,  $J = 8.1$  Hz, 1H), 7.47–7.56 (m, 5H), 7.88 (d,  $J = 8.1$  Hz, 1H), 11.96 (s, 1H);  $^{13}\text{C}$  NMR ( $\text{CDCl}_3$ )  $\delta$  32.1, 37.2, 47.3, 60.0, 62.5, 117.9, 119.0, 119.6, 125.3, 128.4, 129.2, 129.9, 131.6, 137.3, 156.8, 156.9, 163.2, 202.7. HRMS (ESI) calcd for  $\text{C}_{20}\text{H}_{17}\text{N}_3\text{NaO}_4$  ( $\text{M}+\text{Na}$ ) $^+$  386.1111, found 386.1107.

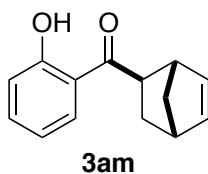

**Compound 3am** (Scheme 1, 37.2 mg, 85% yield) (CAS: 1028939-58-3). A solution of hexane/EtOAc (40:1) was used for preparative TLC on silica gel.  $^1\text{H}$  NMR ( $\text{CDCl}_3$ )  $\delta$  1.44 (d,  $J =$

8.8 Hz, 1H), 1.49–1.58 (m, 2H), 2.02 (ddd,  $J = 11.6, 4.8, 3.4$  Hz, 1H), 2.99 (s, 1H), 3.11 (s, 1H), 3.16 (dd,  $J = 8.8, 4.4$  Hz, 1H), 6.24–6.30 (m, 2H), 7.89 (t,  $J = 8.1$  Hz, 1H), 6.98 (d,  $J = 8.1$  Hz, 1H), 7.45 (td,  $J = 8.1, 1.4$  Hz, 1H), 6.98 (dd,  $J = 8.1, 1.4$  Hz, 1H), 12.48 (s, 1H).

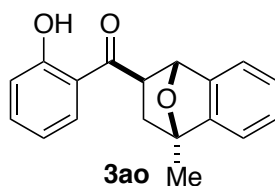

**Compound 3ao** (eq 1, 54.0 mg, 96% yield).  $\text{CH}_2\text{Cl}_2$  was used for preparative TLC on silica gel. The structure of **3ao** was determined by NOE experiments.  $^1\text{H}$  NMR ( $\text{CDCl}_3$ )  $\delta$  1.89 (s, 3H), 1.98 (dd,  $J = 11.6, 8.8$  Hz, 1H), 2.21 (dd,  $J = 11.6, 4.8$  Hz, 1H), 3.54 (dd,  $J = 8.8, 4.8$  Hz, 1H), 5.64 (s, 1H), 6.87 (t,  $J = 8.2$  Hz, 1H), 7.02 (d,  $J = 8.2$  Hz, 1H), 7.20–7.27 (m, 3H), 7.34 (dd,  $J = 7.5, 1.4$  Hz, 1H), 7.47 (td,  $J = 8.2, 1.4$  Hz, 1H), 7.60 (d,  $J = 8.2, 1.4$  Hz, 1H), 12.31 (s, 1H);  $^{13}\text{C}$  NMR ( $\text{CDCl}_3$ )  $\delta$  17.2, 38.6, 50.7, 79.9, 86.0, 118.2, 118.6, 118.86, 118.89, 118.91, 126.8, 127.2, 129.7, 136.3, 145.2, 148.3, 163.0, 205.1. HRMS (ESI) calcd for  $\text{C}_{18}\text{H}_{16}\text{NaO}_3$  ( $\text{M}+\text{Na}$ ) $^+$  303.0992, found 303.0987.

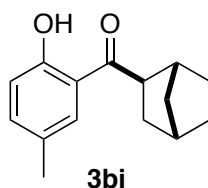

**Compound 3bi** (Scheme 2, 42.7 mg, 93% yield). A solution of hexane/EtOAc (5:1) was used for preparative TLC on silica gel.  $^1\text{H}$  NMR ( $\text{CDCl}_3$ )  $\delta$  1.18 (d,  $J = 10.2$  Hz, 1H), 1.29–1.34 (m, 1H), 1.41–1.46 (m, 2H), 1.49–1.67 (m, 3H), 1.97–2.02 (m, 1H), 2.31 (s, 3H), 2.35 (s, 1H), 2.53 (s, 1H), 3.22 (dd,  $J = 8.2, 5.4$  Hz, 1H), 6.87 (d,  $J = 8.2$  Hz, 1H), 7.25 (dd,  $J = 8.2, 2.0$  Hz, 1H), 7.78 (d,  $J = 2.0$  Hz, 1H), 12.31 (s, 1H);  $^{13}\text{C}$  NMR ( $\text{CDCl}_3$ )  $\delta$  20.7, 28.9, 29.6, 34.1, 36.2, 36.4, 41.3, 49.1, 118.3, 127.7, 129.7, 136.8, 160.9, 207.8. HRMS (ESI) calcd for  $\text{C}_{15}\text{H}_{17}\text{O}_2$  ( $\text{M}-\text{H}$ ) $^-$  229.1234, found 229.1238.

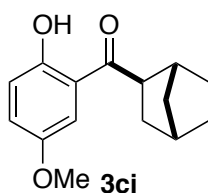

**Compound 3ci** (Scheme 2, 48.9 mg, 99% yield). A solution of hexane/EtOAc (5:1) was used for preparative TLC on silica gel.  $^1\text{H}$  NMR ( $\text{CDCl}_3$ )  $\delta$  1.18 (d,  $J = 10.2$  Hz, 1H), 1.29–1.34 (m, 1H), 1.41–1.46 (m, 1H), 1.49–1.67 (m, 4H), 1.97–2.02 (m, 1H), 2.31 (s, 3H), 2.36 (s, 1H), 2.53

(s, 1H), 3.22 (dd,  $J = 8.8, 5.4$  Hz, 1H), 6.87 (d,  $J = 8.2$  Hz, 1H), 7.25 (dd,  $J = 8.2, 2.0$  Hz, 1H), 7.52 (d,  $J = 2.0$  Hz, 1H), 12.31 (s, 1H);  $^{13}\text{C}$  NMR ( $\text{CDCl}_3$ )  $\delta$  28.9, 29.6, 33.9, 36.2, 36.3, 41.3, 49.3, 56.0, 113.4, 118.2, 119.3, 123.2, 151.5, 157.3, 207.3. HRMS (ESI) calcd for  $\text{C}_{15}\text{H}_{18}\text{NaO}_3$  ( $\text{M}+\text{Na}$ ) $^+$  269.1148, found 269.1150.

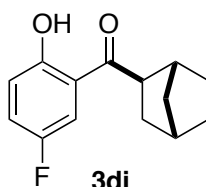

**Compound 3di** (Scheme 2, 46.0 mg, 98% yield). A solution of hexane/EtOAc (5:1) was used for preparative TLC on silica gel.  $^1\text{H}$  NMR ( $\text{CDCl}_3$ )  $\delta$  1.19 (d,  $J = 9.5$  Hz, 1H), 1.29–1.34 (m, 1H), 1.39–1.47 (m, 2H), 1.49–1.68 (m, 3H), 1.98–2.04 (m, 1H), 2.37 (s, 1H), 2.53 (s, 1H), 3.14 (dd,  $J = 8.9, 5.5$  Hz, 1H), 6.93 (dd,  $J = 8.9, 4.8$  Hz, 1H), 7.15–7.21 (m, 1H), 7.41 (dd,  $J = 9.2, 3.1$  Hz, 1H), 12.18 (s, 1H);  $^{13}\text{C}$  NMR ( $\text{CDCl}_3$ )  $\delta$  28.8, 29.6, 33.8, 36.2, 36.3, 41.4, 49.4, 114.9, (d,  $J_{\text{F-C}} = 23$  Hz), 118.2 (d,  $J_{\text{F-C}} = 6$  Hz), 119.8 (d,  $J_{\text{F-C}} = 7$  Hz), 123.4 (d,  $J_{\text{F-C}} = 23$  Hz), 154.7 (d,  $J_{\text{F-C}} = 238$  Hz), 159.1, 207.0. HRMS (ESI) calcd for  $\text{C}_{14}\text{H}_{14}\text{FO}_2$  ( $\text{M}-\text{H}$ ) $^-$  233.0983, found 233.0979.

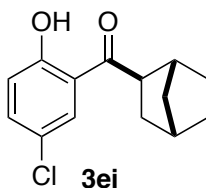

**Compound 3ei** (Scheme 2, 46.1 mg, 92% yield). A solution of hexane/EtOAc (5:1) was used for preparative TLC on silica gel.  $^1\text{H}$  NMR ( $\text{CDCl}_3$ )  $\delta$  1.20 (d,  $J = 10.9$  Hz, 1H), 1.29–1.34 (m, 1H), 1.40–1.46 (m, 2H), 1.50–1.69 (m, 3H), 1.96–2.01 (m, 1H), 2.37 (s, 1H), 2.53 (s, 1H), 3.16 (dd,  $J = 9.2, 5.8$  Hz, 1H), 6.93 (d,  $J = 8.8$  Hz, 1H), 7.38 (dd,  $J = 8.8, 2.7$  Hz, 1H), 7.69 (d,  $J = 2.7$  Hz, 1H), 12.37 (s, 1H);  $^{13}\text{C}$  NMR ( $\text{CDCl}_3$ )  $\delta$  28.9, 29.6, 34.1, 36.2, 36.4, 41.3, 49.3, 119.3, 120.2, 123.4, 129.2, 135.7, 161.5, 207.1. HRMS (ESI) calcd for  $\text{C}_{14}\text{H}_{14}\text{ClO}_2$  ( $\text{M}-\text{H}$ ) $^-$  249.0688, found 249.0685.

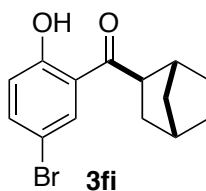

**Compound 3fi** (Scheme 2, 54.3 mg, 92% yield). A solution of hexane/EtOAc (5:1) was used for preparative TLC on silica gel.  $^1\text{H}$  NMR ( $\text{CDCl}_3$ )  $\delta$  1.20 (d,  $J = 9.5$  Hz, 1H), 1.29–1.34 (m, 1H), 1.40–1.46 (m, 2H), 1.50–1.69 (m, 3H), 1.95–2.00 (m, 1H), 2.37 (s, 1H), 2.53 (s, 1H), 3.16 (dd,

$J = 8.8, 5.4$  Hz, 1H), 6.88 (d,  $J = 8.9$  Hz, 1H), 7.51 (dd,  $J = 8.9, 2.4$  Hz, 1H), 7.83 (d,  $J = 2.4$  Hz, 1H), 12.39 (s, 1H);  $^{13}\text{C}$  NMR ( $\text{CDCl}_3$ )  $\delta$  28.8, 29.6, 34.1, 36.2, 36.4, 41.2, 49.3, 110.3, 119.9, 120.6, 132.3, 138.5, 161.9, 207.0. HRMS (ESI) calcd for  $\text{C}_{14}\text{H}_{14}\text{BrO}_2$  ( $\text{M}-\text{H}$ ) $^-$  293.0183, found 293.0177.

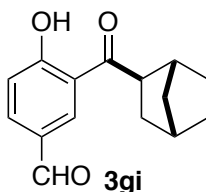

**Compound 3gi** (Scheme 2, 45.6 mg, 93% yield). A solution of hexane/EtOAc (5:1) was used for preparative TLC on silica gel.  $^1\text{H}$  NMR ( $\text{CDCl}_3$ )  $\delta$  1.22 (d,  $J = 10.0$  Hz, 1H), 1.31–1.36 (m, 1H), 1.42–1.45 (m, 2H), 1.57–1.69 (m, 3H), 1.95–2.01 (m, 1H), 2.38 (s, 1H), 2.55 (s, 1H), 3.31 (dd,  $J = 9.1, 6.4$  Hz, 1H), 7.08 (d,  $J = 9.1$  Hz, 1H), 7.96 (d,  $J = 9.1$  Hz, 1H), 8.30 (s, 1H), 9.89 (s, 1H), 13.07 (s, 1H);  $^{13}\text{C}$  NMR ( $\text{CDCl}_3$ )  $\delta$  28.8, 29.6, 34.3, 36.3, 36.5, 41.2, 49.2, 118.4, 119.7, 128.0, 133.0, 136.3, 168.0, 189.8, 208.0. HRMS (ESI) calcd for  $\text{C}_{15}\text{H}_{15}\text{O}_3$  ( $\text{M}-\text{H}$ ) $^-$  243.1027, found 243.1027.

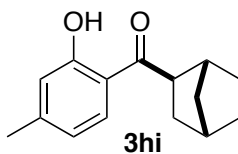

**Compound 3hi** (Scheme 2, 43.4 mg, 94% yield). A solution of hexane/EtOAc (5:1) was used for preparative TLC on silica gel.  $^1\text{H}$  NMR ( $\text{CDCl}_3$ )  $\delta$  1.18 (d,  $J = 10.2$  Hz, 1H), 1.28–1.33 (m, 1H), 1.40–1.46 (m, 2H), 1.50 (ddd,  $J = 10.2, 9.2, 2.8$  Hz, 1H), 1.57–1.67 (m, 2H), 1.99–2.04 (m, 1H), 2.34 (s, 3H), 2.36 (s, 1H), 2.52 (s, 1H), 3.21 (dd,  $J = 8.8, 5.4$  Hz, 1H), 6.69 (d,  $J = 8.2$  Hz, 1H), 6.78 (s, 1H), 7.64 (d,  $J = 8.2$  Hz, 1H), 12.50 (s, 1H);  $^{13}\text{C}$  NMR ( $\text{CDCl}_3$ )  $\delta$  21.8, 28.9, 29.7, 33.9, 36.2, 36.3, 41.5, 49.1, 116.5, 118.6, 119.9, 129.9, 147.3, 163.1, 207.3. HRMS (ESI) calcd for  $\text{C}_{15}\text{H}_{17}\text{O}_2$  ( $\text{M}-\text{H}$ ) $^-$  229.1234, found 229.1238.

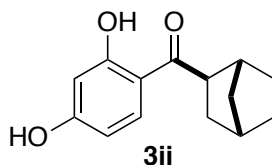

**Compound 3ii** (Scheme 2, 45.3 mg, 97% yield). A solution of hexane/EtOAc (5:1) was used for preparative TLC on silica gel.  $^1\text{H}$  NMR ( $\text{CDCl}_3$ )  $\delta$  1.18 (d,  $J = 9.1$  Hz, 1H), 1.25–1.33 (m, 1H), 1.39–1.53 (m, 3H), 1.56–1.70 (m, 2H), 1.99–2.05 (m, 1H), 2.36 (s, 1H), 2.51 (s, 1H), 3.15 (dd,  $J = 9.1, 5.5$  Hz, 1H), 5.36 (br s, 1H), 6.37 (s, 1H), 6.38 (d,  $J = 9.1$  Hz, 1H), 7.68 (d,  $J = 9.1$  Hz, 1H), 12.90 (s, 1H);  $^{13}\text{C}$  NMR ( $\text{CDCl}_3$ )  $\delta$  28.9, 29.7, 33.9, 36.2, 36.4, 41.5, 48.9, 103.6, 107.5, 113.2,

132.3, 162.0, 165.5, 206.4. HRMS (ESI) calcd for  $C_{14}H_{15}O_3$  ( $M-H$ )<sup>-</sup> 231.1027, found 231.1030.

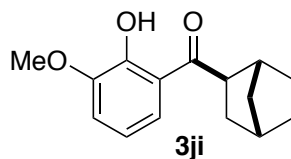

**Compound 3ji** (Scheme 2, 45.8 mg, 93% yield). A solution of hexane/EtOAc (5:1) was used for preparative TLC on silica gel. <sup>1</sup>H NMR (CDCl<sub>3</sub>) δ 1.17 (d, *J* = 10.0 Hz, 1H), 1.27–1.32 (m, 1H), 1.39–1.44 (m, 2H), 1.47–1.53 (m, 1H), 1.55–1.66 (m, 2H), 1.99–2.02 (m, 1H), 2.35 (s, 1H), 2.53 (s, 1H), 3.22 (dd, *J* = 8.6, 5.9 Hz, 1H), 3.89 (s, 3H), 6.81 (t, *J* = 8.2 Hz, 1H), 7.02 (d, *J* = 8.2 Hz, 1H), 7.36 (d, *J* = 8.2 Hz, 1H), 12.80 (s, 1H); <sup>13</sup>C NMR (CDCl<sub>3</sub>) δ 28.9, 29.7, 33.8, 36.2, 36.3, 41.5, 49.6, 56.2, 116.4, 117.9, 118.7, 121.3, 149.1, 153.4, 208.3. HRMS (ESI) calcd for  $C_{15}H_{18}NaO_3$  ( $M+Na$ )<sup>+</sup> 269.1148, found 269.1147.

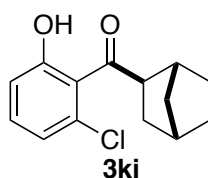

**Compound 3ki** (Scheme 2, 46.4 mg, 92% yield). A solution of hexane/EtOAc (5:1) was used for preparative TLC on silica gel. <sup>1</sup>H NMR (CDCl<sub>3</sub>) δ 1.15 (d, *J* = 10.2 Hz, 1H), 1.23–1.30 (m, 1H), 1.36–1.42 (m, 1H), 1.48–1.62 (m, 4H), 1.99–2.02 (m, 1H), 2.34 (s, 1H), 2.53 (s, 1H), 3.67 (dd, *J* = 8.5, 5.8 Hz, 1H), 6.89 (d, *J* = 8.2 Hz, 1H), 6.94 (d, *J* = 8.2 Hz, 1H), 7.24 (t, *J* = 8.2 Hz, 1H), 11.19 (s, 1H); <sup>13</sup>C NMR (CDCl<sub>3</sub>) δ 28.7, 29.9, 34.2, 36.2, 36.4, 42.3, 53.6, 117.2, 121.1, 122.3, 133.6, 133.7, 162.0, 209.6. HRMS (ESI) calcd for  $C_{14}H_{14}ClO_2$  ( $M-H$ )<sup>-</sup> 249.0688, found 249.0681.

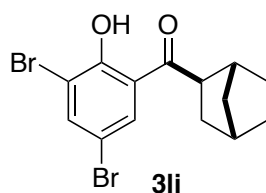

**Compound 3li** (Scheme 2, 72.8 mg, 97% yield). A solution of hexane/EtOAc (5:1) was used for preparative TLC on silica gel. <sup>1</sup>H NMR (CDCl<sub>3</sub>) δ 1.21 (d, *J* = 10.0 Hz, 1H), 1.29–1.34 (m, 1H), 1.39–1.45 (m, 2H), 1.52–1.69 (m, 3H), 1.94–1.99 (m, 1H), 2.38 (s, 1H), 2.53 (s, 1H), 3.16 (dd, *J* = 8.6, 5.9 Hz, 1H), 7.818 (s, 1H), 7.824 (s, 1H), 13.12 (s, 1H); <sup>13</sup>C NMR (CDCl<sub>3</sub>) δ 28.8, 29.5, 34.2, 36.3, 36.4, 41.3, 49.4, 110.2, 113.4, 120.2, 131.6, 140.9, 158.6, 206.8. HRMS (ESI) calcd for  $C_{14}H_{13}Br_2O_2$  ( $M-H$ )<sup>-</sup> 370.9288, found 370.9283.

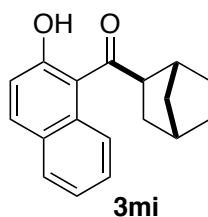

**Compound 3mi** (Scheme 2, 47.4 mg, 89% yield). A solution of hexane/EtOAc (5:1) was used for preparative TLC on silica gel.  $^1\text{H NMR}$  ( $\text{CDCl}_3$ )  $\delta$  1.21–1.30 (m, 1H), 1.32–1.39 (m, 1H), 1.53–1.63 (m, 3H), 1.91 (d,  $J = 10.0$  Hz, 1H), 2.00–2.05 (m, 1H), 2.40 (s, 1H), 2.58 (s, 1H), 3.46 (dd,  $J = 8.2, 5.4$  Hz, 1H), 7.13 (d,  $J = 8.1$  Hz, 1H), 7.37 (t,  $J = 9.1$  Hz, 1H), 7.54 (t,  $J = 9.1$  Hz, 1H), 7.77 (d,  $J = 8.2$  Hz, 1H), 7.84 (d,  $J = 9.1$  Hz, 1H), 8.03 (d,  $J = 9.1$  Hz, 1H), 12.29 (s, 1H);  $^{13}\text{C NMR}$  ( $\text{CDCl}_3$ )  $\delta$  28.5, 29.9, 36.2, 36.3, 36.6, 42.9, 53.3, 115.8, 119.6, 123.7, 124.5, 127.7, 128.6, 129.3, 131.7, 136.2, 161.5, 211.2. HRMS (ESI) calcd for  $\text{C}_{18}\text{H}_{17}\text{O}_2$  ( $\text{M-H}$ ) $^-$  265.1234, found 265.1230.

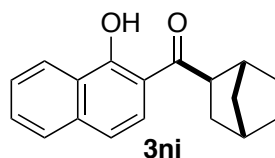

**Compound 3ni** (Scheme 2, 47.1 mg, 88% yield). A solution of hexane/EtOAc (5:1) was used for preparative TLC on silica gel.  $^1\text{H NMR}$  ( $\text{CDCl}_3$ )  $\delta$  1.20 (d,  $J = 10.0$  Hz, 1H), 1.31–1.36 (m, 1H), 1.45–1.70 (m, 5H), 2.07–2.12 (m, 1H), 2.39 (s, 1H), 2.60 (s, 1H), 3.30 (dd,  $J = 8.6, 5.9$  Hz, 1H), 7.25 (d,  $J = 8.1$  Hz, 1H), 7.51 (t,  $J = 8.1$  Hz, 1H), 7.61 (t,  $J = 8.1$  Hz, 1H), 7.69 (d,  $J = 8.1$  Hz, 1H), 7.74 (d,  $J = 8.1$  Hz, 1H), 8.45 (d,  $J = 8.1$  Hz, 1H), 14.20 (s, 1H);  $^{13}\text{C NMR}$  ( $\text{CDCl}_3$ )  $\delta$  29.0, 29.7, 33.7, 36.32, 36.35, 41.5, 49.5, 112.2, 118.0, 124.4, 124.5, 125.5, 125.8, 127.3, 129.8, 137.0, 162.9, 207.7. HRMS (ESI) calcd for  $\text{C}_{18}\text{H}_{17}\text{O}_2$  ( $\text{M-H}$ ) $^-$  265.1234, found 265.1233.

## 8. General procedure for iridium-catalyzed asymmetric hydroacylation of 2-norbornene (**2i**) with 2-hydroxybenzaldehydes **1** (Scheme 3)

$[\text{IrCl}((S,S)\text{-Me-tfb}^*)_2]$  (4.8 mg, 0.010 mmol of Ir, 5 mol% of Ir),  $\text{Na}_2\text{CO}_3$  (2.2 mg, 0.020 mmol), and 2-norbornene (**2i**) (0.40 mmol) were placed in a Schlenk tube under  $\text{N}_2$ . Toluene (0.8 mL) was added and the mixture was stirred at  $0^\circ\text{C}$  for a few minutes. 2-Hydroxybenzaldehydes **1** (0.20 mmol) was added, and the Schlenk tube was capped with a glass stopper and the mixture was stirred at  $10^\circ\text{C}$  for 48 h. The mixture was passed through a short column of silica gel with EtOAc and the solvent was removed on a rotary evaporator. The residue was subjected to preparative TLC on silica gel with hexane/EtOAc to give **3**.



## 9. Data for Scheme 3

The absolute configuration of **3li** was determined to be *1S,2S,4R* by X-ray crystallographic analysis of compound **4**, which was derived from **3li** and TsCl in pyridine (vide infra). For others, they were assigned by analogy with **3li**.

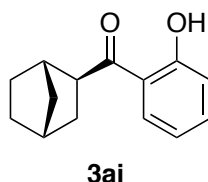

**Compound 3ai** (Scheme 3, 42.0 mg, 97% yield, 86% ee). The ee was measured by HPLC (Chiralcel OD-H column  $\times$  2, hexane/2-propanol = 95:5, flow 0.5 mL/min, 254 nm,  $t_1$  = 19.0 min (major),  $t_2$  = 19.9 min (minor);  $[\alpha]_D^{20}$  +30 ( $c$  0.99,  $\text{CHCl}_3$ ) for 86% ee (*1S,2S,4R*).

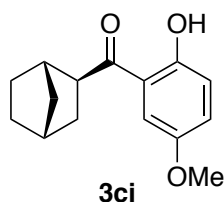

**Compound 3ci** (Scheme 3, 35.0 mg, 71% yield, 82% ee). The ee was measured by HPLC (Chiralpak AD-H column, hexane/2-propanol = 95:5, flow 0.5 mL/min, 254 nm,  $t_1$  = 12.1 min (minor),  $t_2$  = 12.9 min (major);  $[\alpha]_D^{20}$  +19 ( $c$  1.01,  $\text{CHCl}_3$ ) for 82% ee (*1S,2S,4R*).

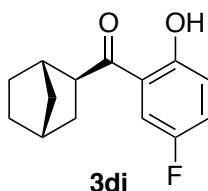

**Compound 3di** (Scheme 3, 44.4 mg, 95% yield, 87% ee). The ee was measured by HPLC (Chiralpak AD-H column, hexane/2-propanol = 95:5, flow 0.5 mL/min, 254 nm,  $t_1$  = 9.0 min (minor),  $t_2$  = 10.0 min (major);  $[\alpha]_D^{20}$  +33 ( $c$  1.00,  $\text{CHCl}_3$ ) for 87% ee (*1S,2S,4R*).

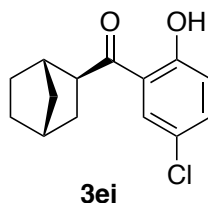

**Compound 3ei** (Scheme 3, 47.3 mg, 94% yield, 88% ee). The ee was measured by HPLC (Chiralpak AD-H column, hexane/2-propanol = 95:5, flow 0.5 mL/min, 254 nm,  $t_1$  = 8.6 min (minor),  $t_2$  = 9.3 min (major);  $[\alpha]_D^{20}$  +22 ( $c$  1.01,  $\text{CHCl}_3$ ) for 88% ee (*1S,2S,4R*).

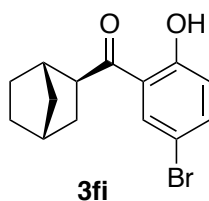

**Compound 3fi** (Scheme 3, 55.6 mg, 94% yield, 87% ee). The ee was measured by HPLC (Chiralpak AD-H column, hexane/2-propanol = 95:5, flow 0.5 mL/min, 254 nm,  $t_1 = 8.8$  min (minor),  $t_2 = 9.3$  min (major);  $[\alpha]_D^{20} +18$  ( $c$  0.98,  $\text{CHCl}_3$ ) for 87% ee (1*S*,2*S*,4*R*).

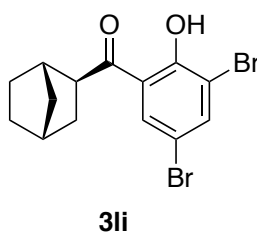

**Compound 3li** (Scheme 3, 63.6 mg, 85% yield, 88% ee). The ee was measured by HPLC (Chiralcel OJ-H column  $\times$  2, hexane/2-propanol = 95:5, flow 0.5 mL/min, 254 nm,  $t_1 = 21.3$  min (minor),  $t_2 = 22.1$  min (major);  $[\alpha]_D^{20} +20$  ( $c$  1.00,  $\text{CHCl}_3$ ) for 88% ee (1*S*,2*S*,4*R*).

## 10. Condition screening of the asymmetric hydroacylation of 2-norbornene (**2i**) with salicylaldehyde (**1a**)

$[\text{IrCl}(\text{R-tfb}^*)]_2$  (0.0050 mmol of Ir, 5 mol% of Ir), base (0.010 mmol), and 2-norbornene (**2i**) (18.8 mg, 0.20 mmol) were placed in a Schlenk tube under  $\text{N}_2$ . Solvent (0.4 mL) and salicylaldehyde (**1a**) (12.2 mg, 0.10 mmol) was added successively, and the Schlenk tube was capped with a glass stopper. The mixture was stirred under the conditions shown in Table S1, and the mixture was passed through a short column of silica gel with EtOAc. The solvent was removed on a rotary evaporator. After an isolation of **3ai** by preparative TLC on silica gel with hexane/EtOAc, the ee was measure by chiral HPLC analysis (Daicel Chiralcel OD-H).

**Table S1. Condition screening**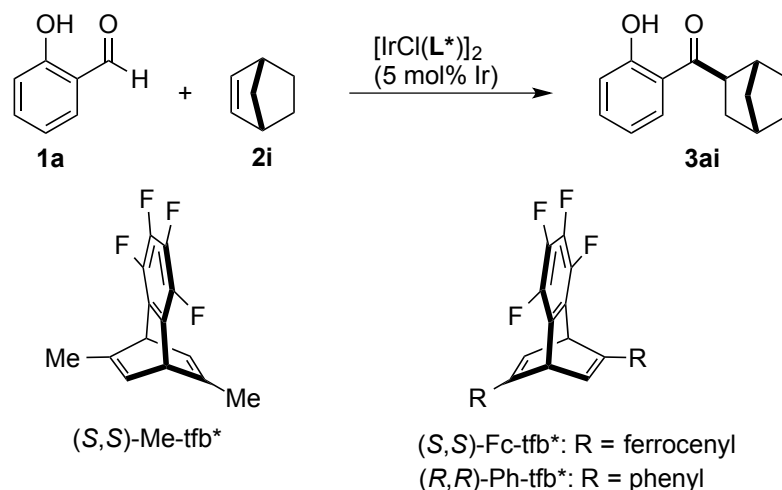

| Entry | Ligand        | Base (mol%)                          | Solvent                         | Conditions  | Yield [%] | Ee [%] |
|-------|---------------|--------------------------------------|---------------------------------|-------------|-----------|--------|
| 1     | (S,S)-Me-tfb* | KOHaq (1 M, 10)                      | 1,4-Dioxane                     | 80 °C, 16 h | 30        | 65     |
| 2     | (S,S)-Fc-tfb* | KOHaq (1 M, 10)                      | 1,4-Dioxane                     | 80 °C, 16 h | 65        | 52     |
| 3     | (R,R)-Ph-tfb* | KOHaq (1 M, 10)                      | 1,4-Dioxane                     | 80 °C, 16 h | 77        | 47     |
| 4     | (S,S)-Me-tfb* | Na <sub>2</sub> CO <sub>3</sub> (10) | 1,4-Dioxane                     | 60 °C, 12 h | 98        | 69     |
| 5     | (S,S)-Me-tfb* | Na <sub>2</sub> CO <sub>3</sub> (10) | 1,4-Dioxane                     | 40 °C, 12 h | 99        | 72     |
| 6     | (S,S)-Me-tfb* | Na <sub>2</sub> CO <sub>3</sub> (10) | 1,4-Dioxane                     | 25 °C, 12 h | 91        | 75     |
| 7     | (S,S)-Me-tfb* | Na <sub>2</sub> CO <sub>3</sub> (10) | Toluene                         | 25 °C, 24 h | 93        | 82     |
| 8     | (S,S)-Me-tfb* | Na <sub>2</sub> CO <sub>3</sub> (10) | CH <sub>2</sub> Cl <sub>2</sub> | 25 °C, 24 h | 92        | 80     |
| 9     | (S,S)-Me-tfb* | Na <sub>2</sub> CO <sub>3</sub> (10) | Toluene                         | 10 °C, 48 h | 97        | 86     |

**11. Transformation of 3li into 4**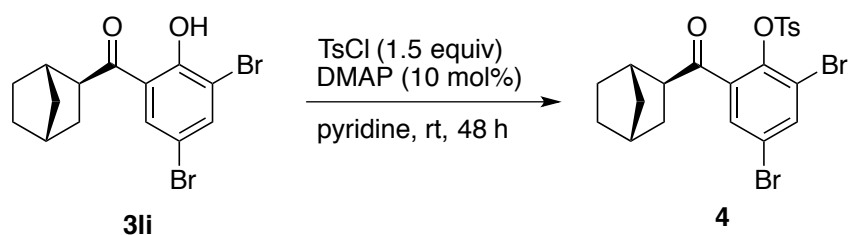

Compound **3li** (37.0 mg, 0.10 mmol, 88% ee), tosyl chloride (28.6 mg, 0.15 mmol), and 4-dimethylaminopyridine (DMAP, 1.2 mg, 0.010 mmol) in pyridine (0.40 mL) were stirred at room temperature for 48 h. Aqueous HCl (3 M, 0.50 mL) was added to the mixture and it was extracted with CH<sub>2</sub>Cl<sub>2</sub>. The organic layer was passed through a pad of silica gel with CH<sub>2</sub>Cl<sub>2</sub> as an eluent, and concentrated on a rotary evaporator. The residue was subjected to preparative TLC on silica gel with hexane/CH<sub>2</sub>Cl<sub>2</sub> (3:1) to give **4** as a white solid (33.3 mg, 0.063 mmol, 63% yield, 89% ee). The ee was measured by HPLC (Chiralpak ID column × 2, hexane/chloroform/ethanol = 180:60:1, flow 0.5 mL/min, 254 nm, t<sub>1</sub> = 49.9 min (minor), t<sub>2</sub> = 51.6 min (major); [α]<sub>D</sub><sup>20</sup> -15 (c 0.50, CHCl<sub>3</sub>))

for 89% ee (1*S*,2*S*,4*R*). <sup>1</sup>H NMR (CDCl<sub>3</sub>) δ 1.07 (d, *J* = 9.5 Hz, 1H), 1.18–1.27 (m, 2H), 1.33–1.40 (m, 2H), 1.46–1.54 (m, 2H), 1.80–1.86 (m, 1H), 2.27 (s, 2H), 2.45 (s, 3H), 3.10 (dd, *J* = 8.9, 5.5 Hz, 1H), 7.32 (d, *J* = 8.1 Hz, 2H), 7.56 (d, *J* = 2.0 Hz, 1H), 7.69 (d, *J* = 8.1 Hz, 2H), 7.75 (d, *J* = 2.0 Hz, 1H); <sup>13</sup>C NMR (CDCl<sub>3</sub>) δ 21.7, 28.7, 29.7, 33.4, 36.0, 36.2, 40.8, 52.9, 119.6, 121.0, 128.8, 130.0, 132.0, 132.1, 138.1, 138.2, 142.8, 146.4, 201.1. HRMS (ESI) calcd for C<sub>21</sub>H<sub>20</sub>Br<sub>2</sub>NaO<sub>4</sub>S (M+Na)<sup>+</sup> 548,9348, found 548.9341.

## 12. X-Ray data of 4

A colorless crystal of **4** suitable for X-ray crystallographic analysis was obtained by recrystallization from CH<sub>2</sub>Cl<sub>2</sub>/methanol. The ORTEP drawing of **4** is shown in Figure S1. The crystal structure has been deposited at the Cambridge Crystallographic Centre (deposition number: CCDC 1402140). The data can be obtained free of charge via [www.ccdc.cam.ac.uk/data\\_request/cif](http://www.ccdc.cam.ac.uk/data_request/cif).

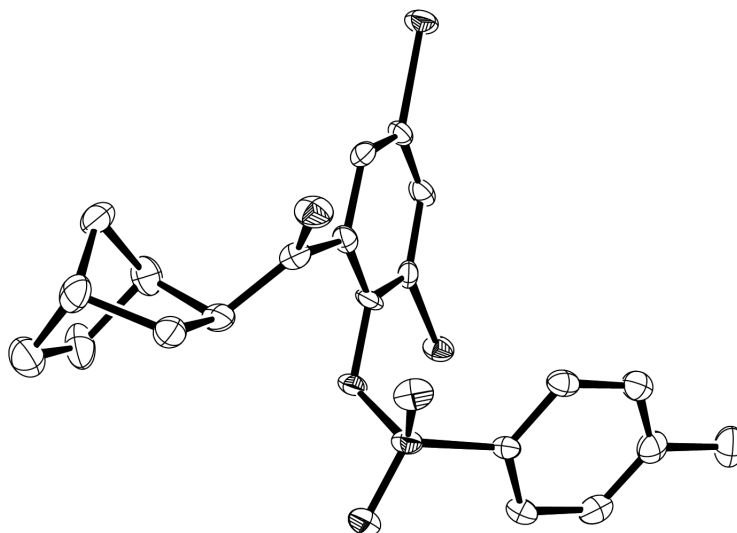

**Figure S1.** ORTEP illustration of (1*S*,2*S*,4*R*)-**4** with thermal ellipsoids drawn at 50% probability level (hydrogen atoms are omitted for clarity). One of four independent molecules is shown.

X-Ray data were collected on a Rigaku XtaLAB P200 using a graphite monochromator with Cu-*K*α radiation ( $\lambda = 1.54187 \text{ \AA}$ ) at 93 K. The structure was solved by direct method (SHELXS-97) and refined with full-matrix least-square technique (SHELXL-97).<sup>15</sup> The absolute structure was deduced based on Flack parameter 0.002(13).<sup>16</sup> The data for **4** are summarized in Table S2.

15 G. M. Sheldrick, Program for the solution and refinement of crystal structures, University of Göttingen, Göttingen, Germany, 1997.

16 H. D. Flack, *Acta Cryst.*, 1983, **A39**, 876.

**Table S2.** Crystal data and structure refinement for **4**.

---

|                                                                |                                                                          |
|----------------------------------------------------------------|--------------------------------------------------------------------------|
| Empirical formula                                              | C <sub>21</sub> H <sub>20</sub> Br <sub>2</sub> O <sub>4</sub> S         |
| Formula weight                                                 | 528.25                                                                   |
| Temperature                                                    | 93(2) K                                                                  |
| Crystal system                                                 | Monoclinic                                                               |
| Space group                                                    | P2 <sub>1</sub>                                                          |
| Unit cell dimensions                                           | a = 10.927(3) Å<br>b = 19.507(4) Å<br>c = 19.810(6) Å<br>β = 105.742(8)° |
| Volume                                                         | 4064.2(19) Å <sup>3</sup>                                                |
| Z                                                              | 4                                                                        |
| Density (calculated) [Mg/m <sup>3</sup> ]                      | 1.727                                                                    |
| μ (mm <sup>-1</sup> )                                          | 6.237                                                                    |
| F(000)                                                         | 2112                                                                     |
| No. of reflections                                             | 26845                                                                    |
| Independent reflections                                        | 12241 [ <i>R</i> (int) = 0.0371]                                         |
| No. of parameters                                              | 1013                                                                     |
| Completeness to θ (%)                                          | 97.7                                                                     |
| Goodness-of-fit                                                | 1.048                                                                    |
| <i>R</i> <sub>1</sub> [ <i>I</i> > 2σ( <i>I</i> )]             | 0.0346                                                                   |
| <i>wR</i> <sub>2</sub> (all data)                              | 0.0888                                                                   |
| Flack parameter                                                | 0.002(13)                                                                |
| Largest diff. peak and hole [e <sup>-</sup> /Å <sup>-3</sup> ] | 0.906 and -0.773                                                         |

---

### 13. <sup>1</sup>H and <sup>13</sup>C NMR spectra

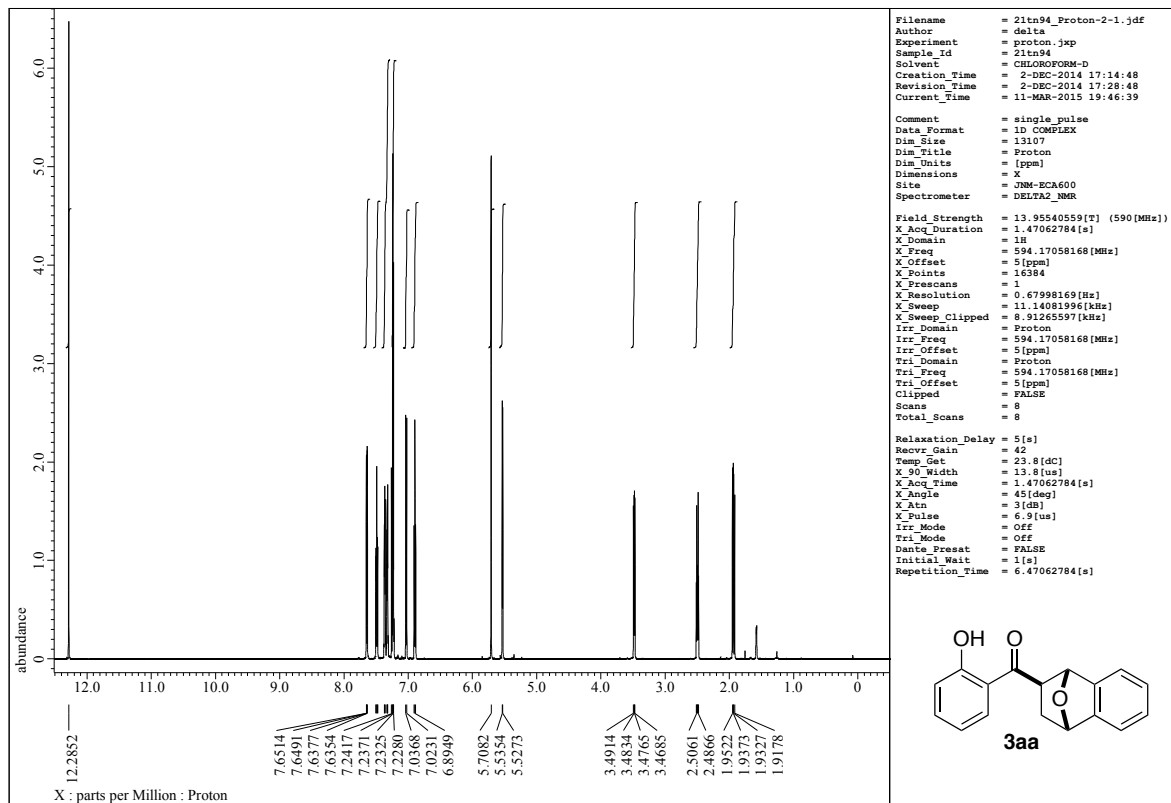

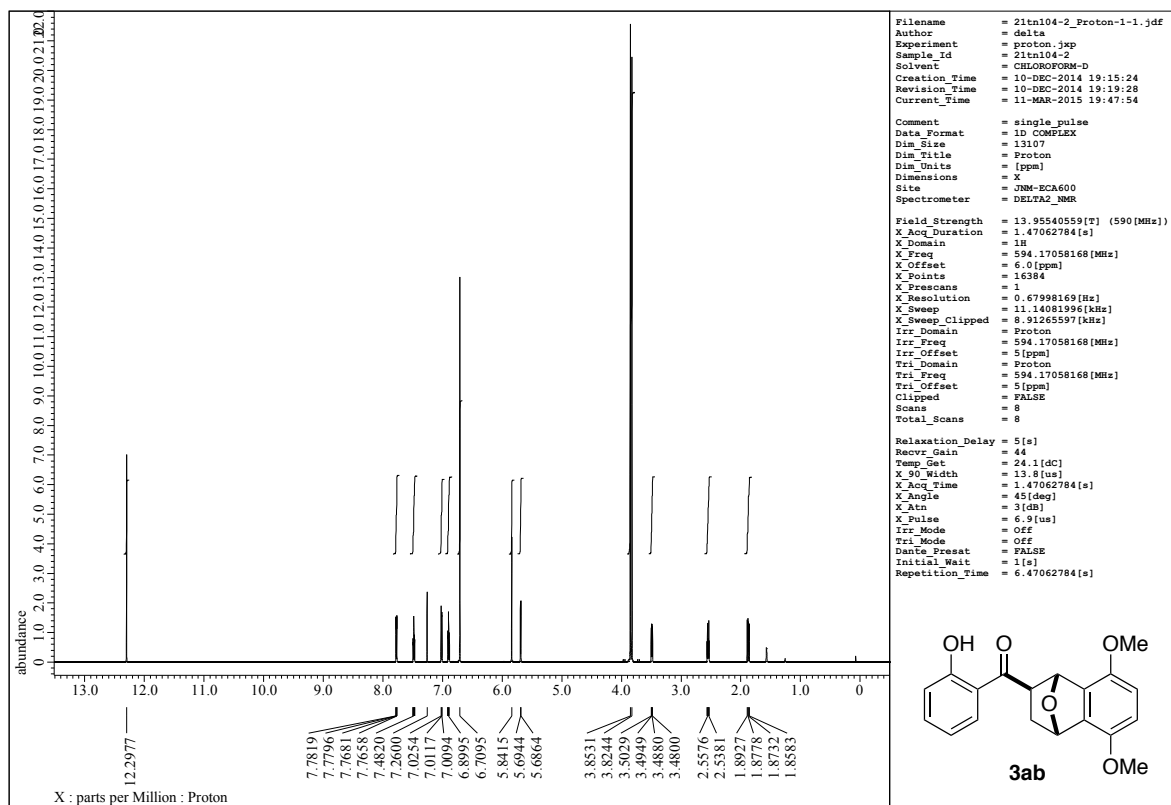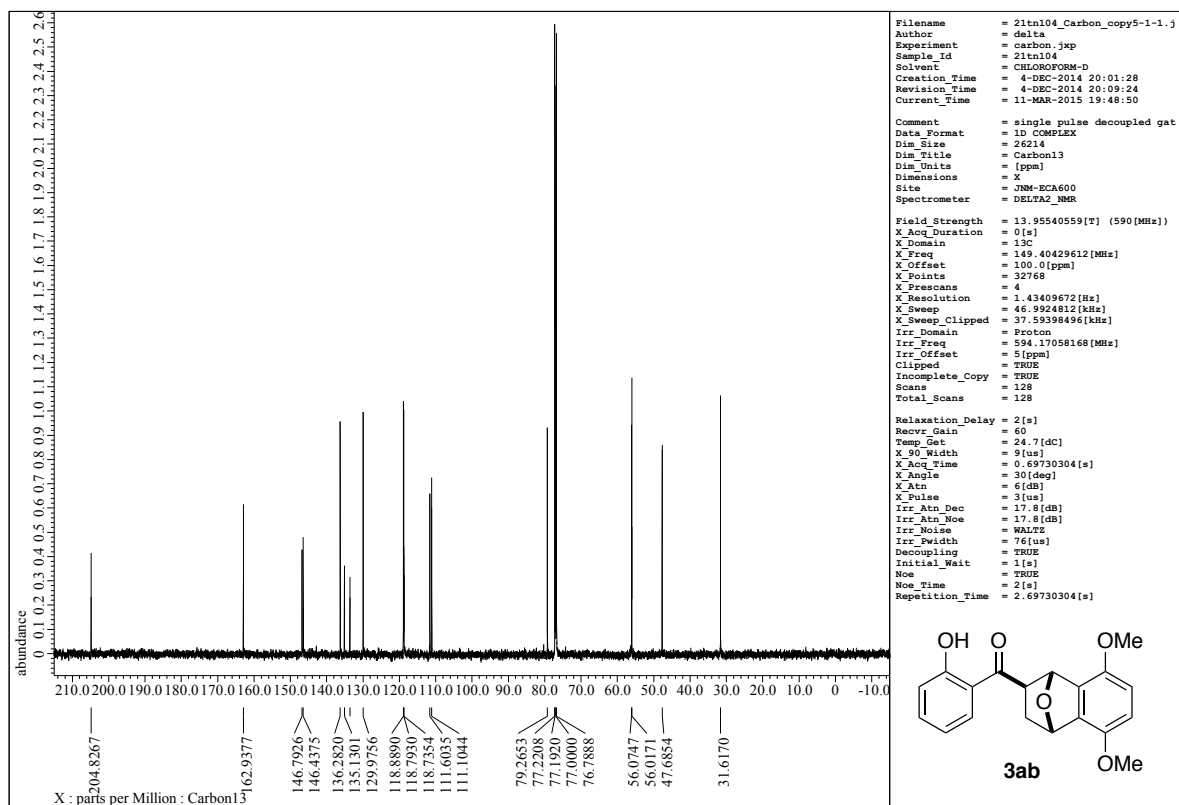

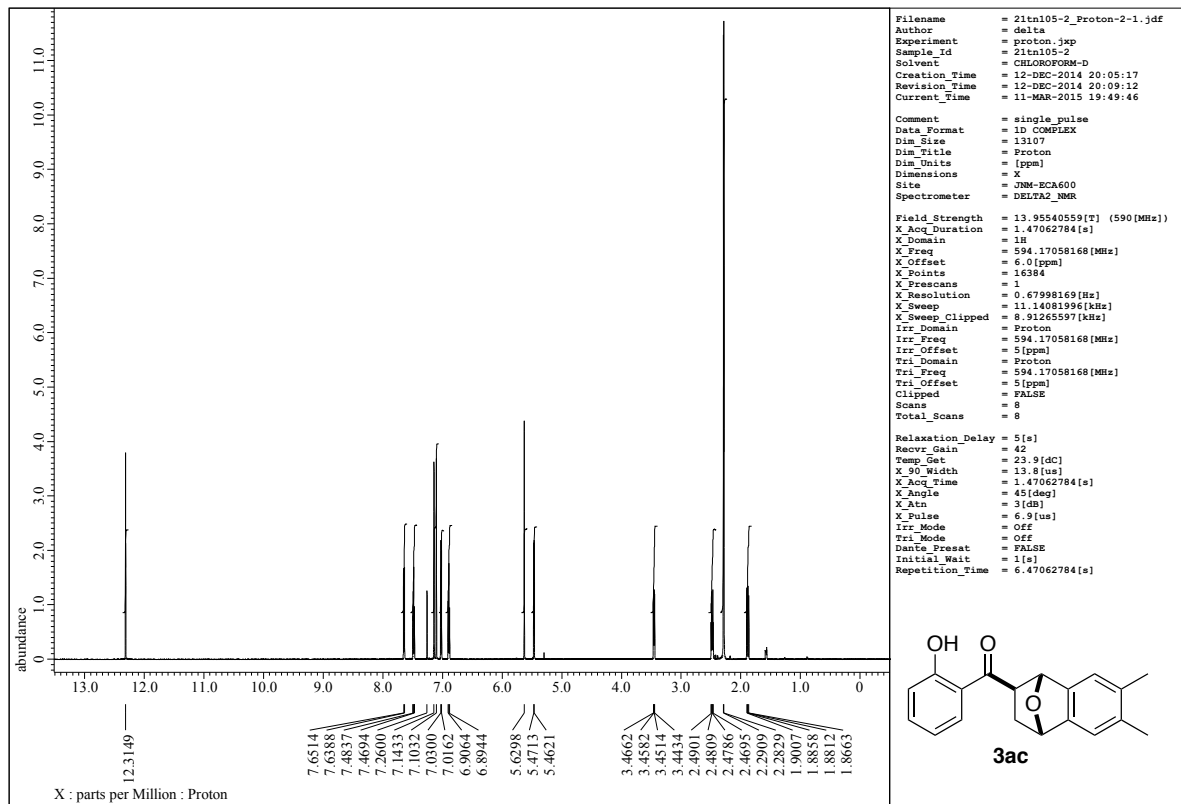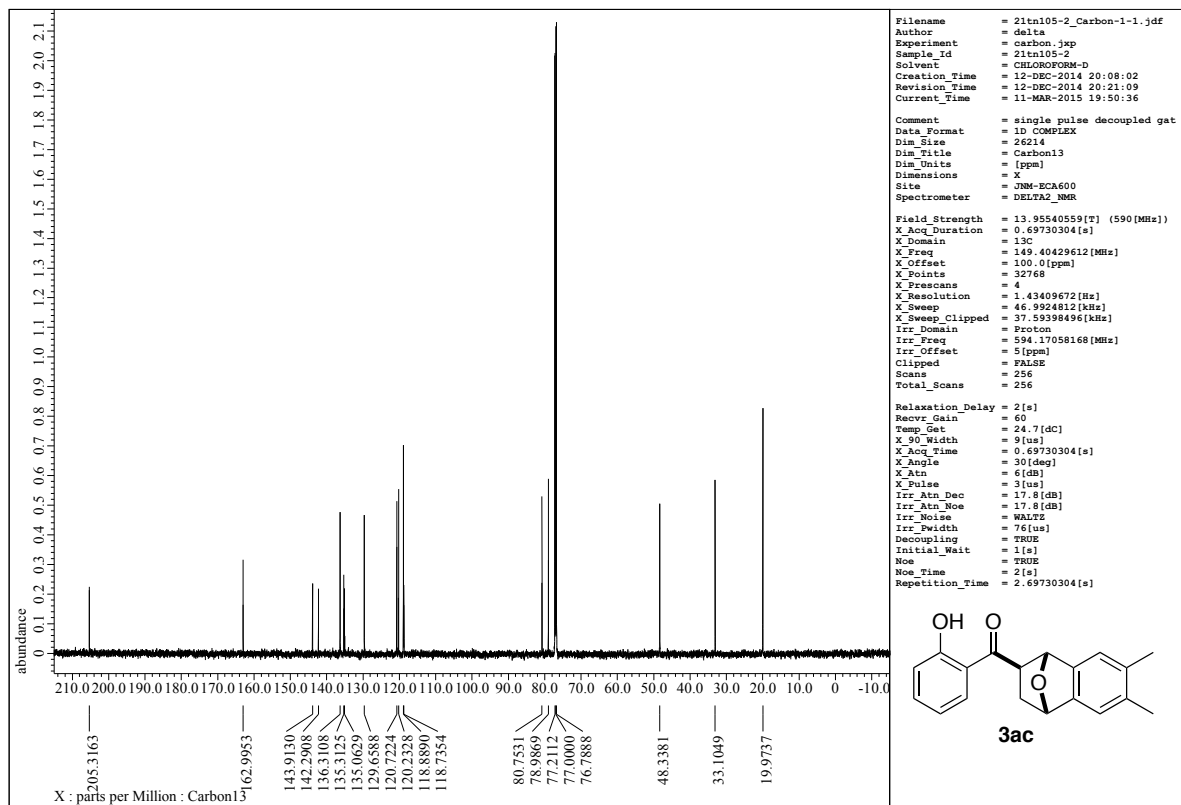



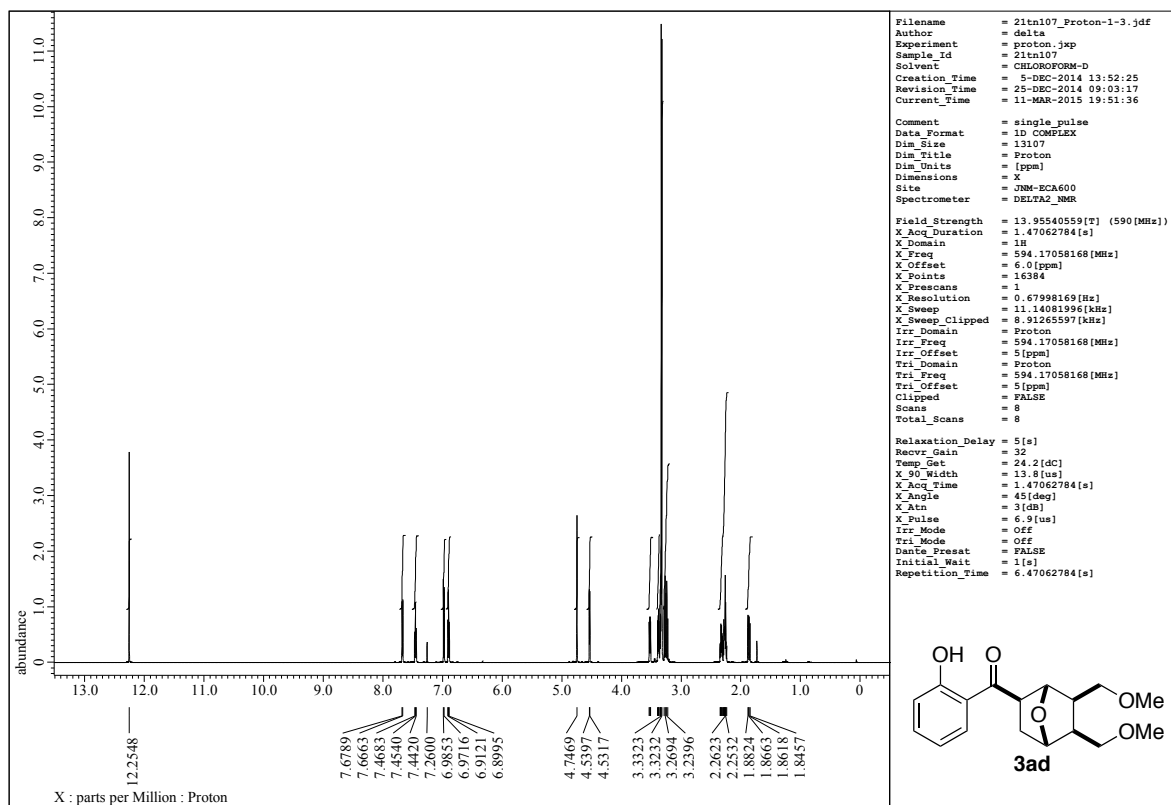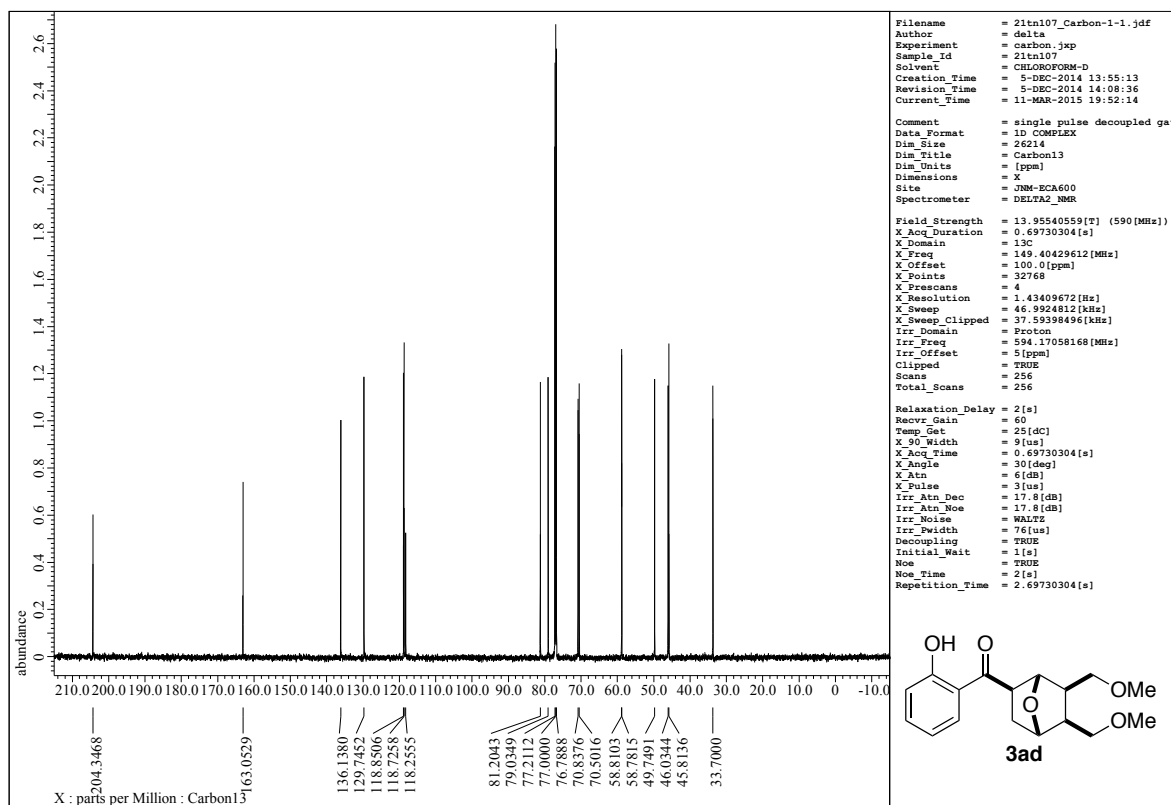

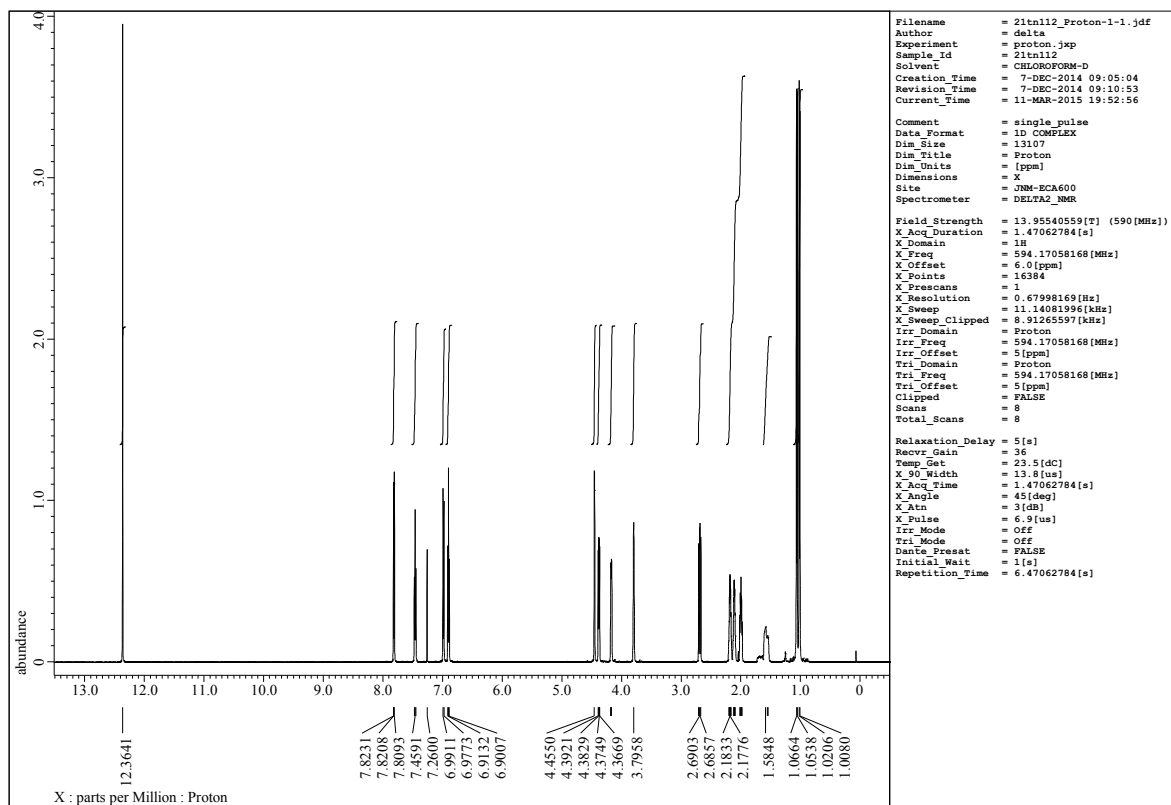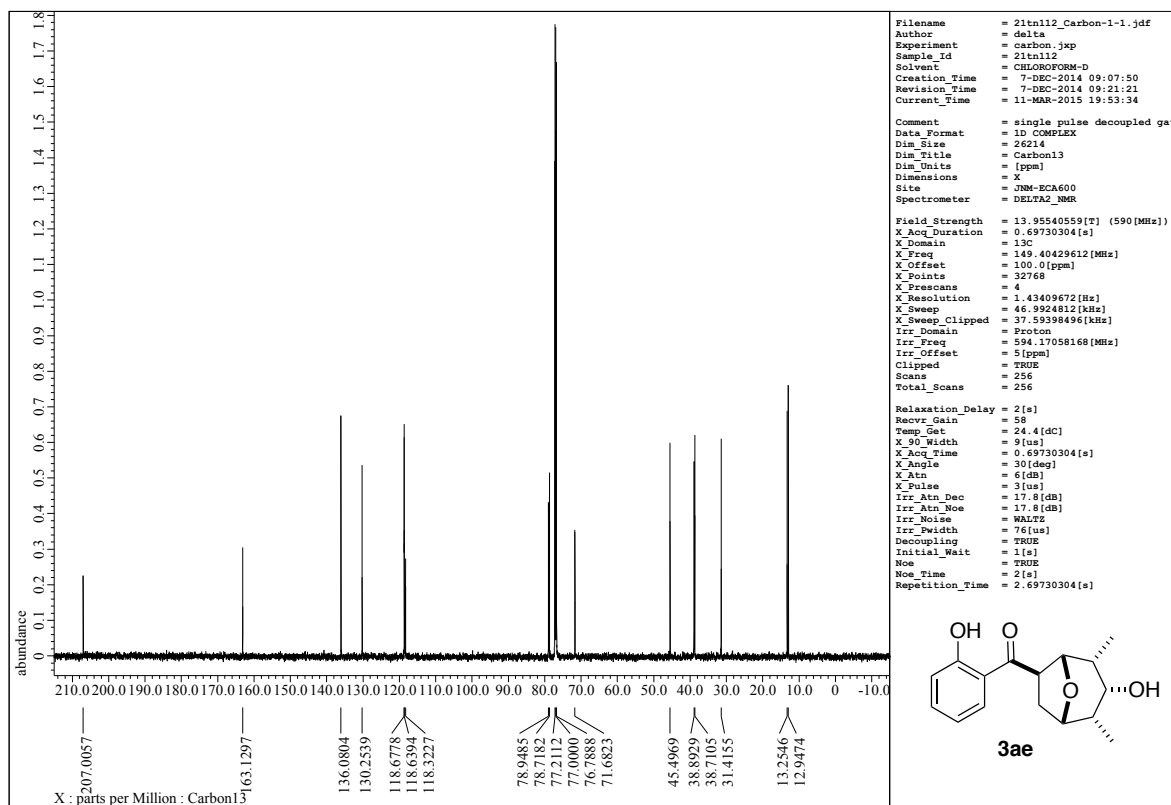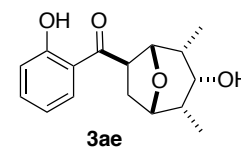

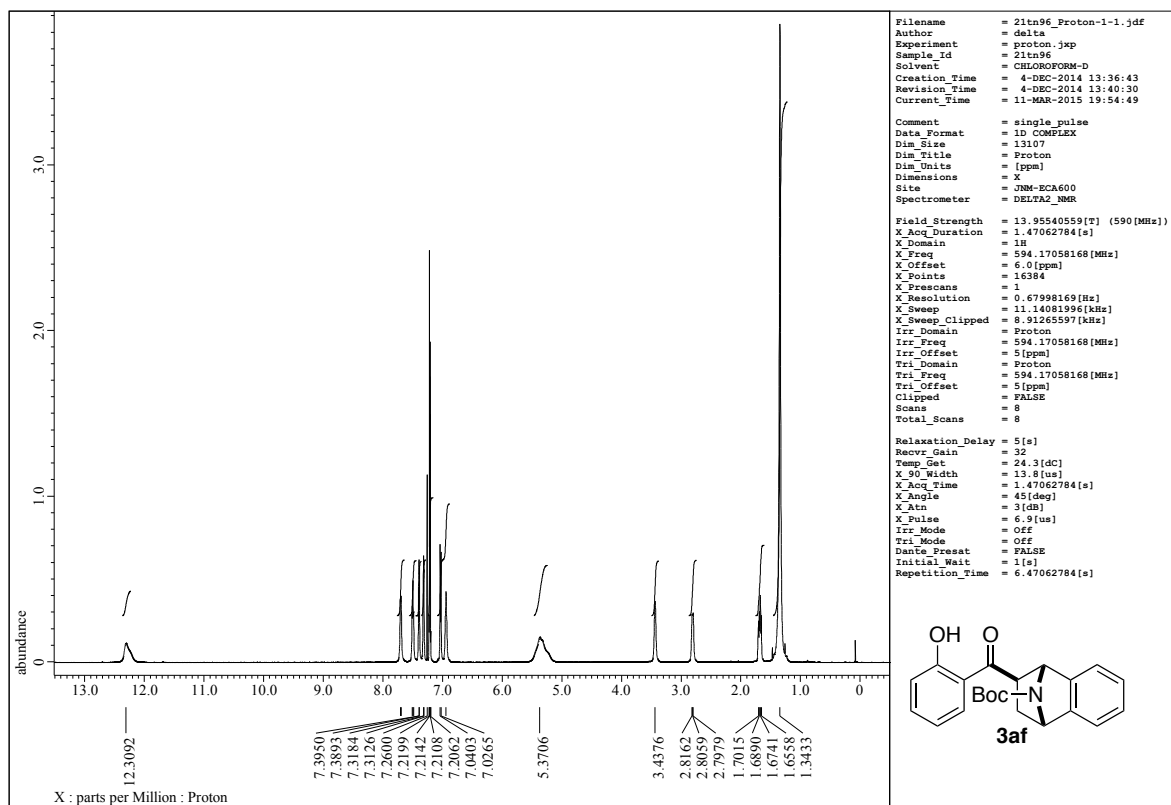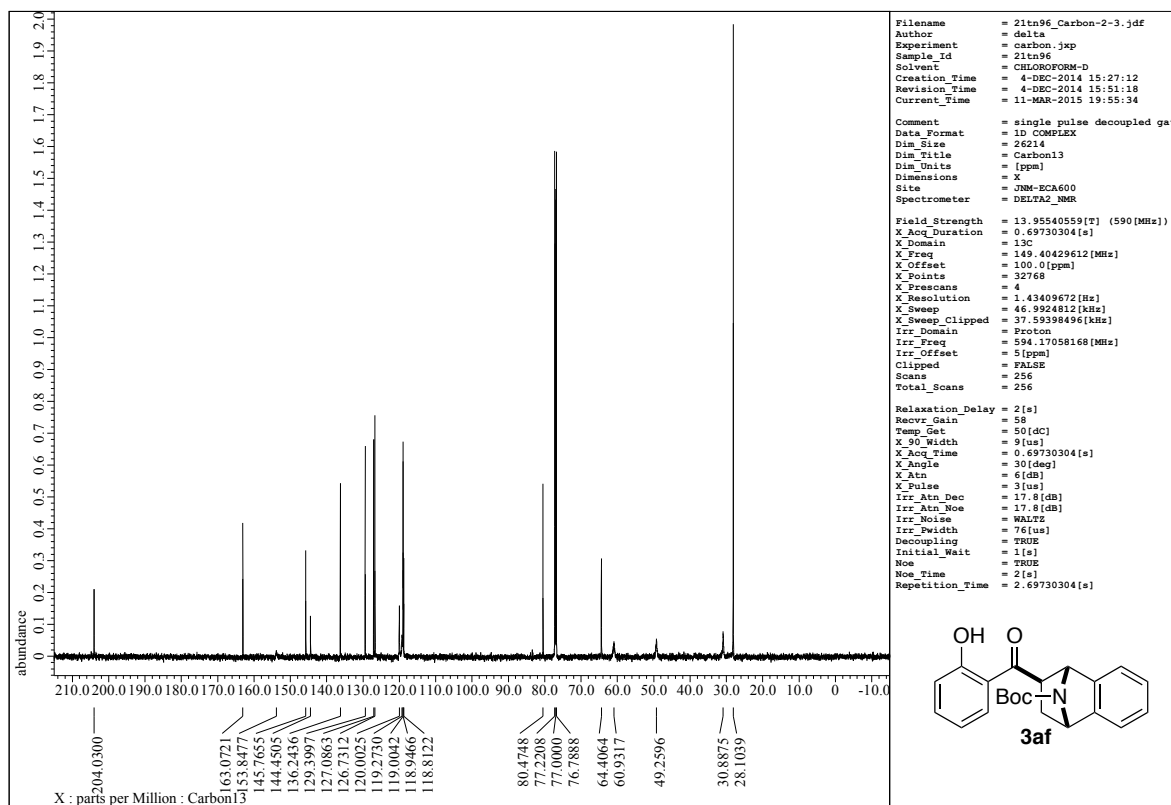

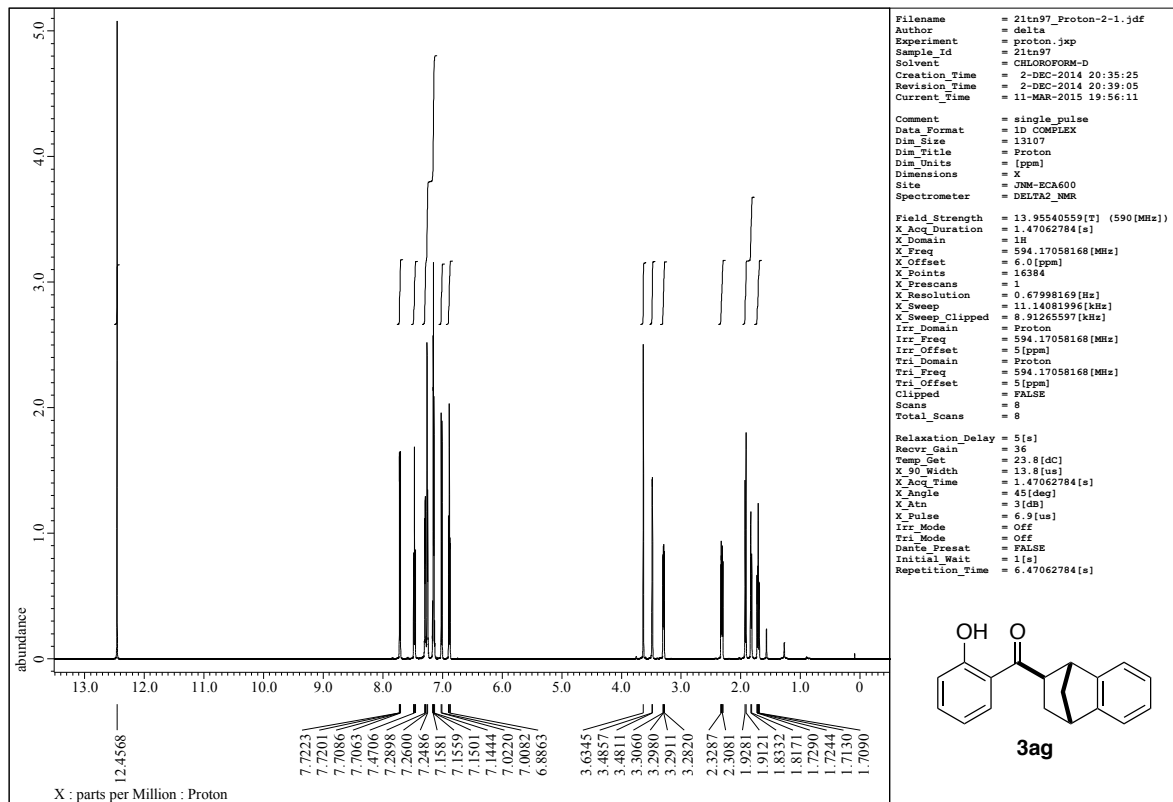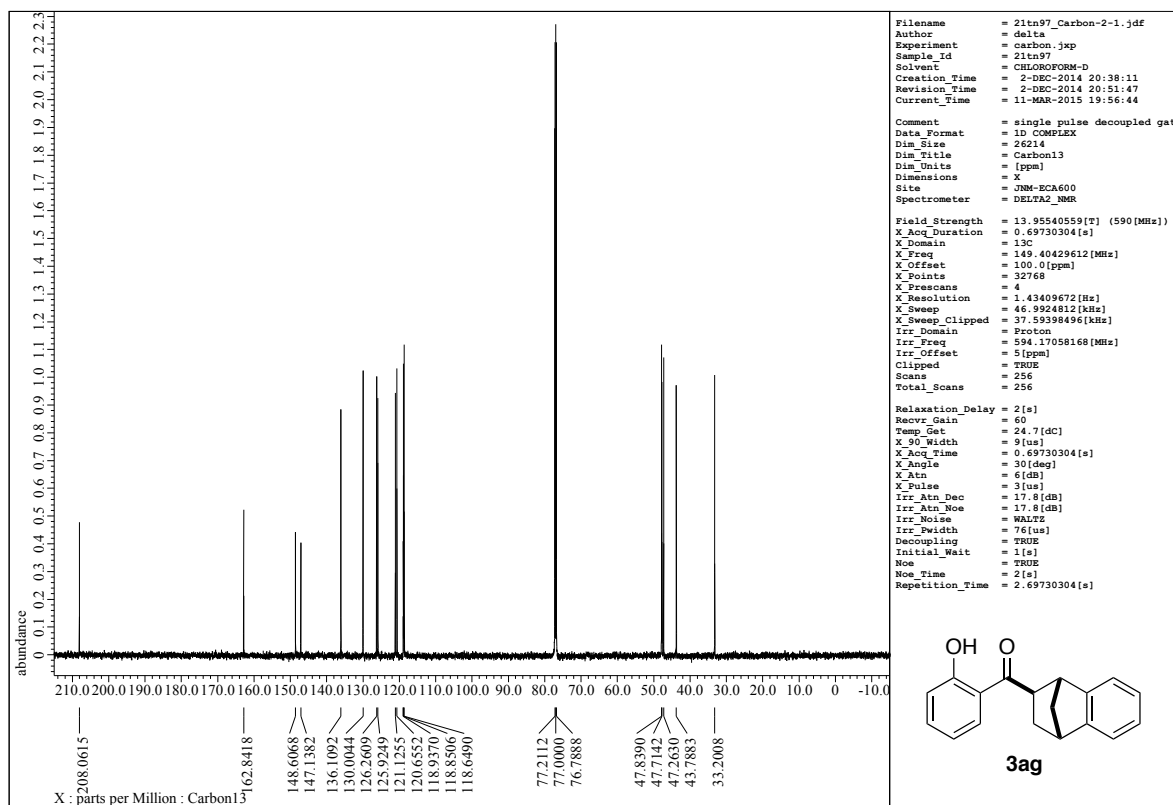

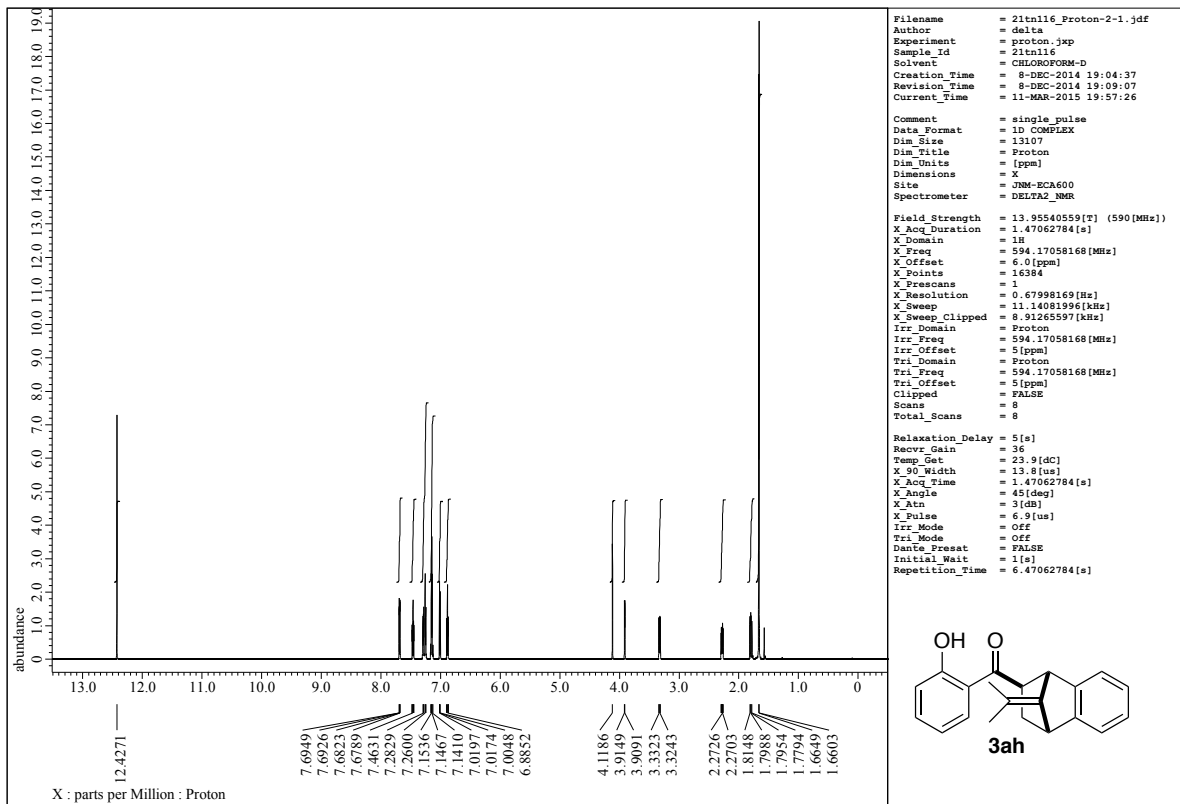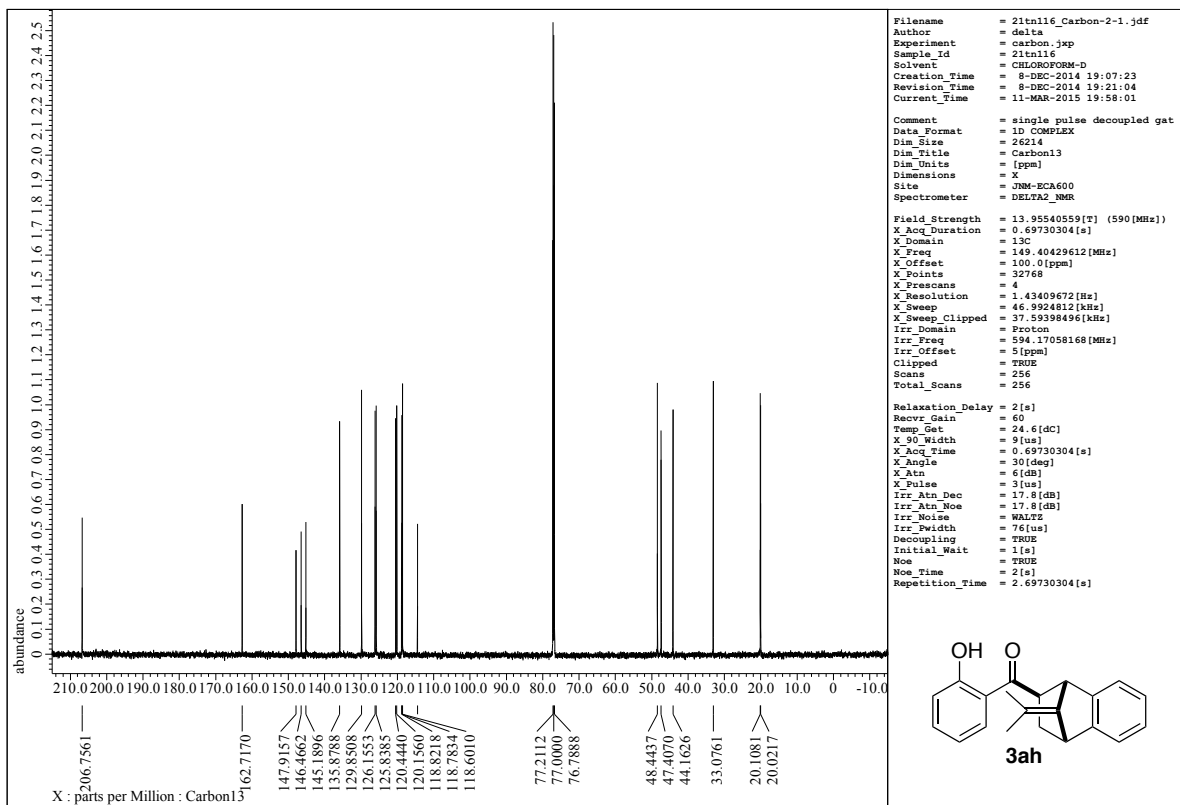

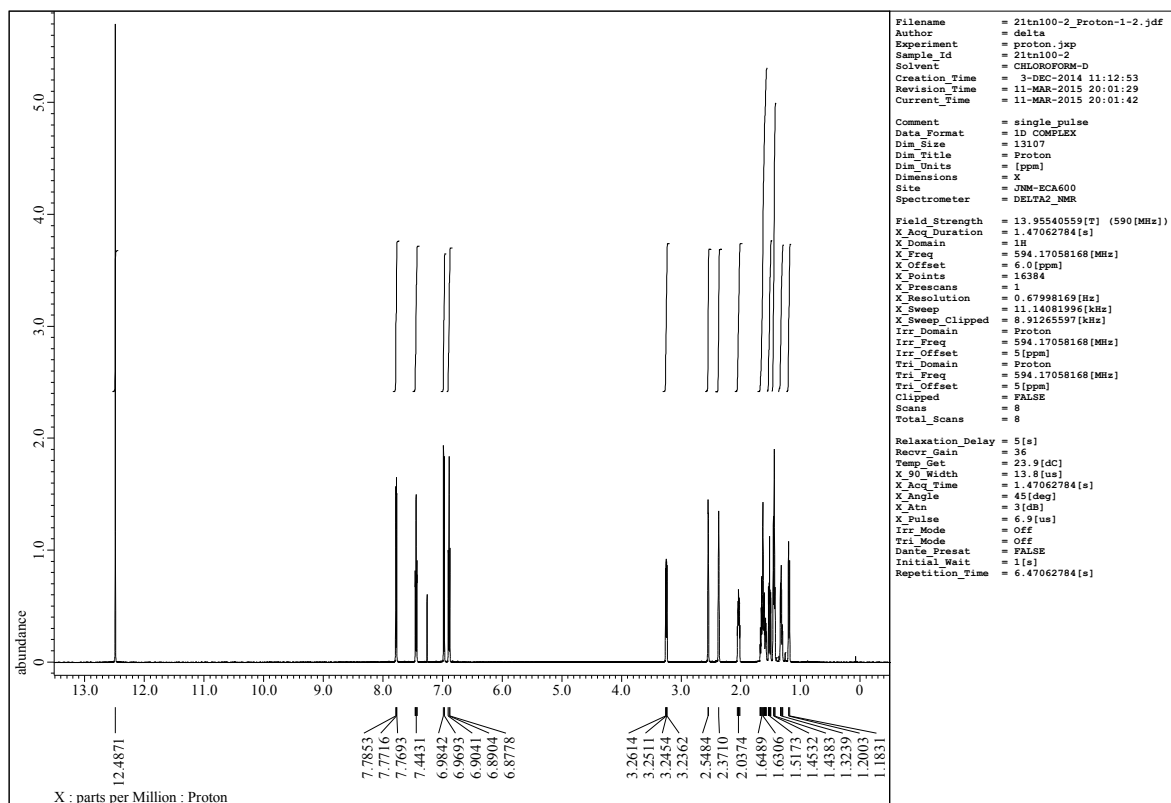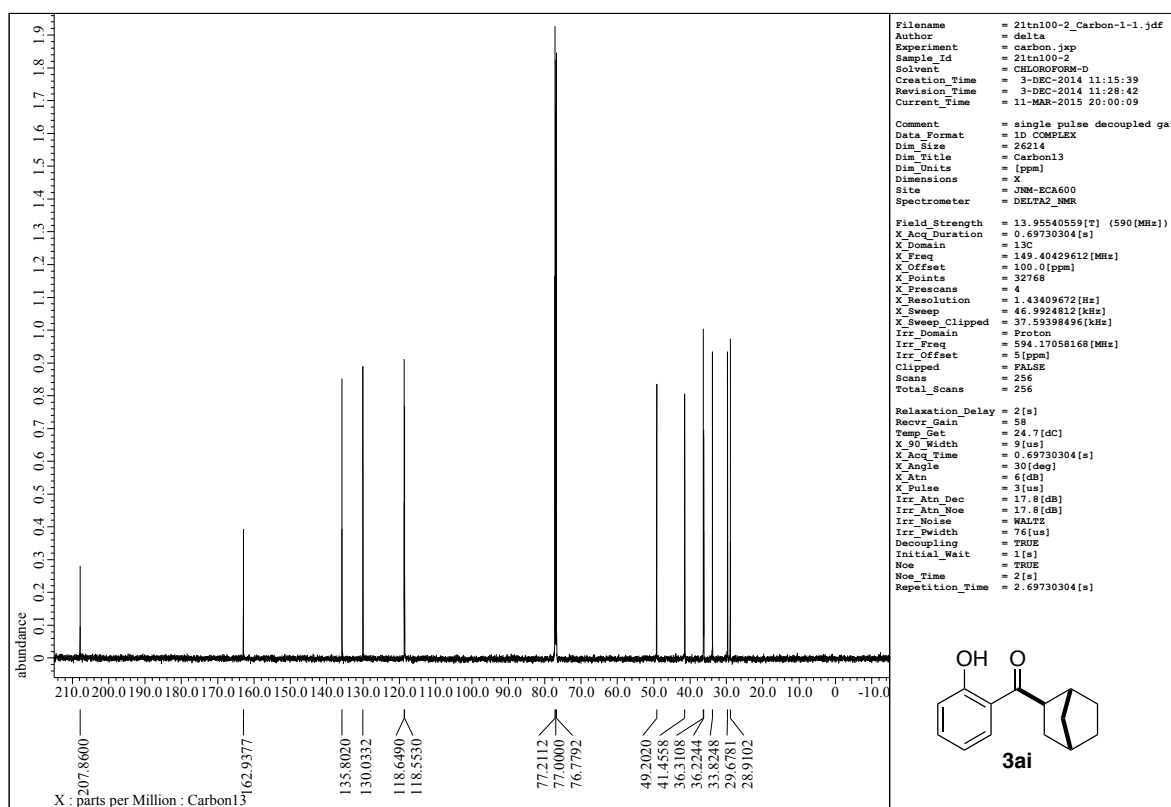

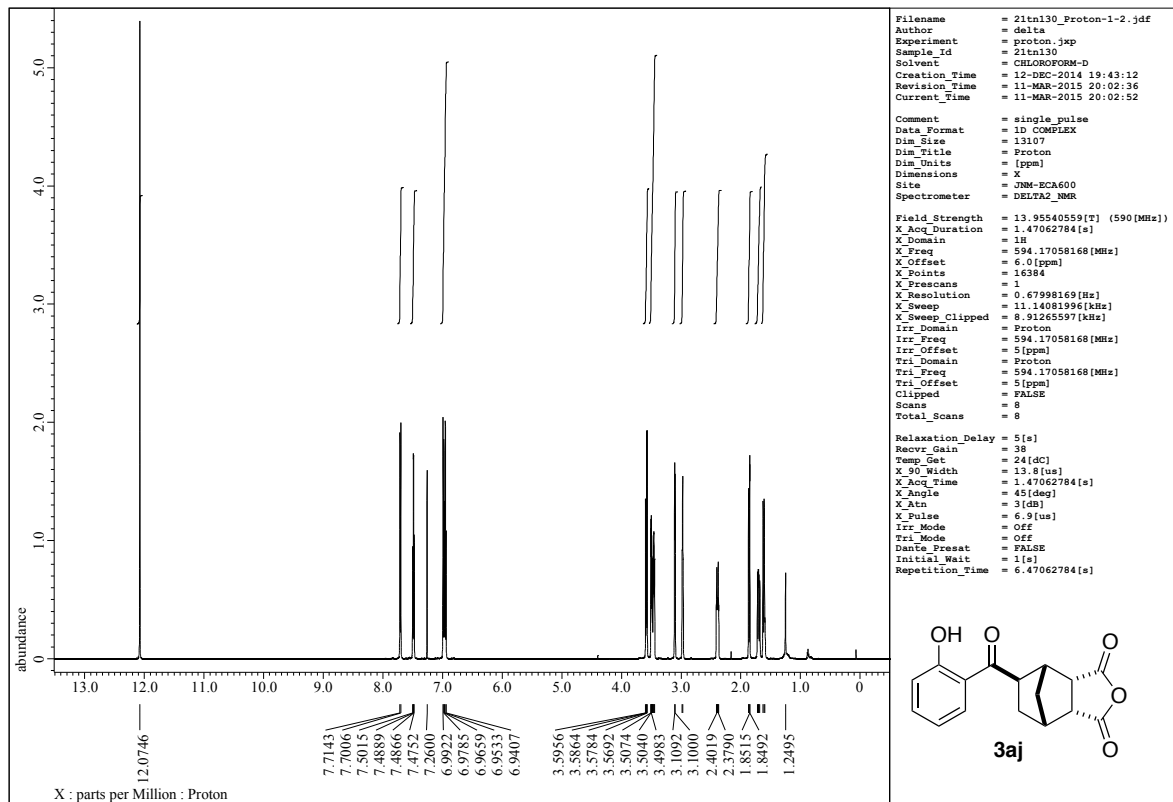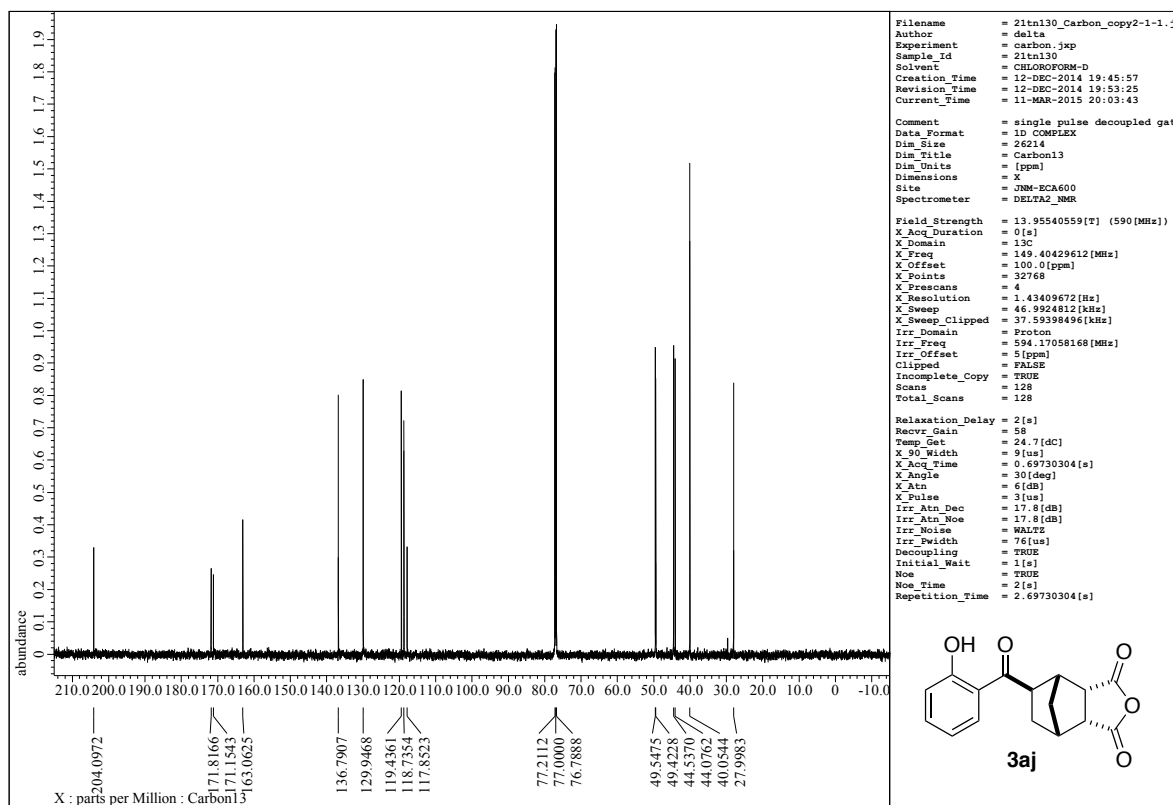

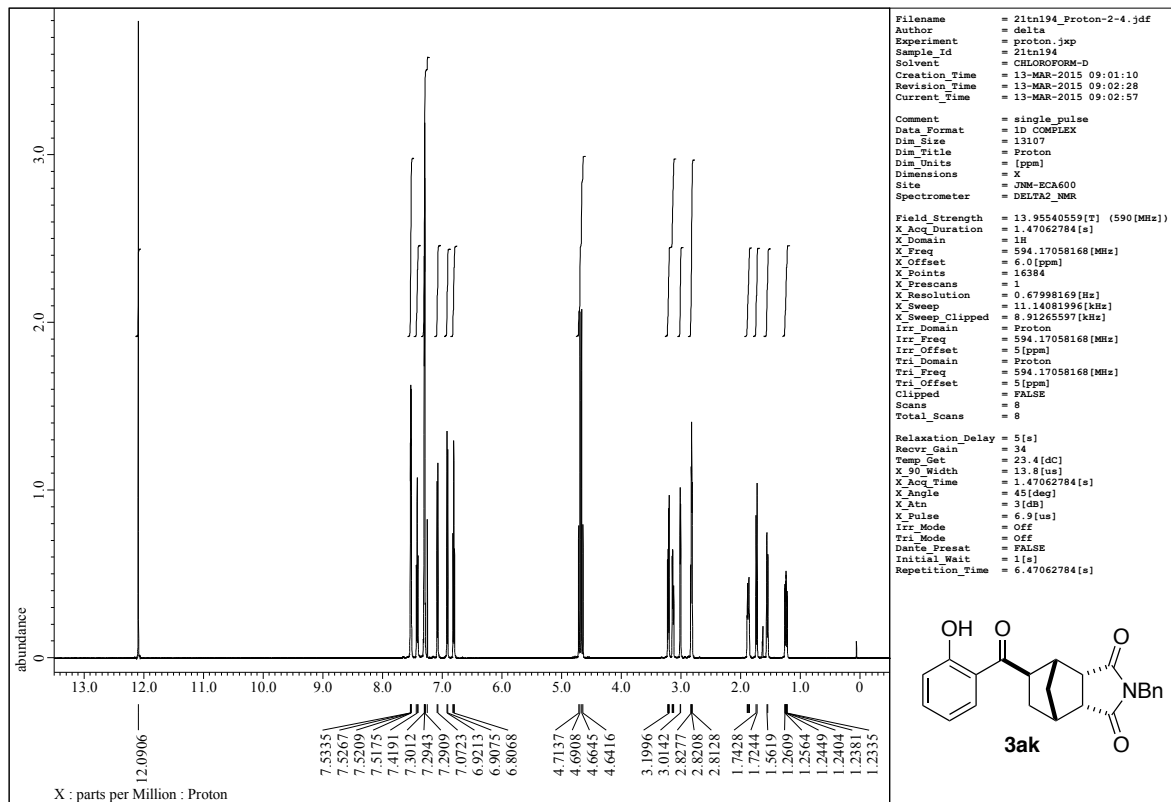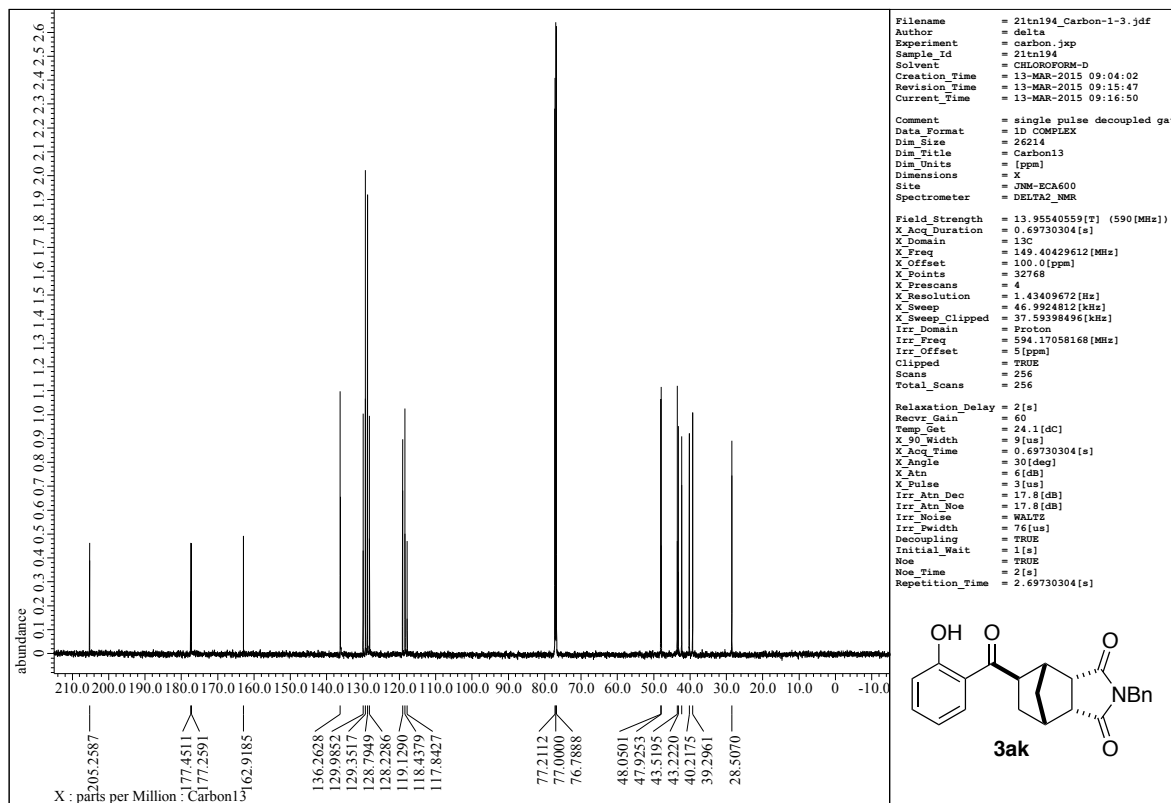



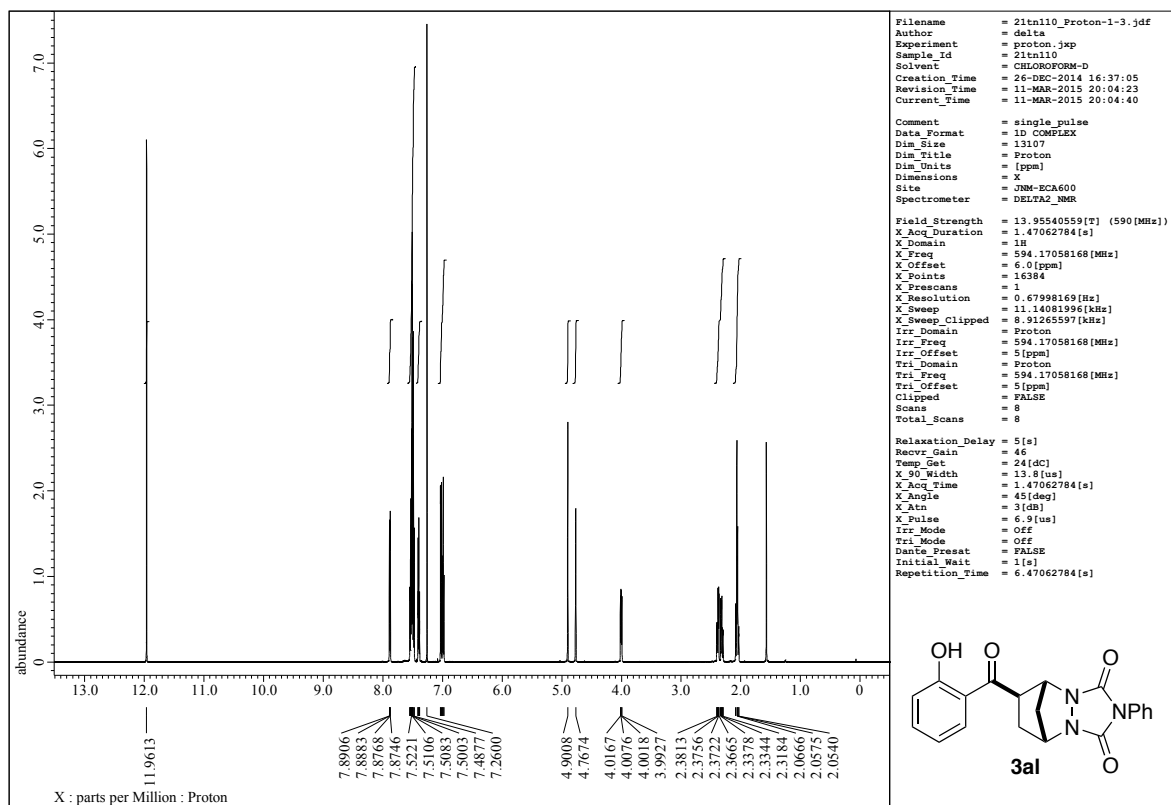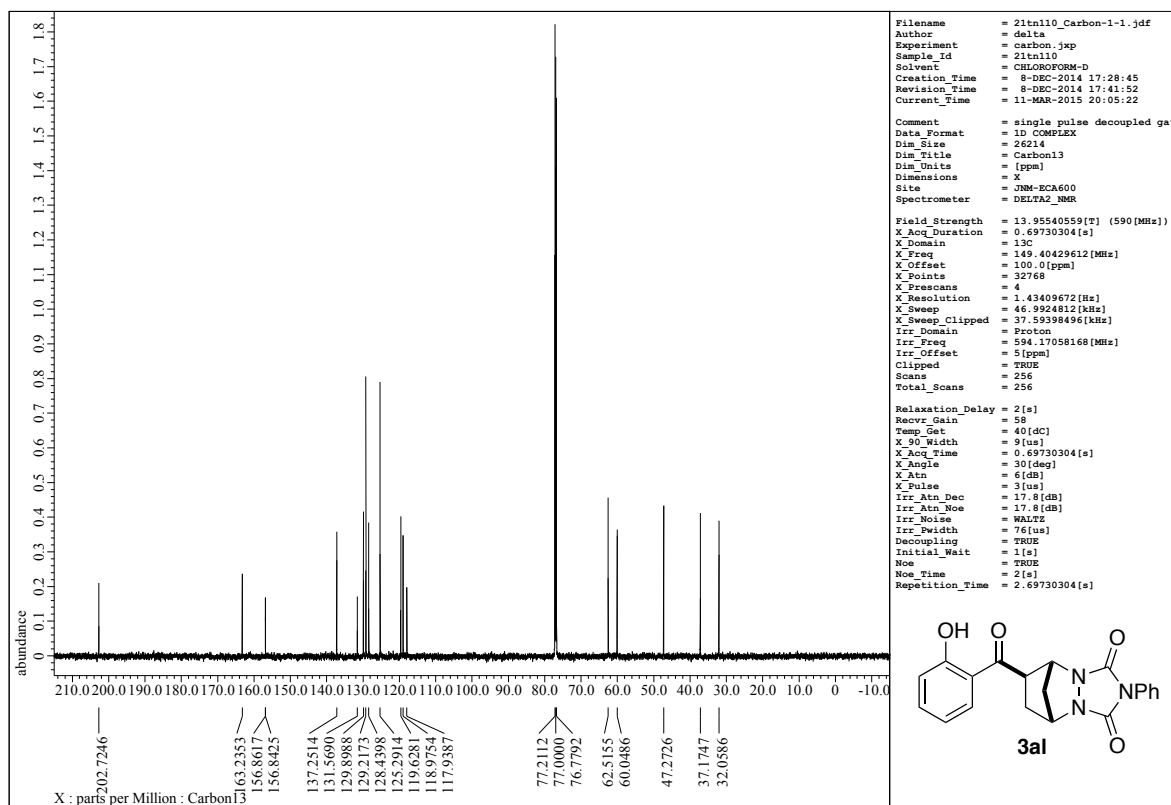

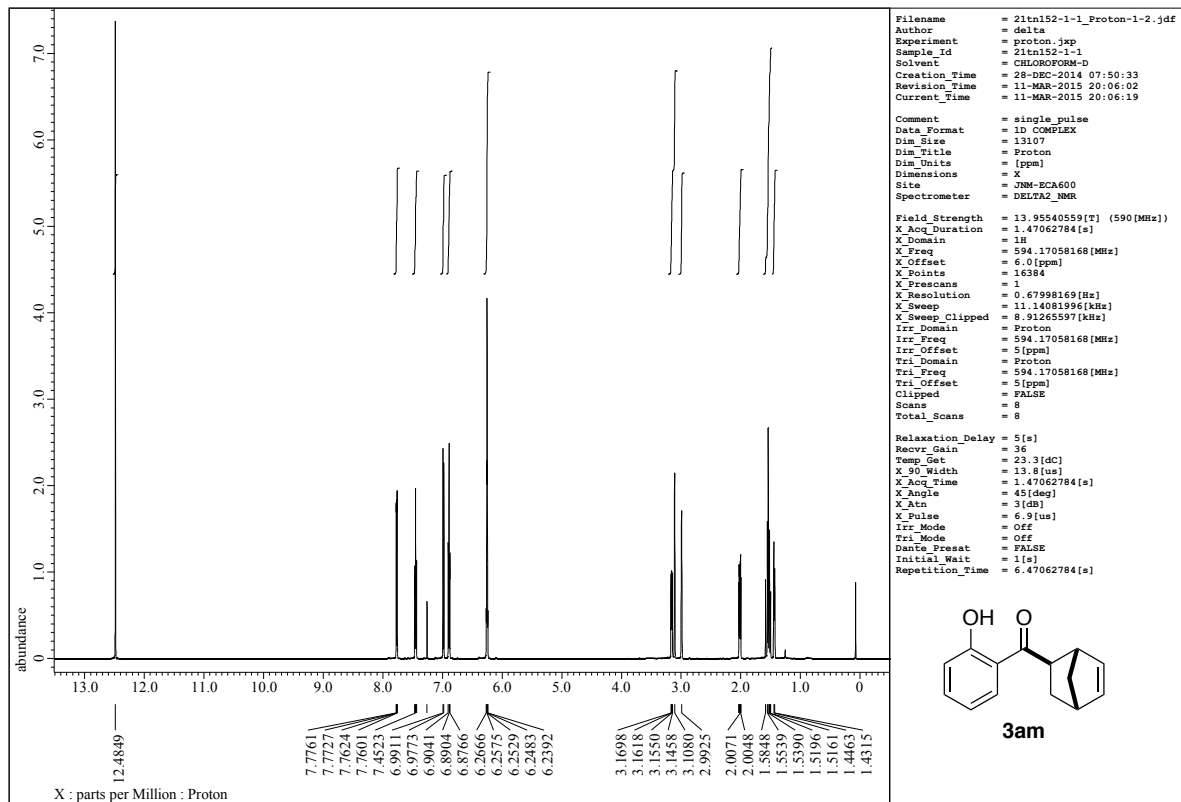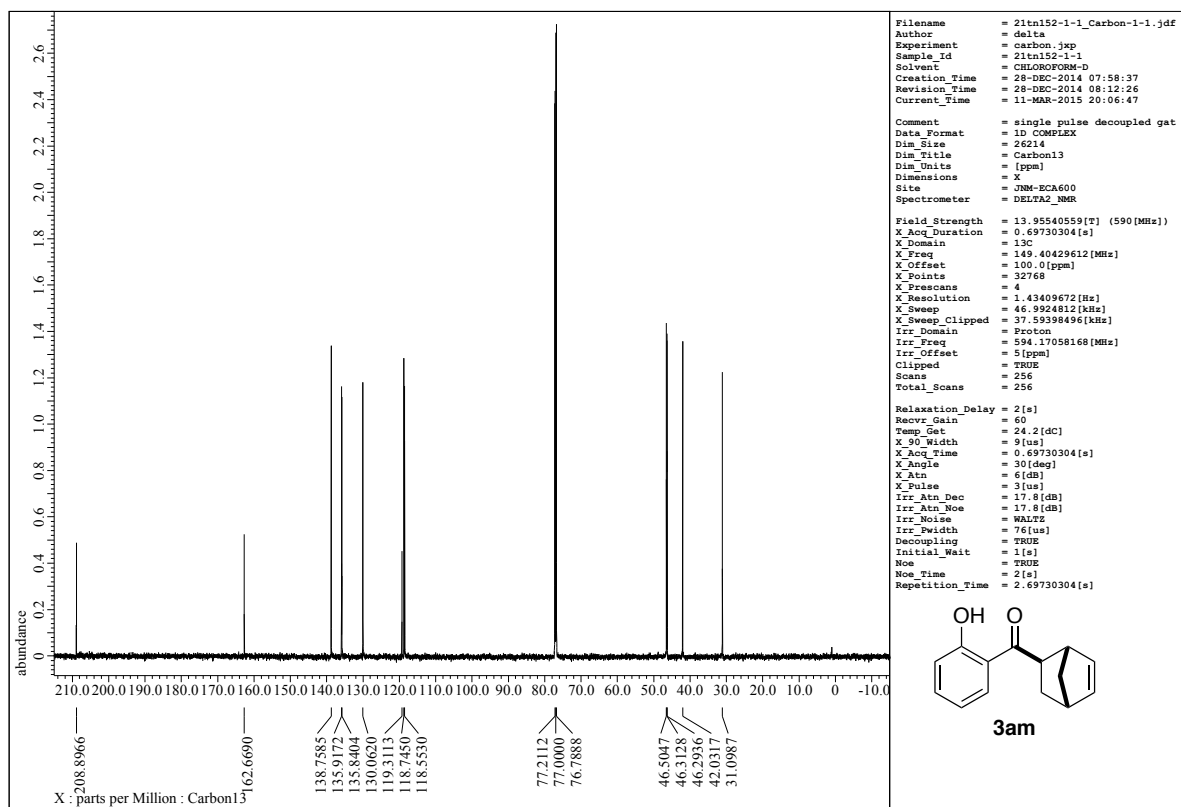

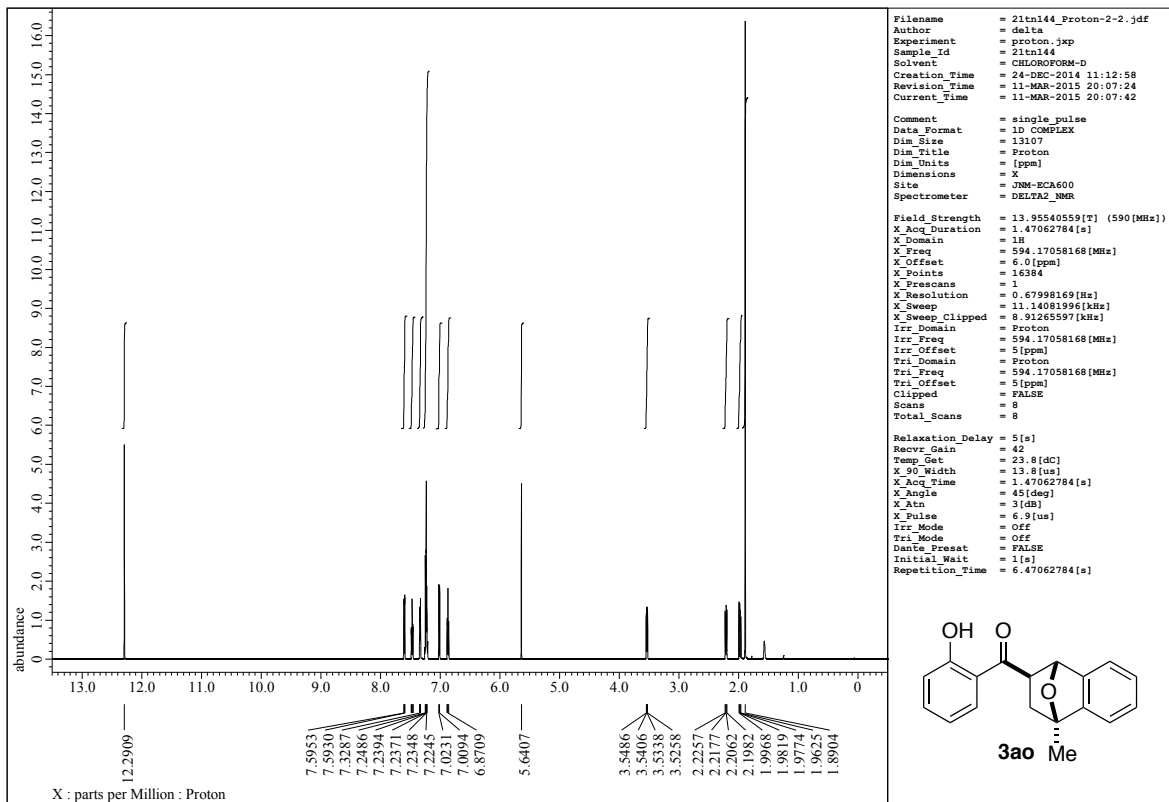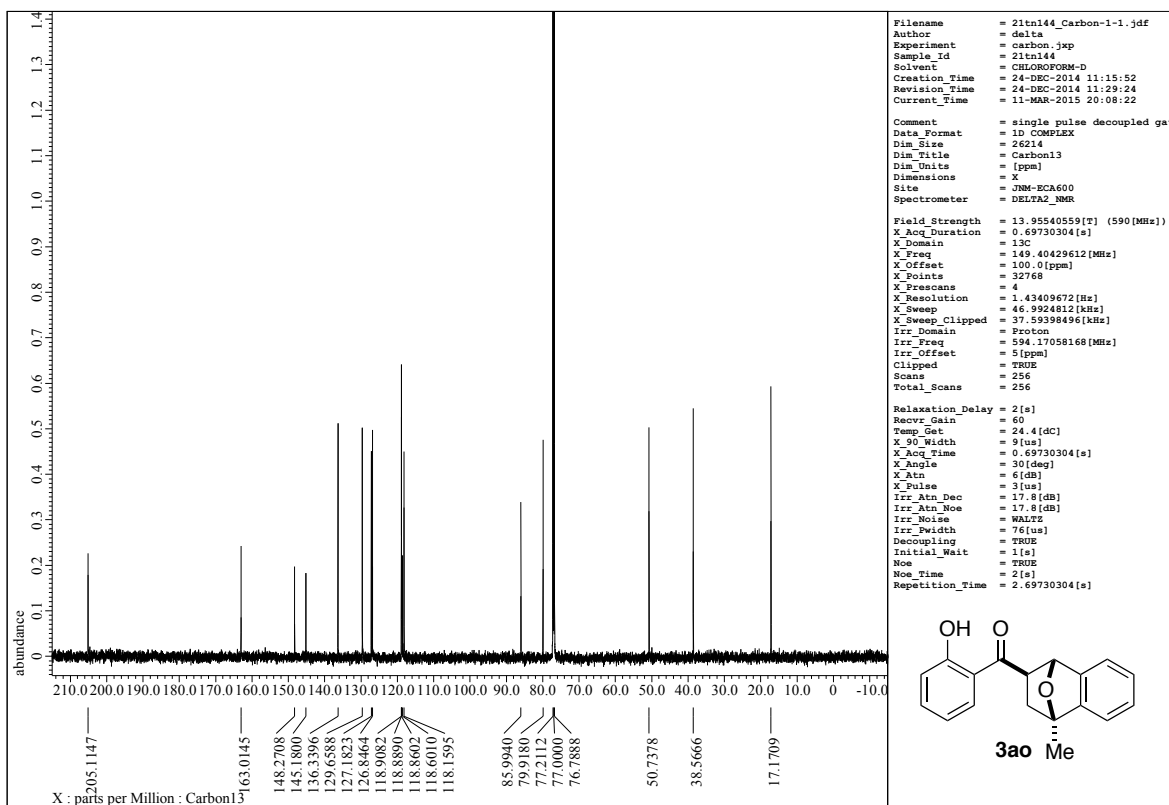

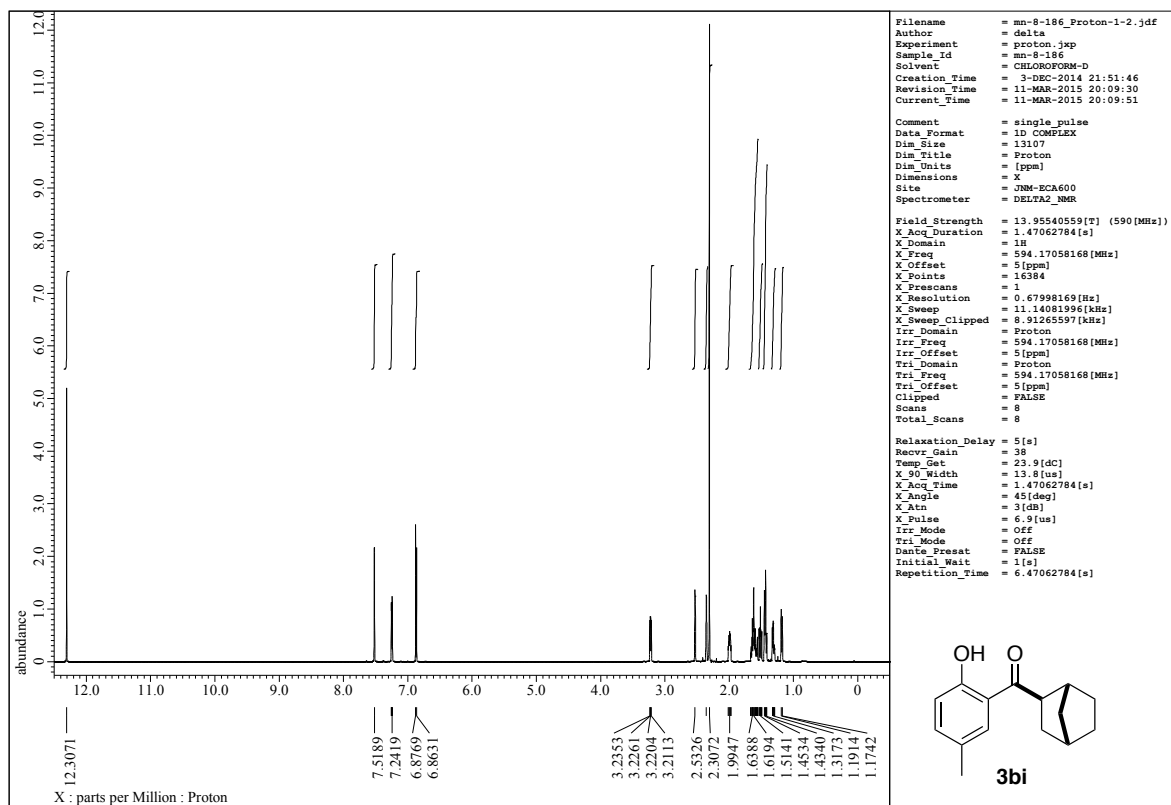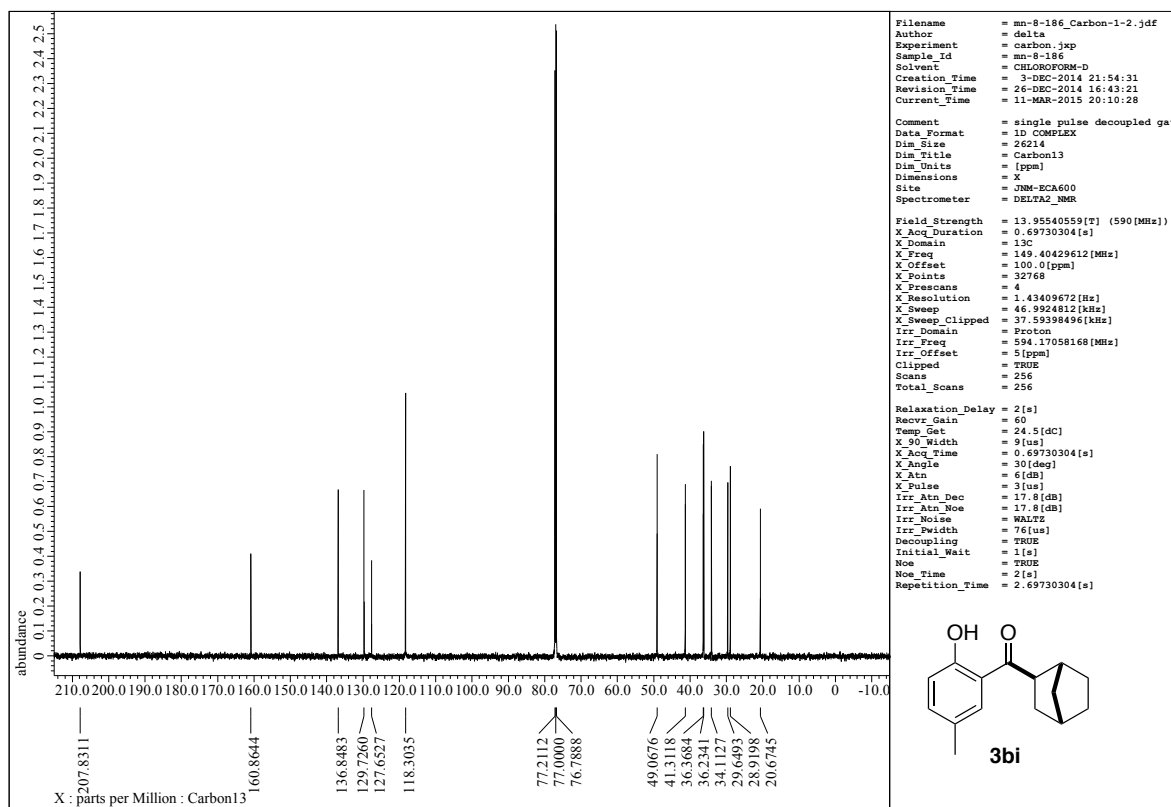

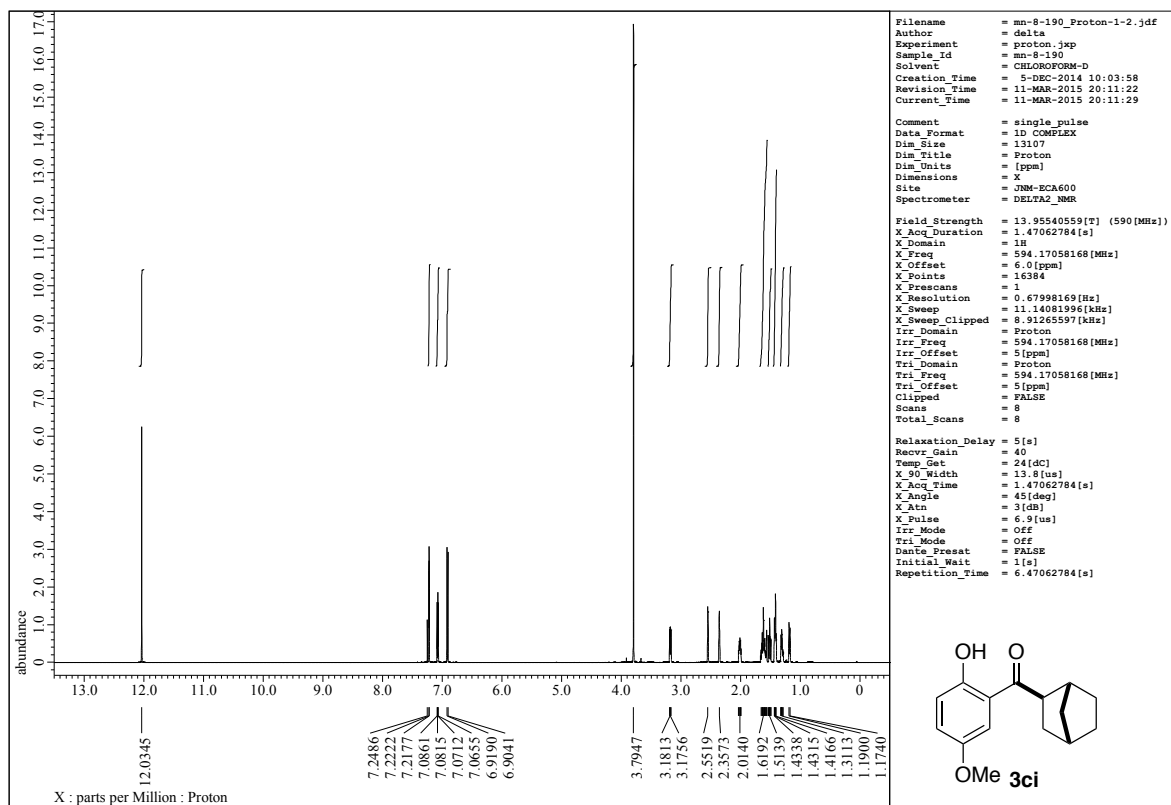

```

Filename      = mm-8-190_Proton-1-2.jdf
Author       = delta
Experiment   = proton.jxp
Sample_Id    = mm-8-190
Solvent      = CHLOROFORM-D
Creation_Time = 5-DEC-2014 10:03:58
Revision_Time = 11-MAR-2015 20:11:22
Current_Time = 11-MAR-2015 20:11:29

Comment      = single pulse
Data_Format  = 1D COMPLEX
Dim_Size     = 13107
Dim_Title    = Proton
Dim_Units    = [ppm]
Dimensions   = X
Site         = JNM-ECA600
Spectrometer = DELTA2_NMR

Field_Strength = 13.95540559[T] (590[MHz])
X_Acq_Duration = 1.47062784[s]
X_Domain      = 18
X_Freq        = 594.17058168[MHz]
X_Offset      = 6.0[ppm]
X_Points      = 16384
X_Prescans    = 1
X_Resolution  = 0.67998169[Hz]
X_Sweep       = 11.14081996[kHz]
X_Sweep_Clipped = 8.91265597[kHz]
Irr_Domain    = Proton
Irr_Freq      = 594.17058168[MHz]
Irr_Offset    = 5[ppm]
Tri_Domain    = Proton
Tri_Freq      = 594.17058168[MHz]
Tri_Offset    = 5[ppm]
Clipped       = FALSE
Scans         = 8
Total_Scans   = 8

Relaxation_Delay = 5[s]
Recvr_Gain       = 45
Temp_Get        = 24[dc]
X_90_Width      = 13.8[us]
X_Acq_Time      = 1.47062784[s]
X_Angle         = 45[deg]
X_Atn           = 3[db]
X_Pulse         = 6.9[us]
Irr_Mode        = Off
Tri_Mode        = Off
Dante_Preset    = FALSE
Initial_Wait    = 1[s]
Repetition_Time = 6.47062784[s]

```

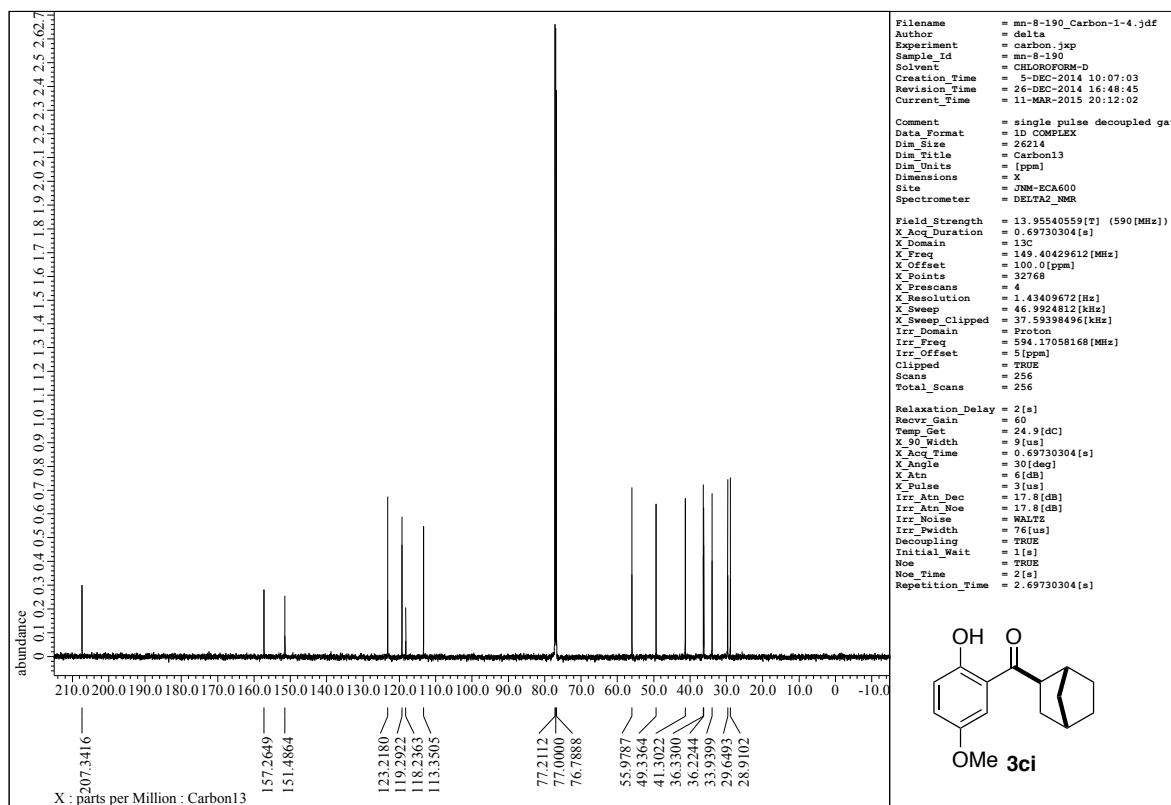

```

Filename      = mm-8-190_Carbon-1-4.jdf
Author       = delta
Experiment   = carbon.jxp
Sample_Id    = mm-8-190
Solvent      = CHLOROFORM-D
Creation_Time = 5-DEC-2014 10:07:03
Revision_Time = 26-DEC-2014 16:48:45
Current_Time = 11-MAR-2015 20:12:02

Comment      = single pulse decoupled gat
Data_Format  = 1D COMPLEX
Dim_Size     = 26214
Dim_Title    = Carbon13
Dim_Units    = [ppm]
Dimensions   = X
Site         = JNM-ECA600
Spectrometer = DELTA2_NMR

Field_Strength = 13.95540559[T] (590[MHz])
X_Acq_Duration = 0.69730304[s]
X_Domain      = 13C
X_Freq        = 149.40429612[MHz]
X_Offset      = 100.0[ppm]
X_Points      = 32768
X_Prescans    = 4
X_Resolution  = 1.43409672[Hz]
X_Sweep       = 46.9924812[kHz]
X_Sweep_Clipped = 37.59398496[kHz]
Irr_Domain    = Proton
Irr_Freq      = 594.17058168[MHz]
Irr_Offset    = 5[ppm]
Clipped       = TRUE
Scans         = 256
Total_Scans   = 256

Relaxation_Delay = 2[s]
Recvr_Gain       = 60
Temp_Get        = 24.9[dc]
X_90_Width      = 9[us]
X_Acq_Time      = 0.69730304[s]
X_Angle         = 30[deg]
X_Atn           = 6[db]
X_Pulse         = 3[us]
Irr_Atn_Dec     = 17.8[db]
Irr_Atn_Noise  = 17.8[db]
Irr_Noise       = NONE
Irr_Width       = 76[us]
Decoupling      = TRUE
Initial_Wait    = 1[s]
Noe              = TRUE
Noe_Time        = 2[s]
Repetition_Time = 2.69730304[s]

```

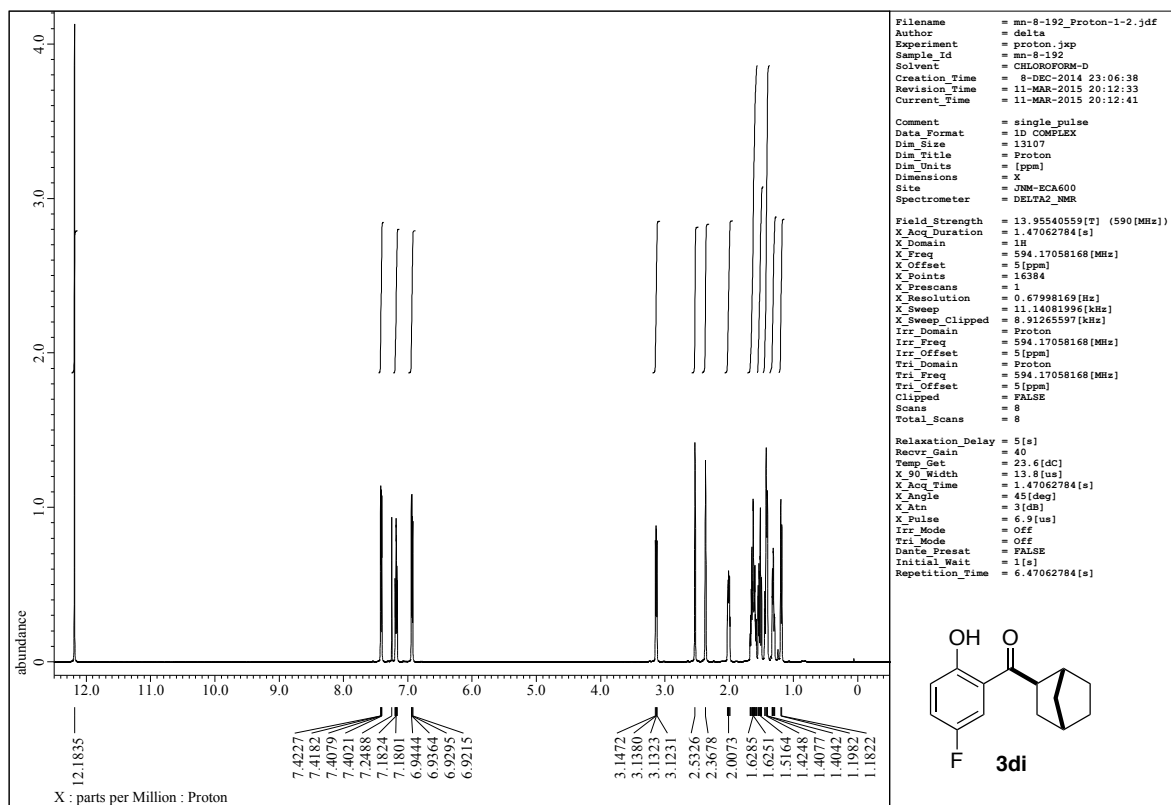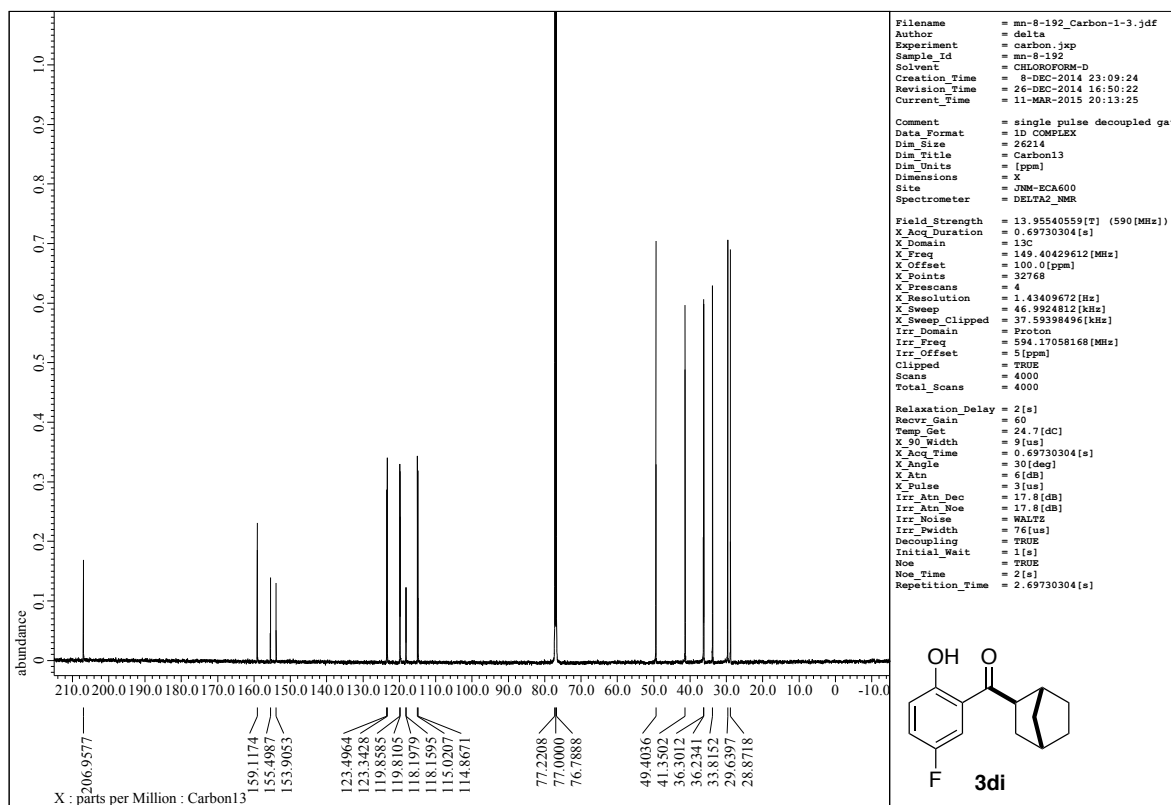

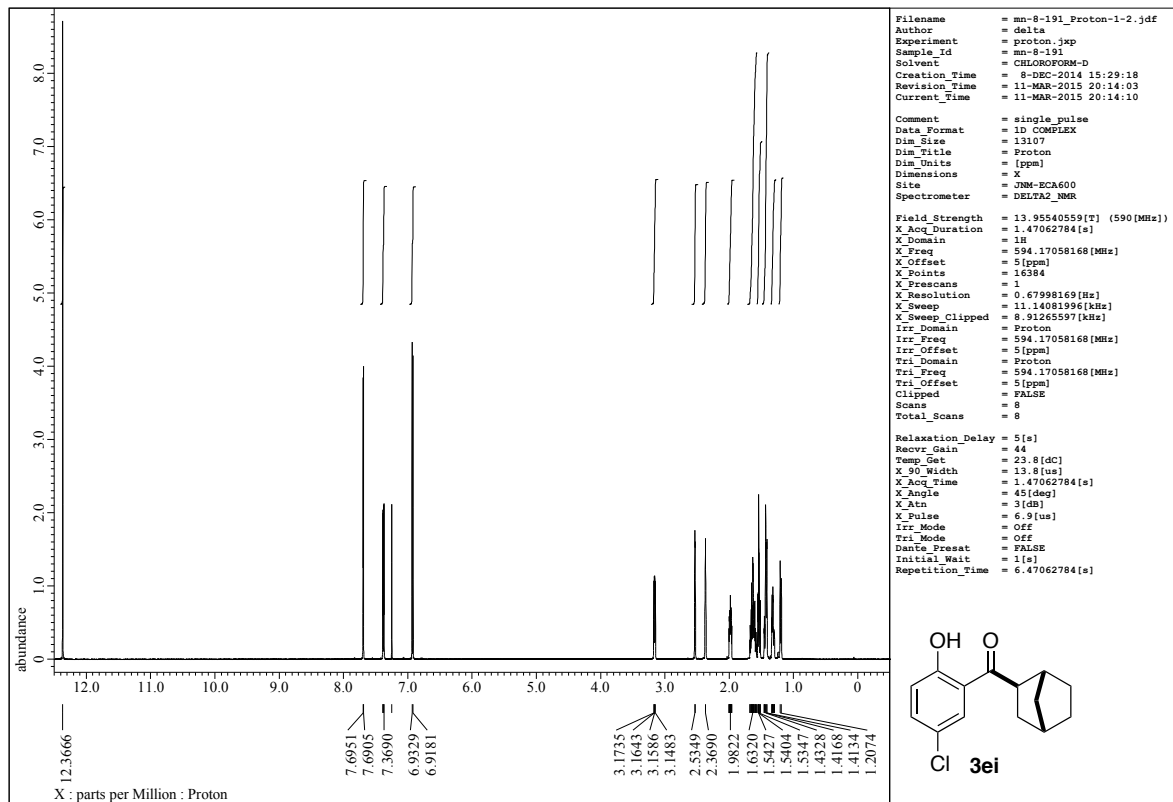

```

Filename      = mm-8-191_Proton-1-2.jdf
Author       = delta
Experiment   = proton.jxp
Sample_Id    = mm-8-191
Solvent      = CHLOROFORM-D
Creation_Time = 8-DEC-2014 15:29:18
Revision_Time = 11-MAR-2015 20:14:03
Current_Time = 11-MAR-2015 20:14:10

Comment      = single pulse
Data_Format  = 1D COMPLEX
Dim_Size     = 13107
Dim_Title    = Proton
Dim_Units    = [ppm]
Dimensions   = X
Site         = JNM-ECA600
Spectrometer = DELTA2_NMR

Field_Strength = 13.95540559[T] (590[MHz])
X_Acq_Duration = 1.47062784[s]
X_Domain       = 18
X_Freq         = 594.17058168[MHz]
X_Offset       = 5[ppm]
X_Points      = 16384
X_Prescans    = 1
X_Resolution   = 0.67998169[Hz]
X_Sweep       = 11.14081996[kHz]
X_Sweep_Clipped = 8.91265597[kHz]
Irr_Domain     = Proton
Irr_Freq       = 594.17058168[MHz]
Irr_Offset     = 5[ppm]
Tri_Domain     = Proton
Tri_Freq       = 594.17058168[MHz]
Tri_Offset     = 5[ppm]
Clipped       = FALSE
Scans         = 8

Relaxation_Delay = 5[s]
Recvr_Gain       = 44
Temp_Get        = 23.8[dc]
X_90_Width      = 13.8[us]
X_Acq_Time      = 1.47062784[s]
X_Angle         = 45[deg]
X_Atn          = 3[db]
X_Pulse        = 6.9[us]
Irr_Mode       = Off
Tri_Mode       = Off
Dante_Preset   = FALSE
Initial_Wait   = 1[s]
Repetition_Time = 6.47062784[s]
  
```

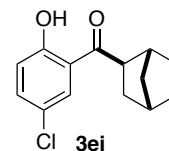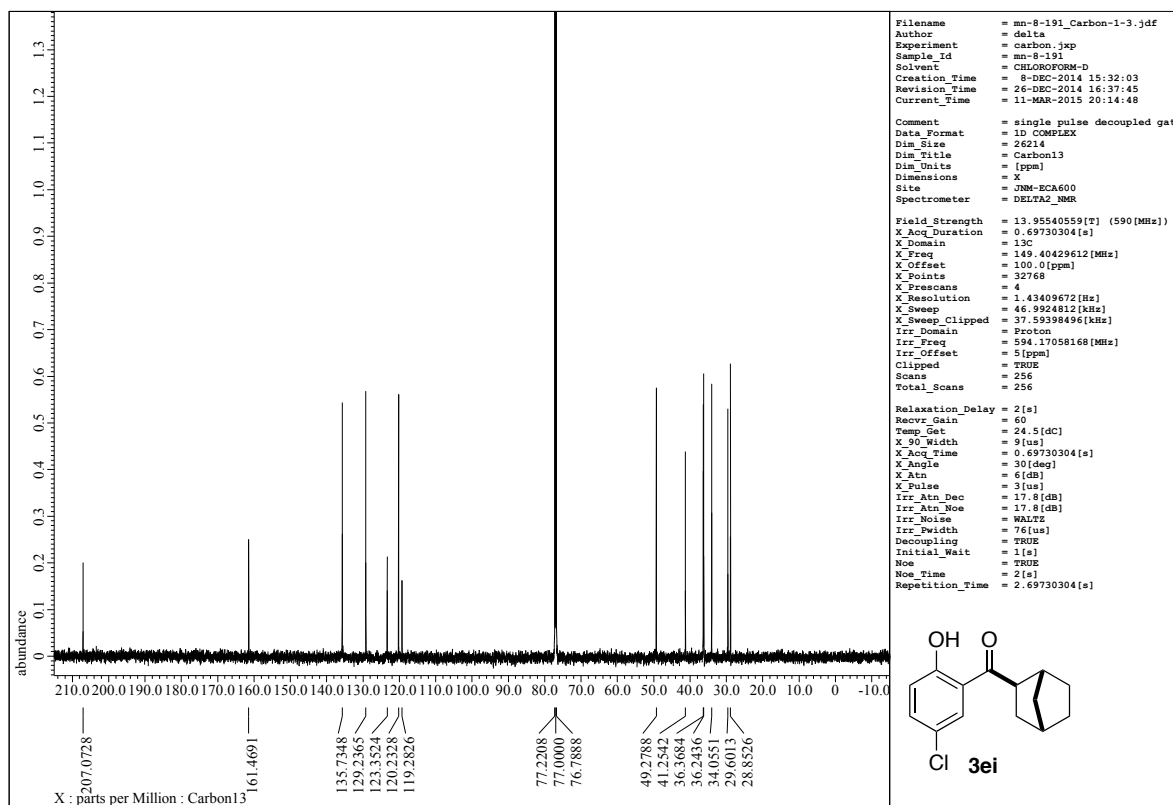

```

Filename      = mm-8-191_Carbon-1-3.jdf
Author       = delta
Experiment   = carbon.jxp
Sample_Id    = mm-8-191
Solvent      = CHLOROFORM-D
Creation_Time = 8-DEC-2014 15:32:03
Revision_Time = 26-DEC-2014 16:37:45
Current_Time = 11-MAR-2015 20:14:48

Comment      = single pulse decoupled gat
Data_Format  = 1D COMPLEX
Dim_Size     = 26214
Dim_Title    = Carbon13
Dim_Units    = [ppm]
Dimensions   = X
Site         = JNM-ECA600
Spectrometer = DELTA2_NMR

Field_Strength = 13.95540559[T] (590[MHz])
X_Acq_Duration = 0.69730304[s]
X_Domain       = 13C
X_Freq         = 149.40429612[MHz]
X_Offset       = 100.0[ppm]
X_Points      = 32768
X_Prescans    = 4
X_Resolution   = 1.43409672[Hz]
X_Sweep       = 46.9324812[kHz]
X_Sweep_Clipped = 37.59398496[kHz]
Irr_Domain     = Proton
Irr_Freq       = 594.17058168[MHz]
Irr_Offset     = 5[ppm]
Clipped       = TRUE
Scans         = 256
Total_Scans   = 256

Relaxation_Delay = 2[s]
Recvr_Gain       = 60
Temp_Get        = 24.5[dc]
X_90_Width      = 9[us]
X_Acq_Time      = 0.69730304[s]
X_Angle         = 30[deg]
X_Atn          = 6[db]
X_Pulse        = 3[us]
Irr_Atn_Dec    = 17.8[db]
Irr_Atn_Noise = 17.8[db]
Irr_Noise     = WALTZ
Irr_Width      = 76[us]
Decoupling     = TRUE
Initial_Wait   = 1[s]
Noe            = TRUE
Noe_Time       = 2[s]
Repetition_Time = 2.69730304[s]
  
```

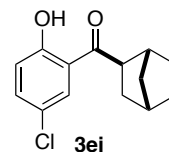

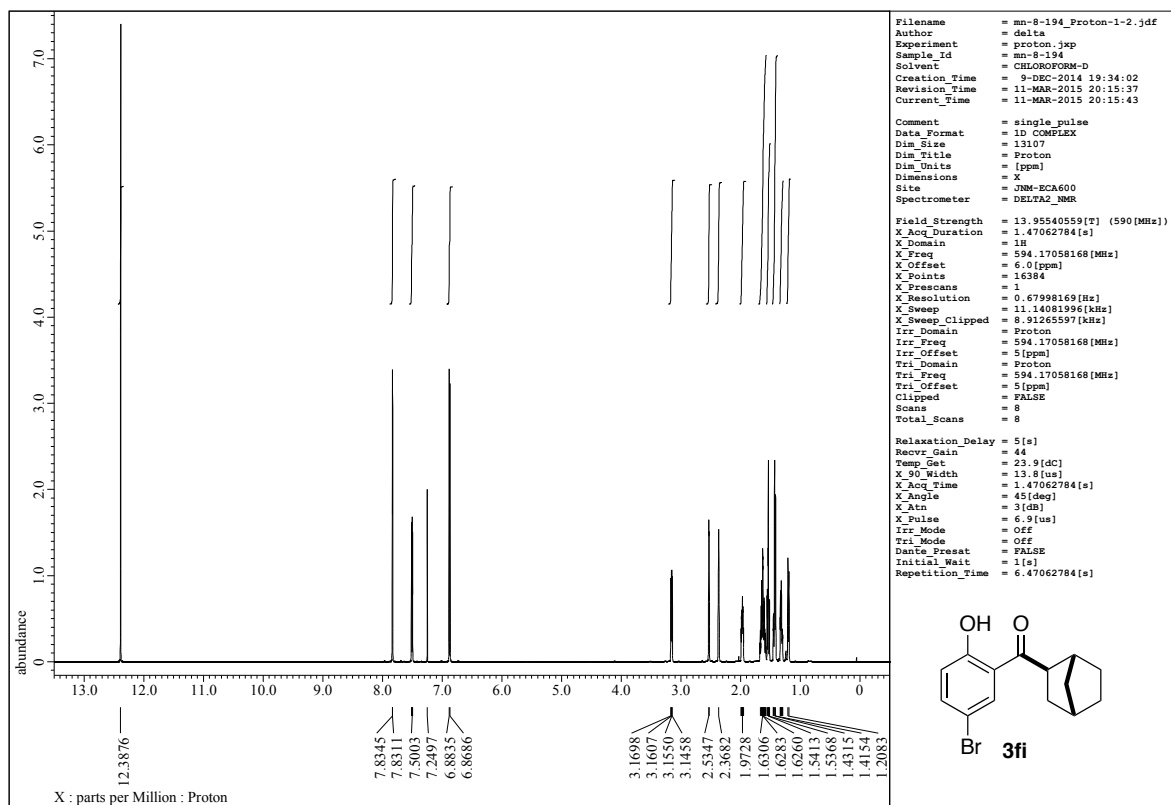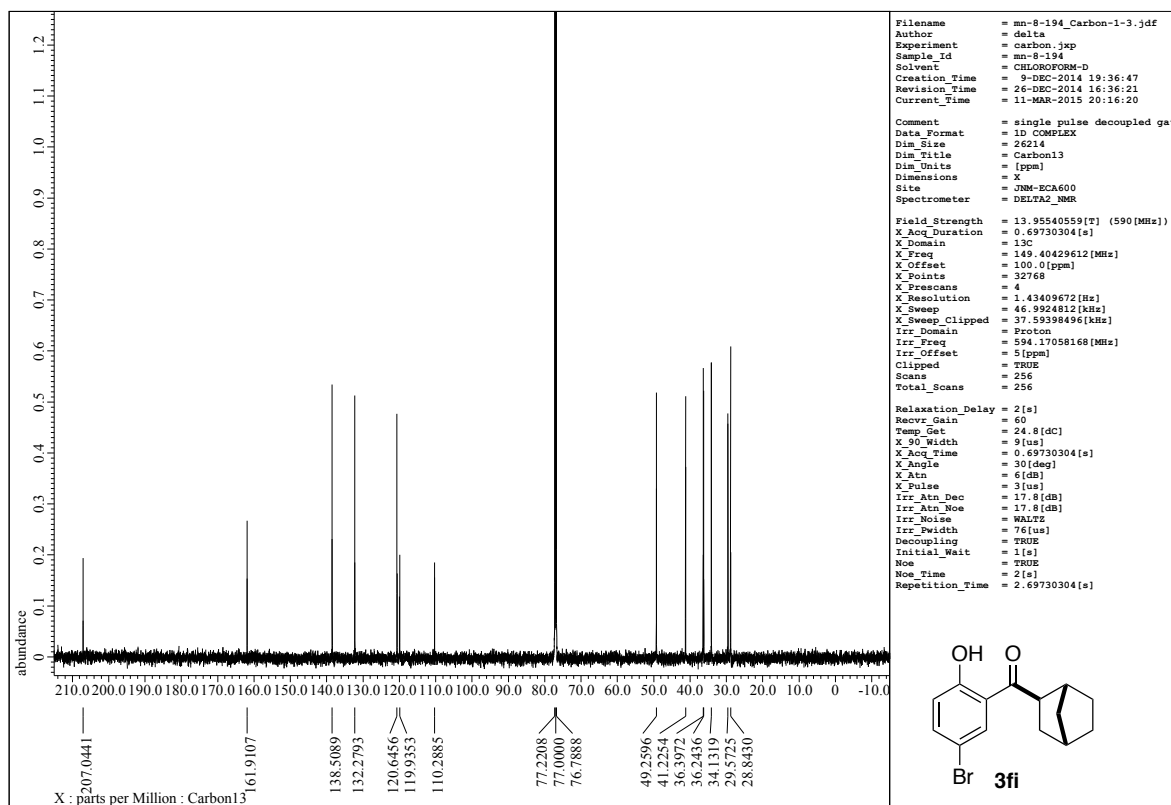



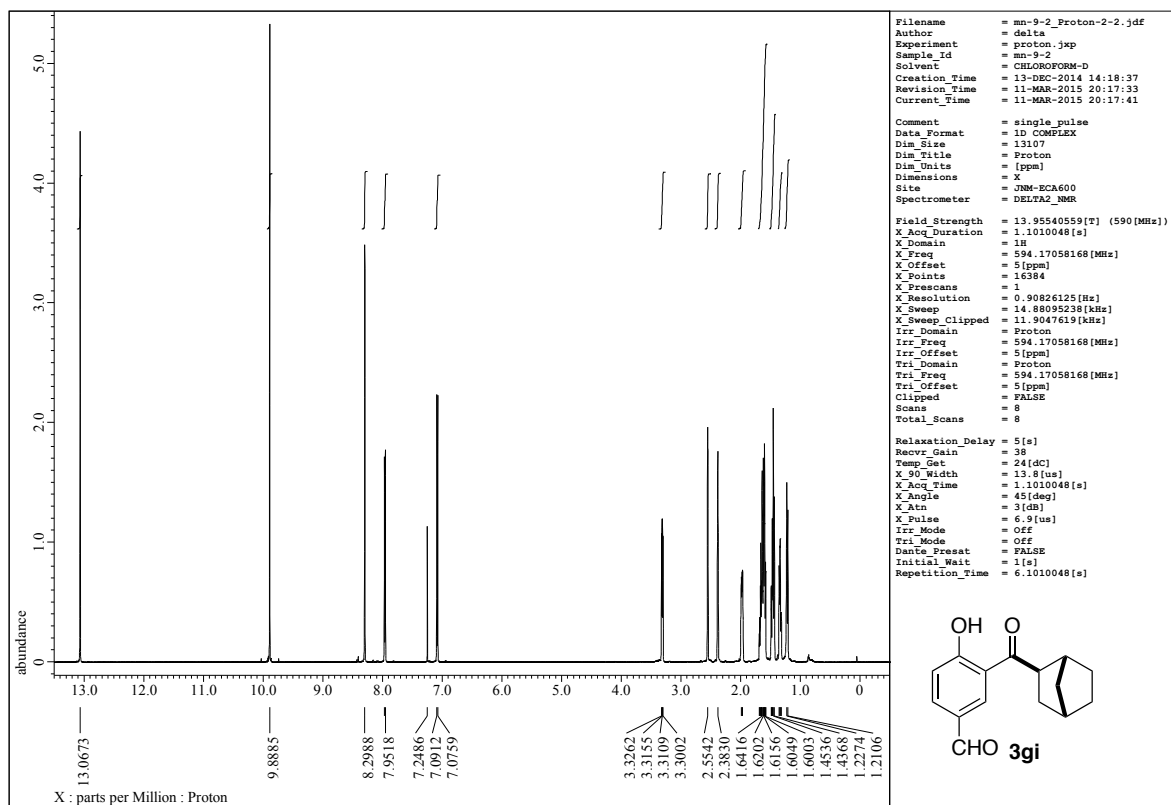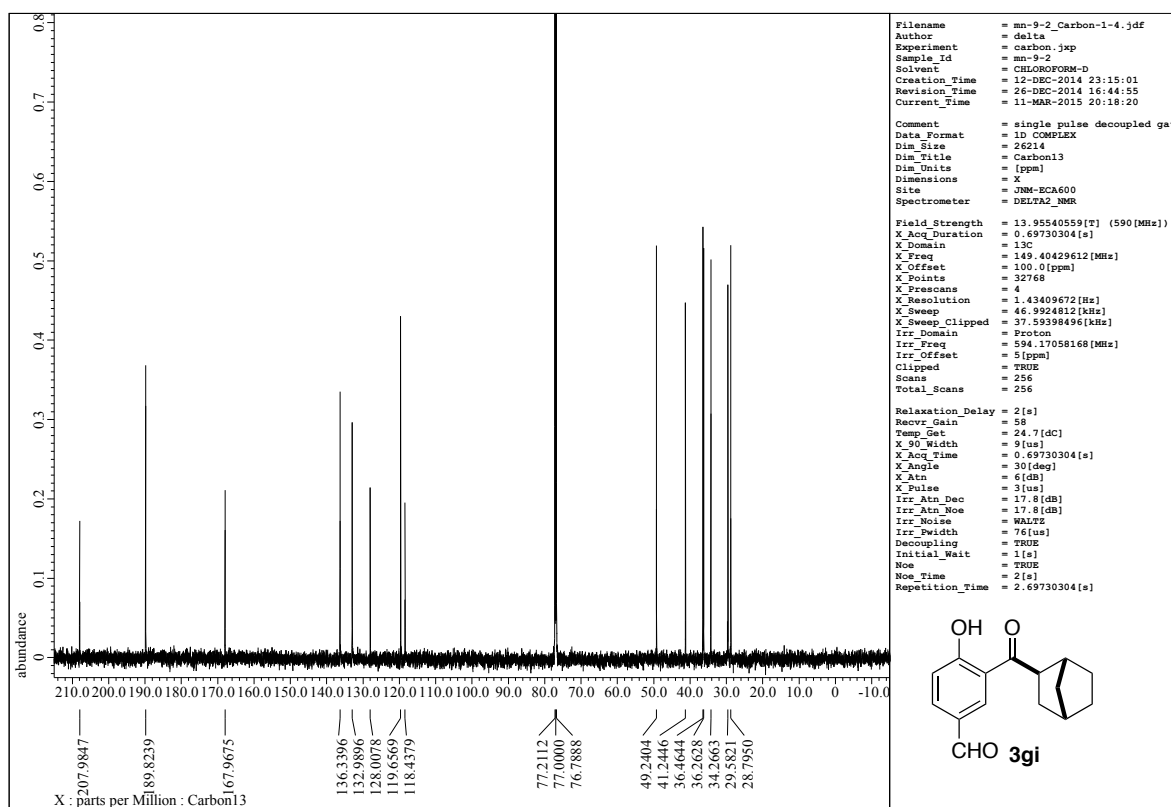

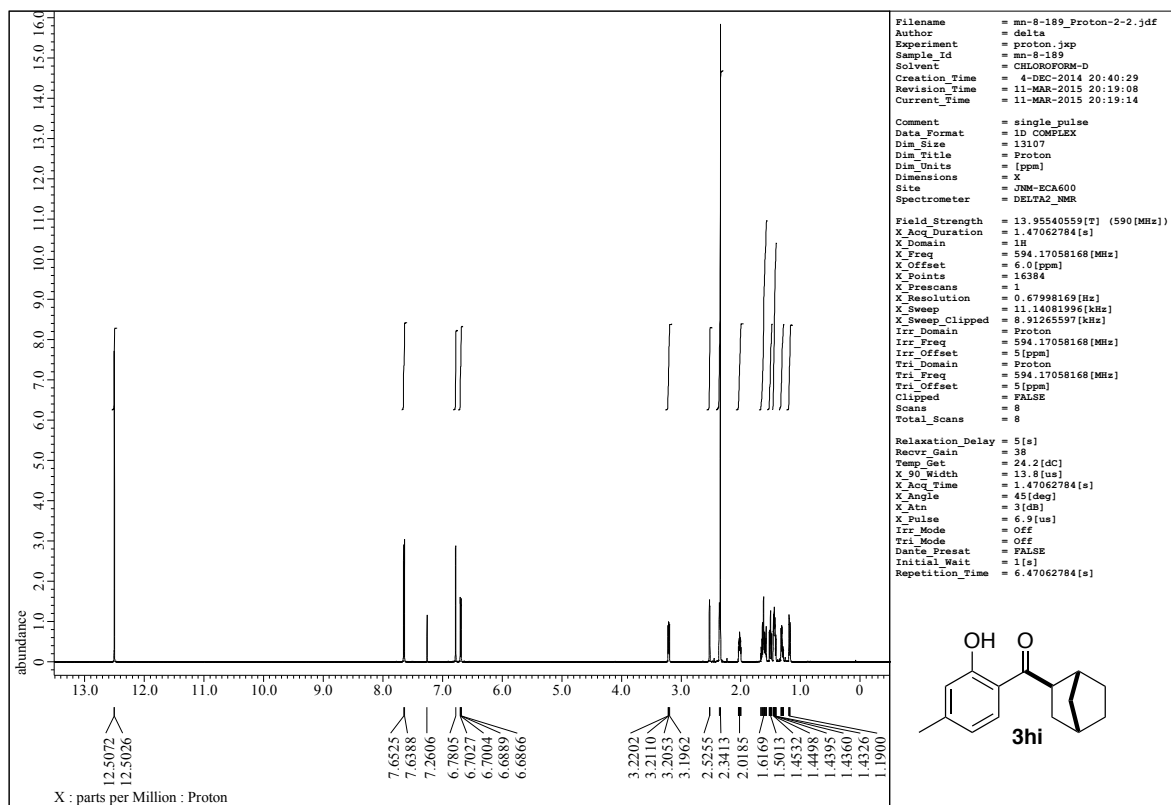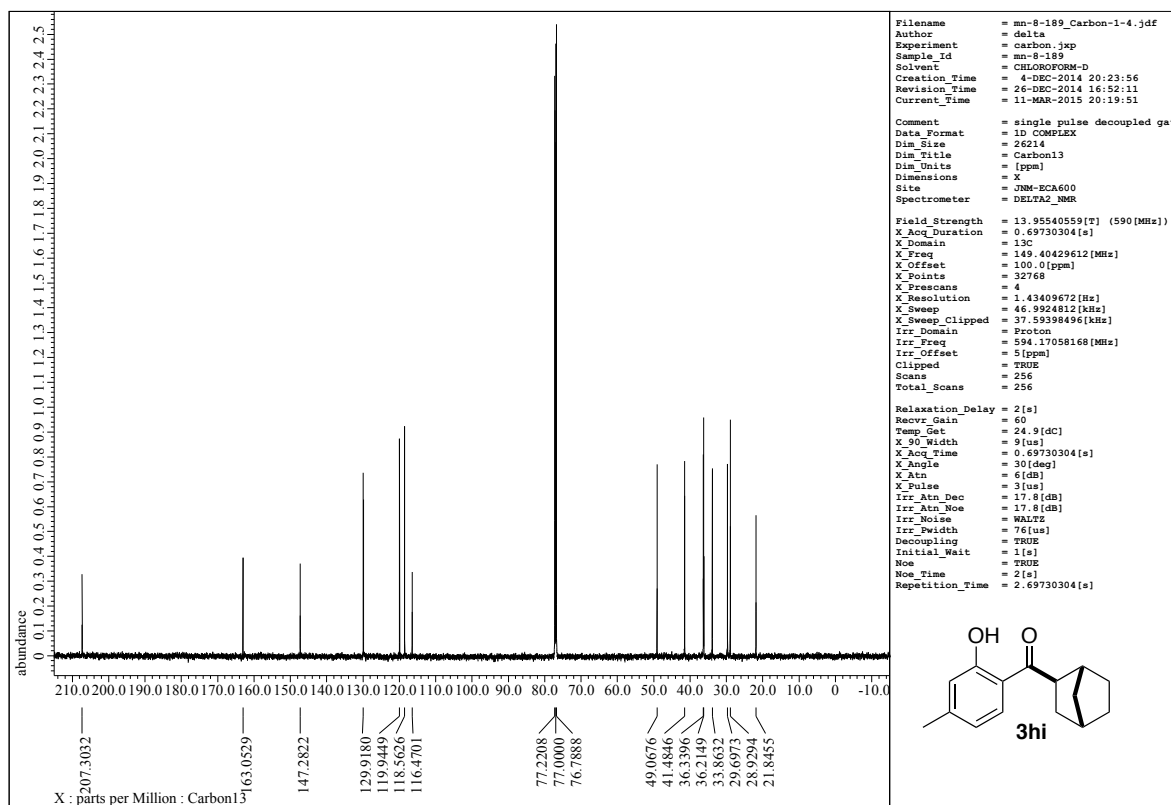

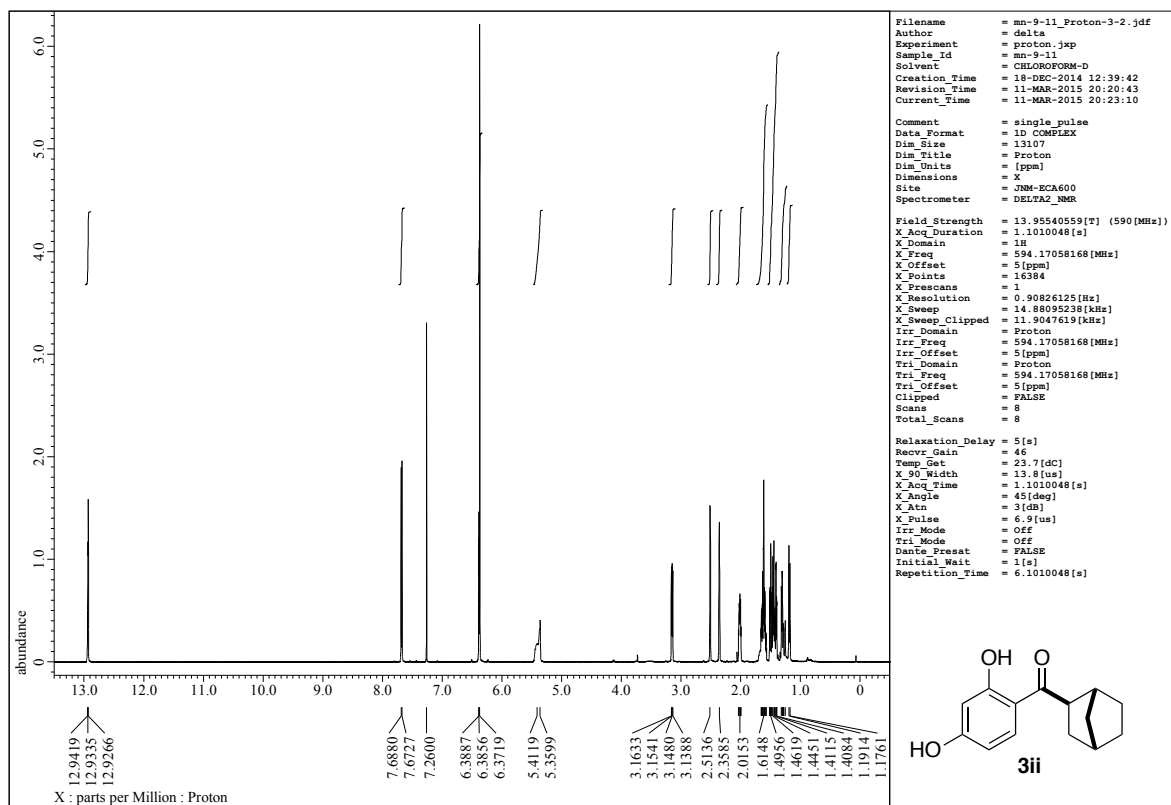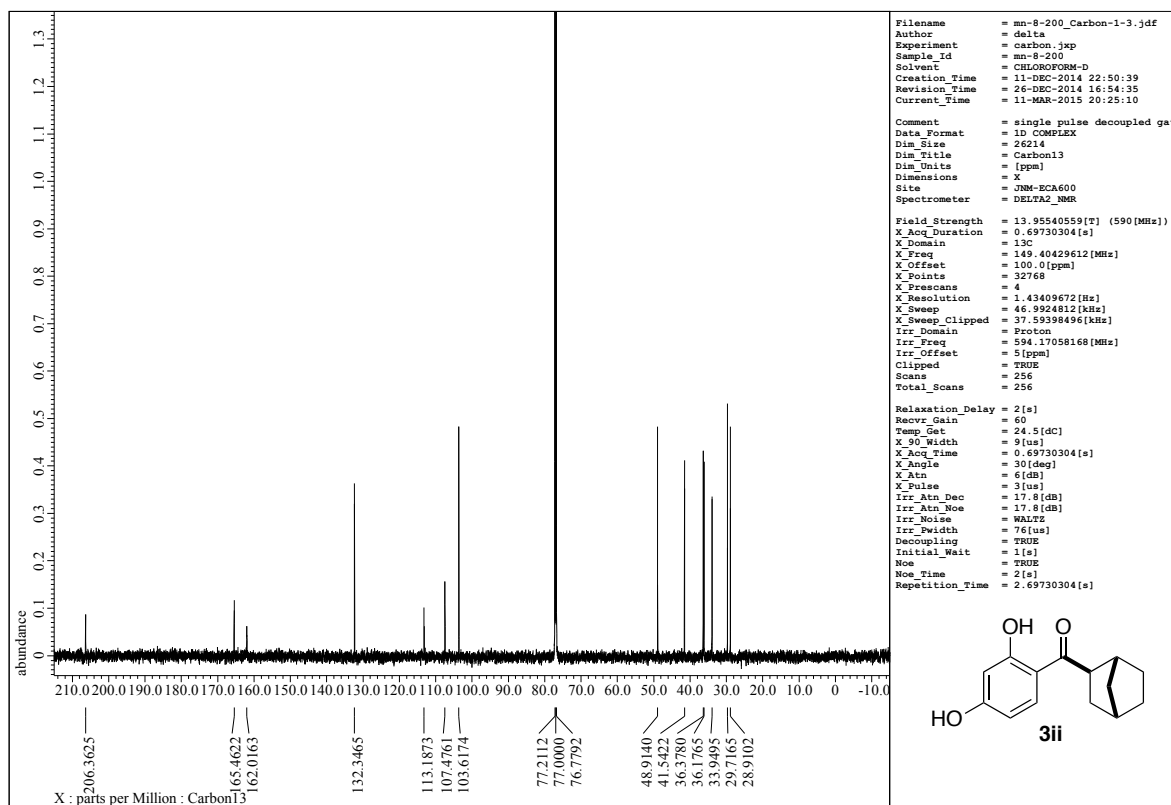

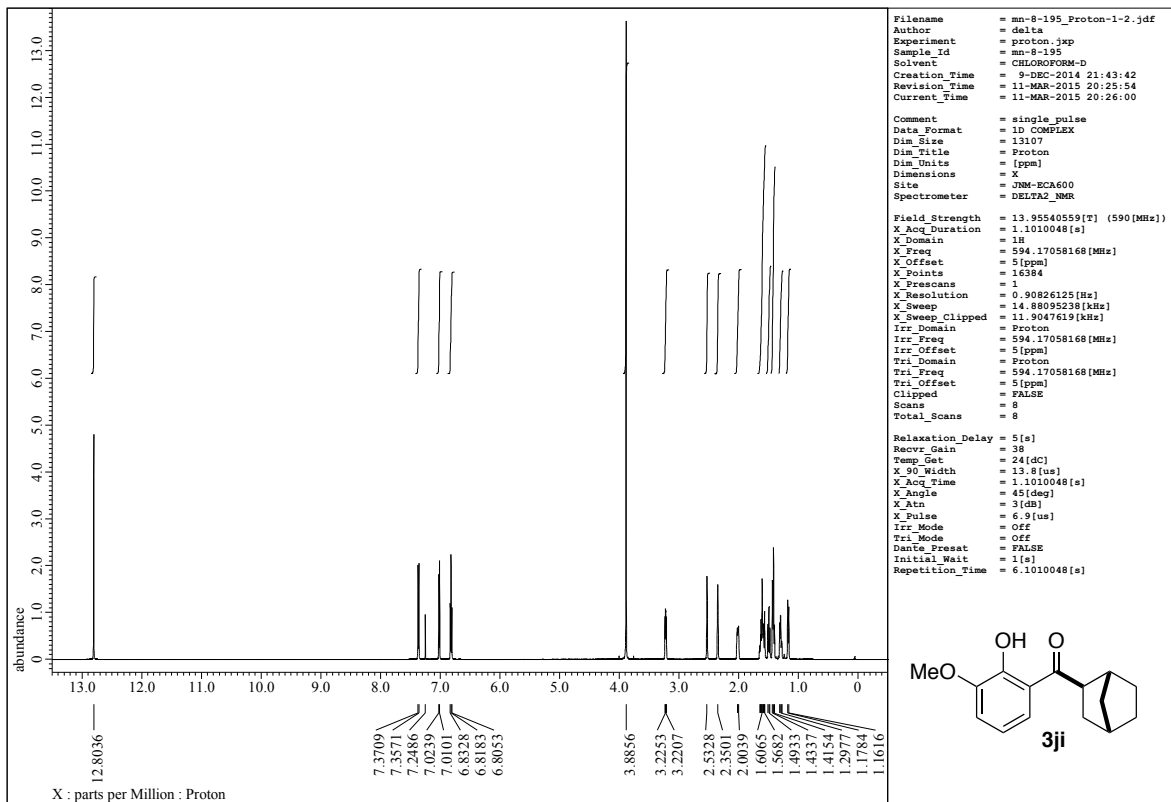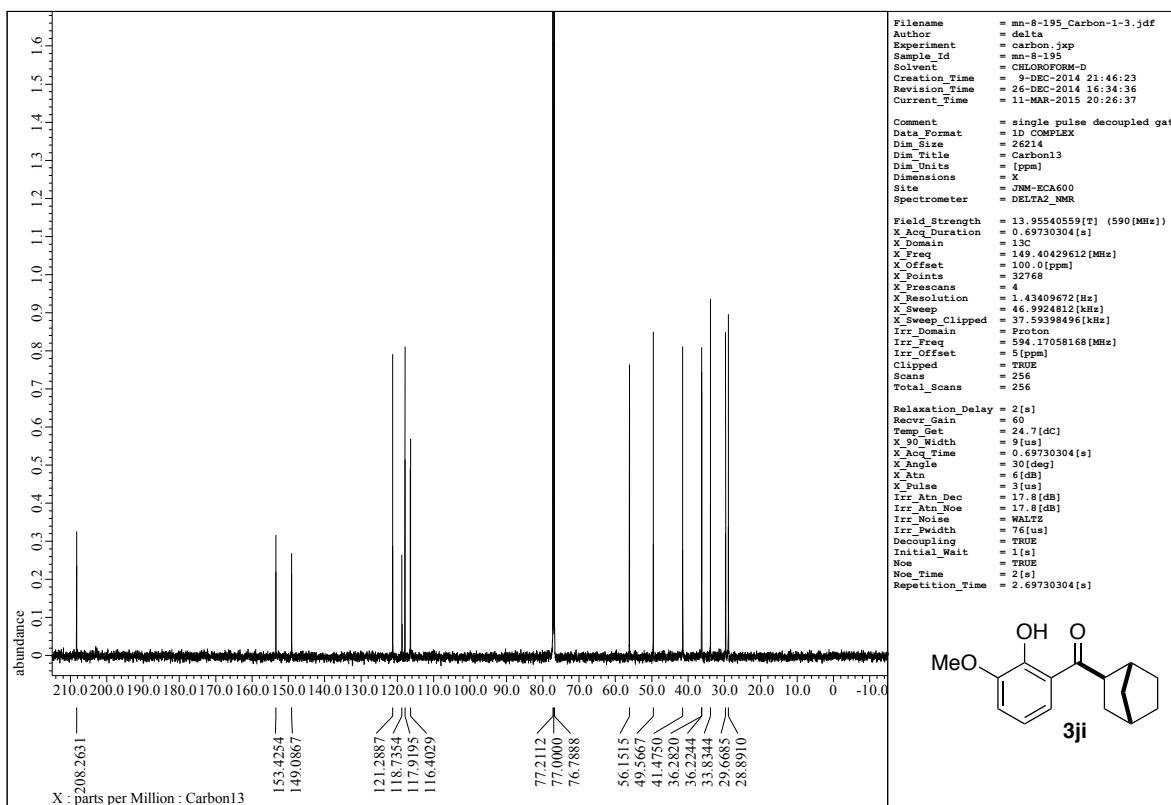

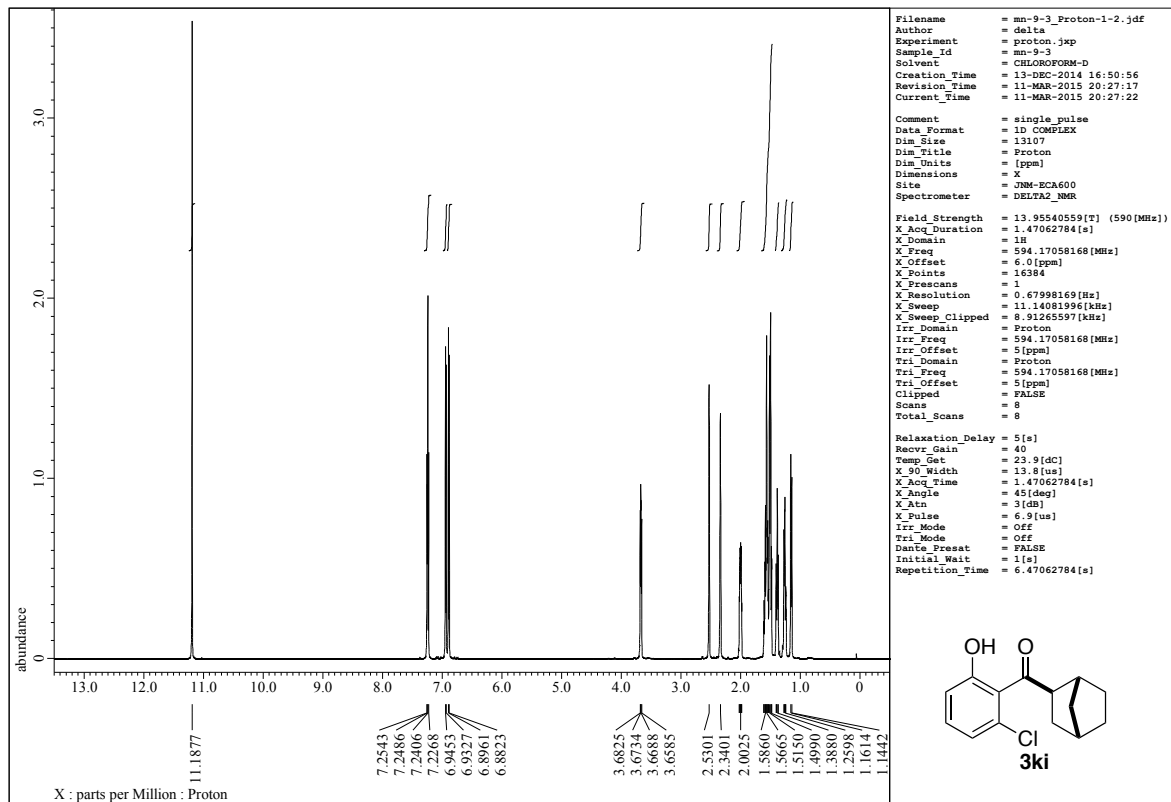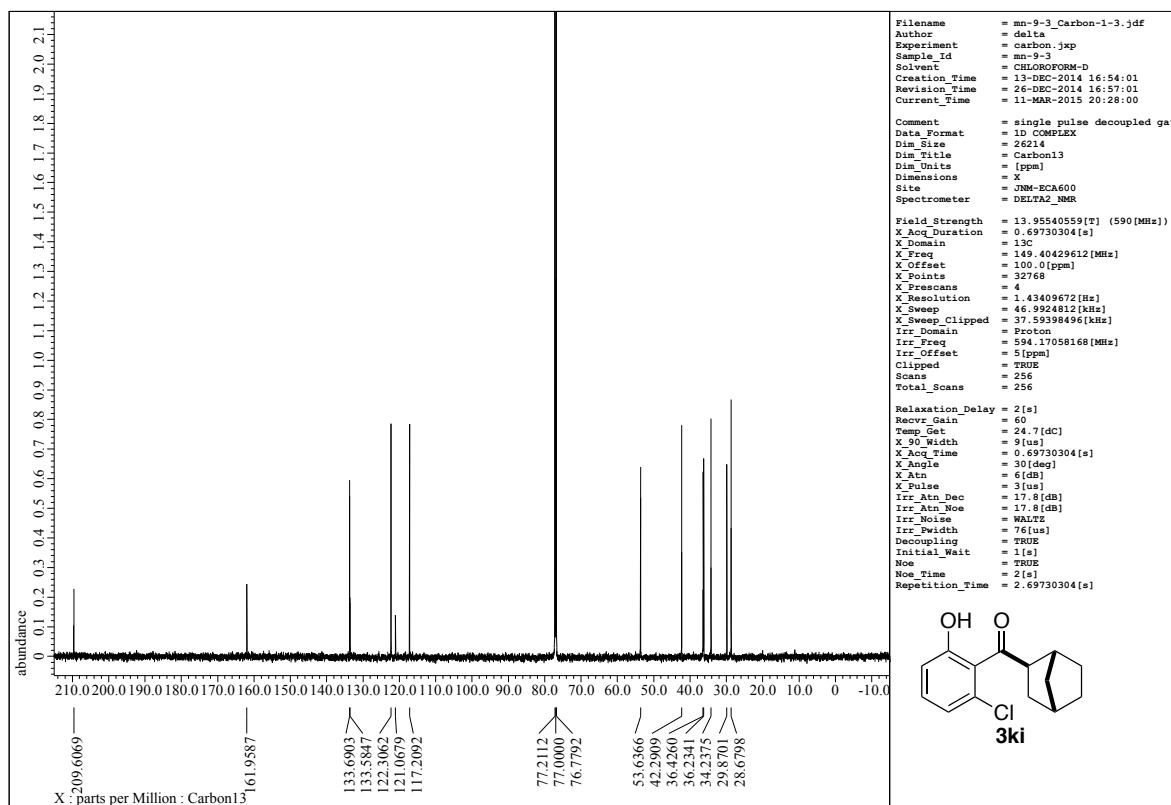

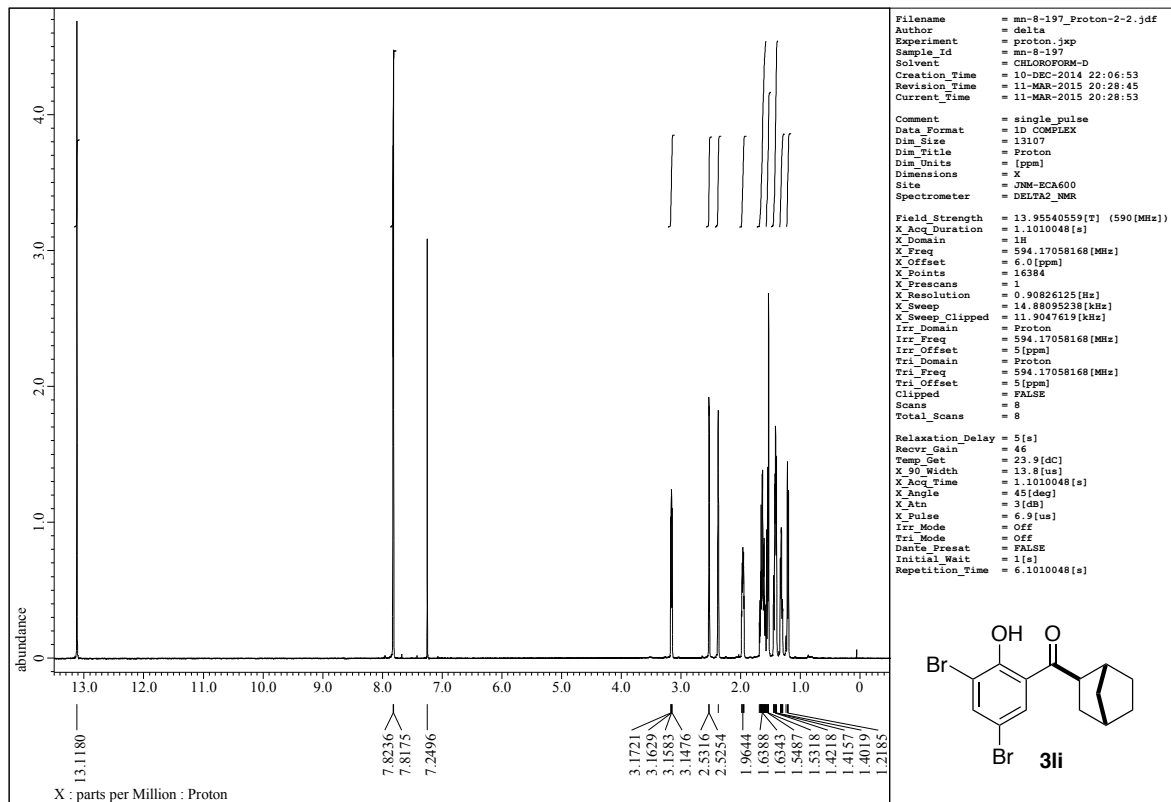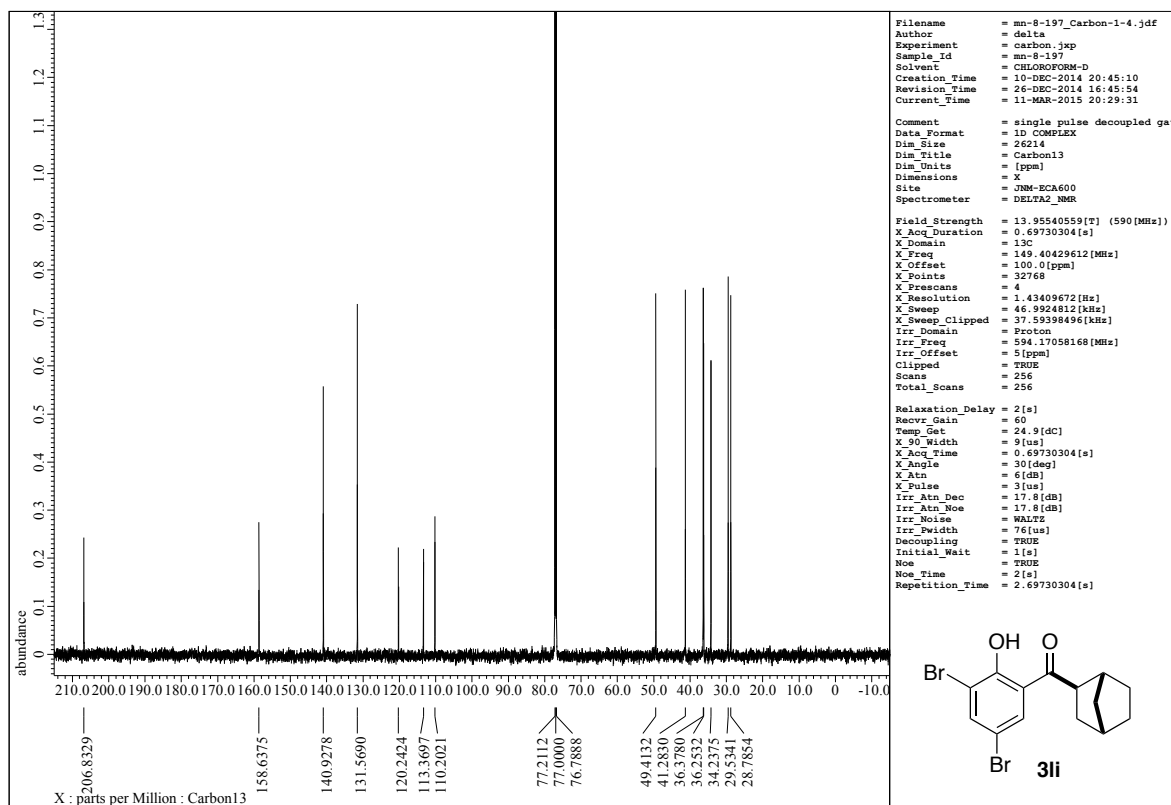

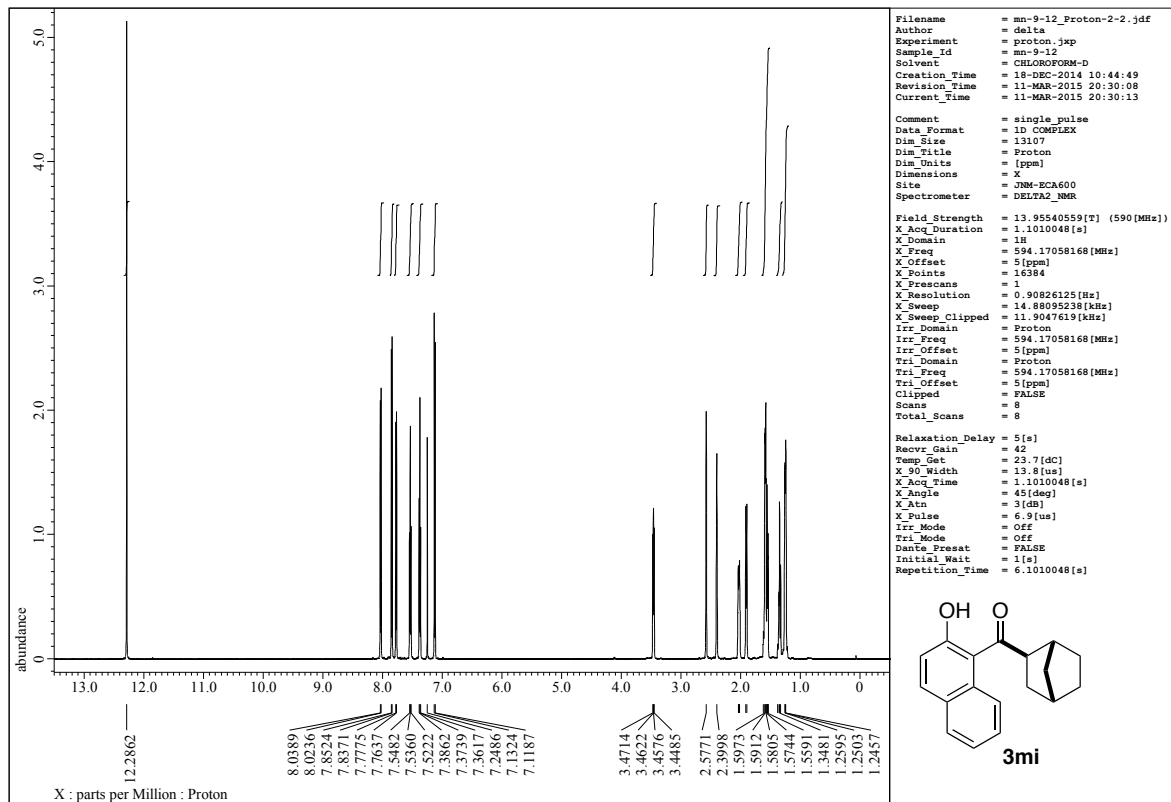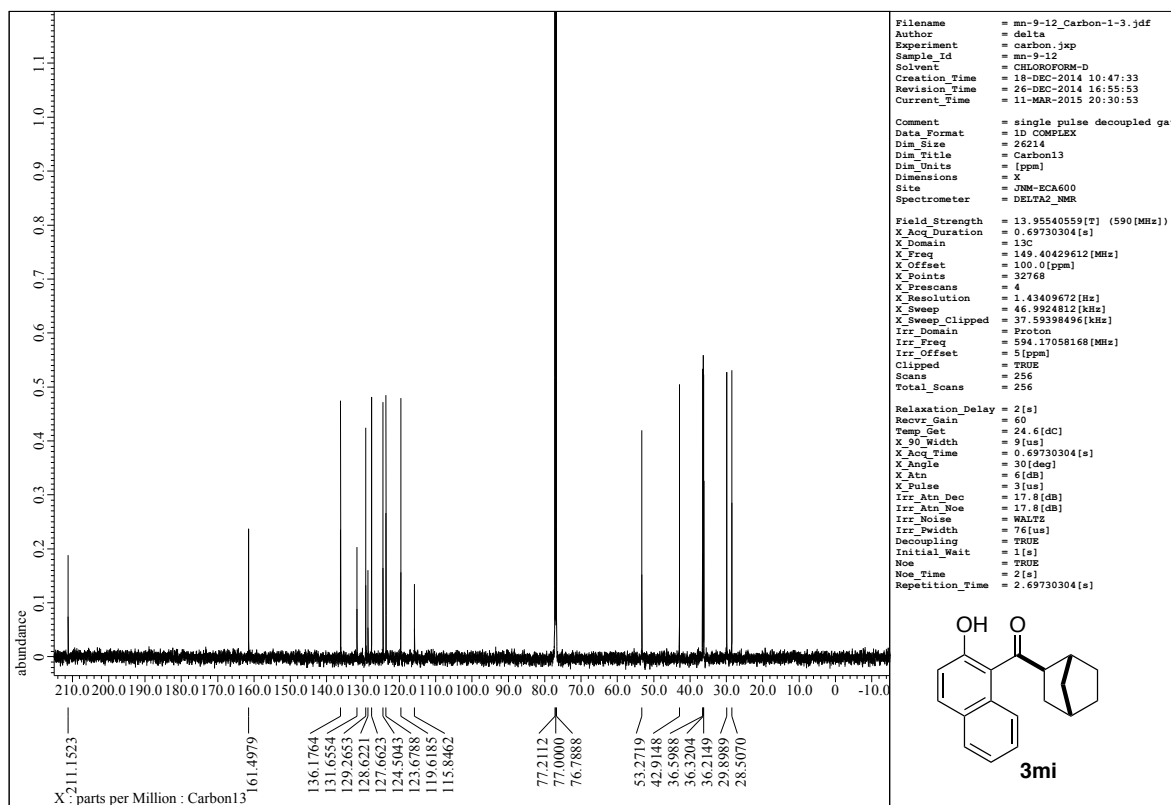

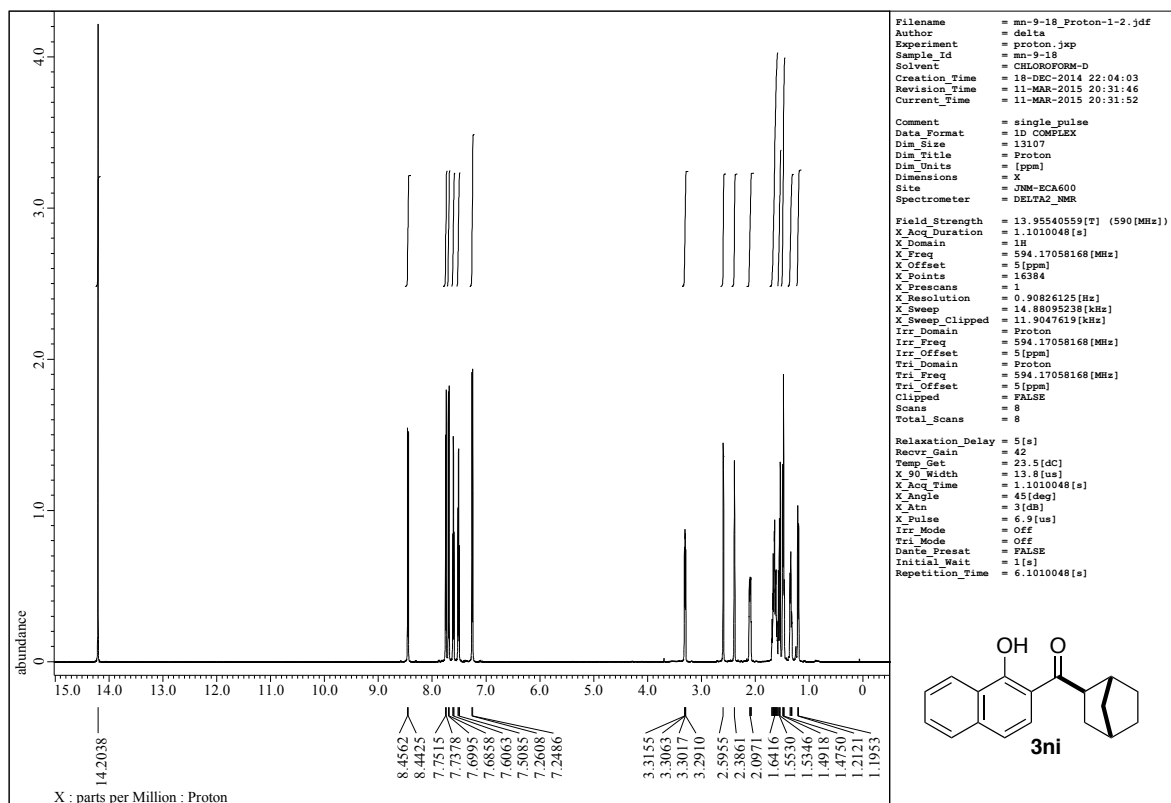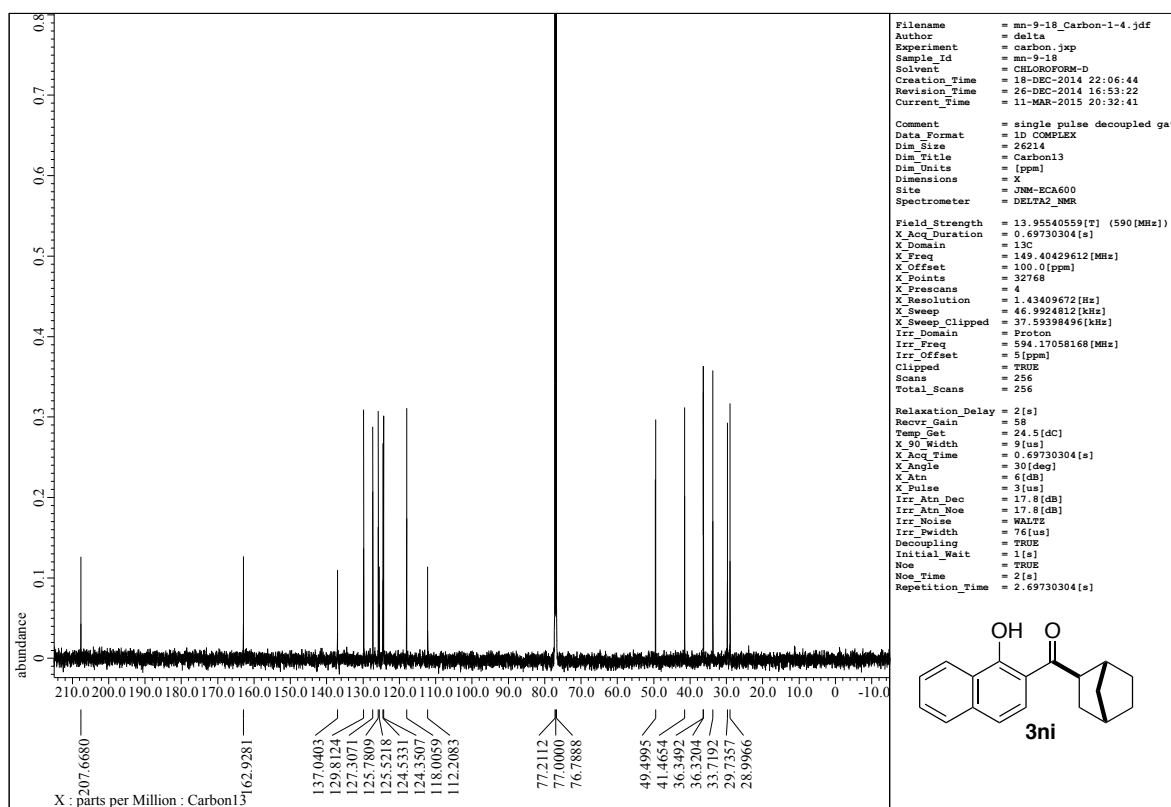



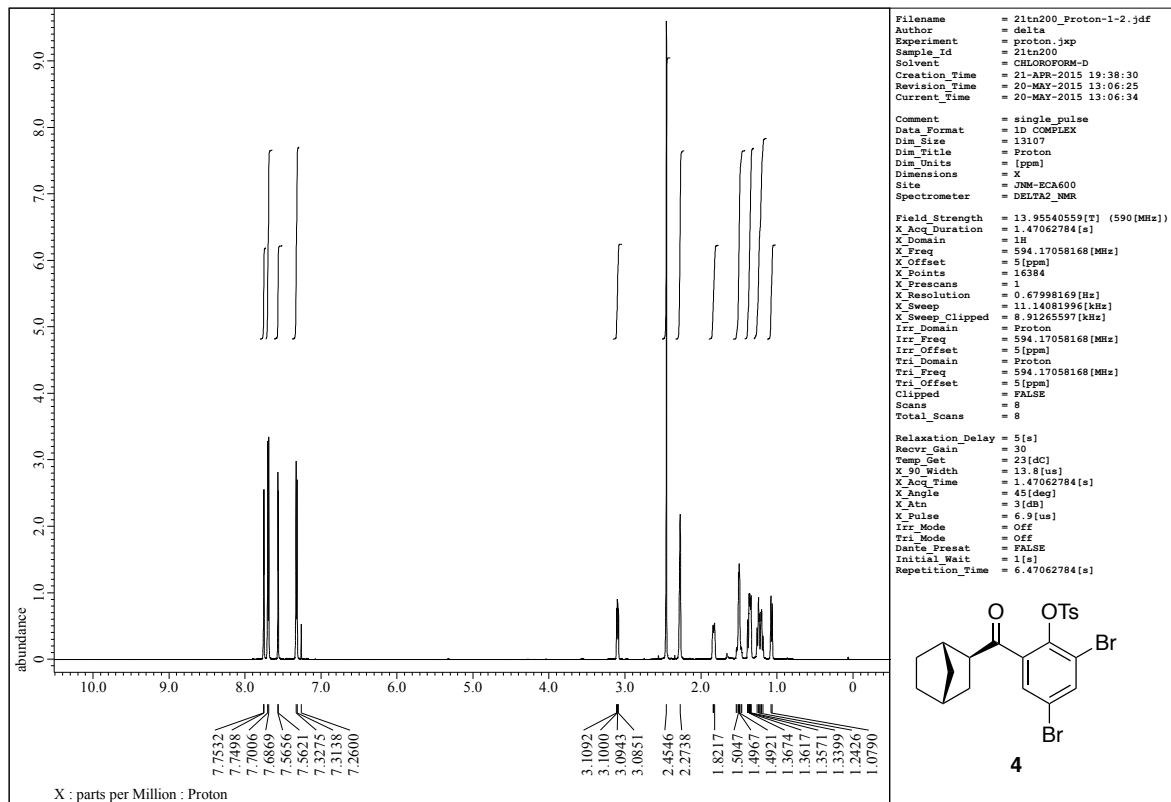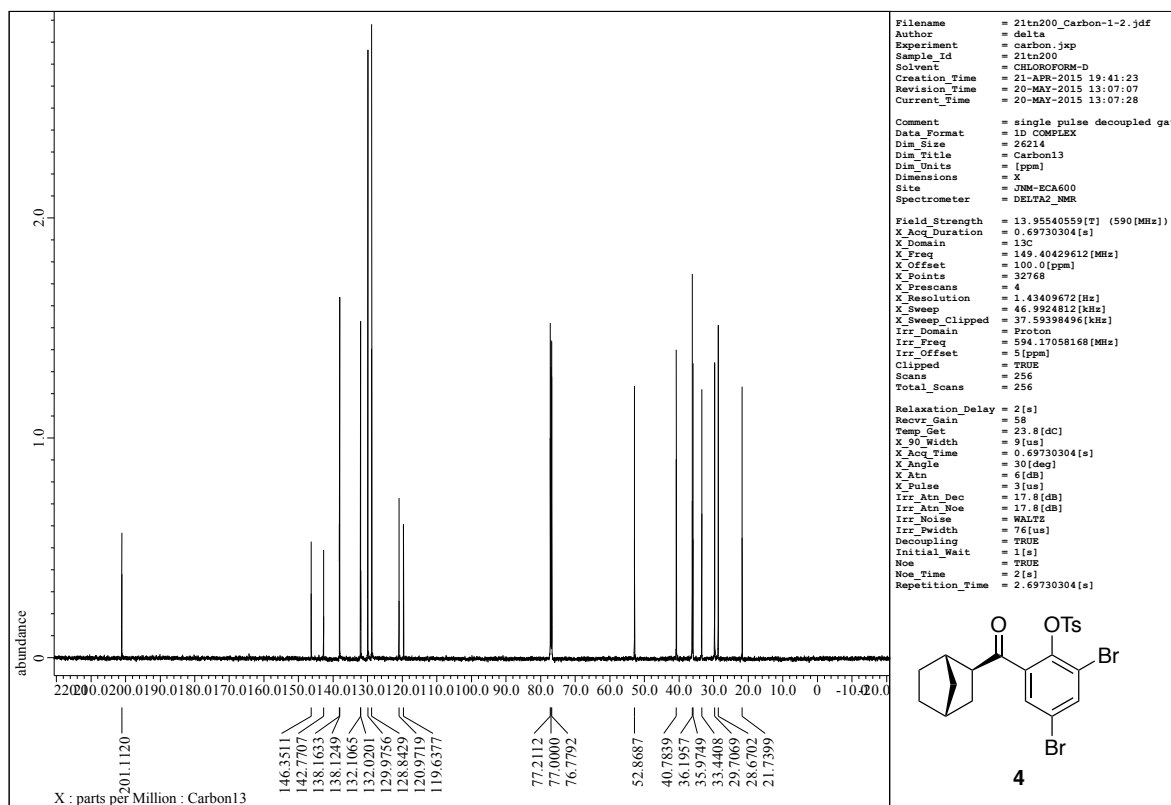

## 14. Chiral HPLC charts

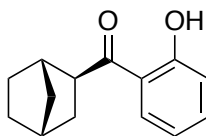

**3ai**

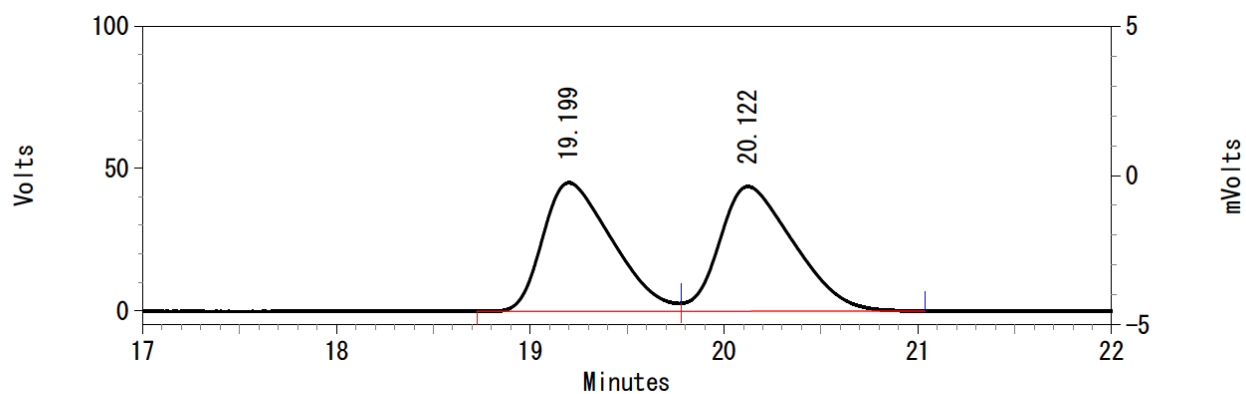

### UV-970 Results

| Pk # | Retention Time | Area    | Area Percent | Height |
|------|----------------|---------|--------------|--------|
| 1    | 19.199         | 1128167 | 49.265       | 45187  |
| 2    | 20.122         | 1161810 | 50.735       | 43855  |

|        |  |         |         |       |
|--------|--|---------|---------|-------|
| Totals |  | 2289977 | 100.000 | 89042 |
|--------|--|---------|---------|-------|

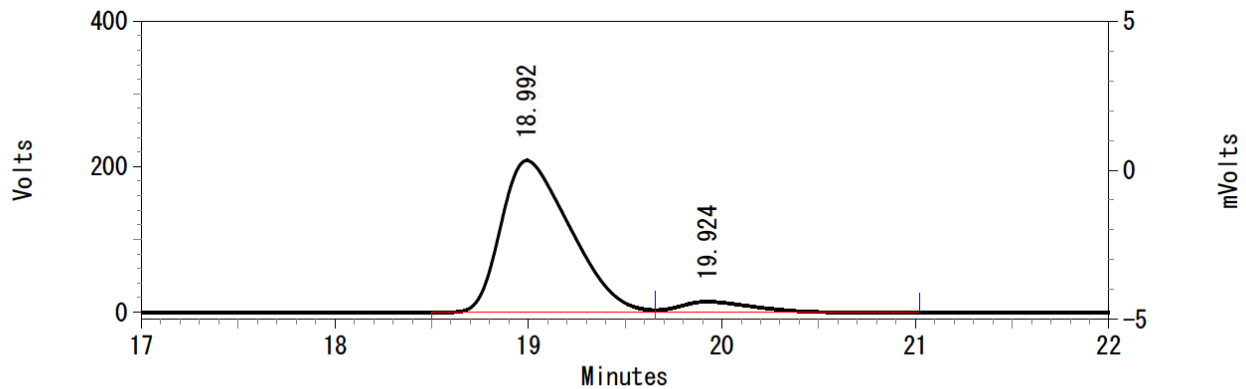

### UV-970 Results

| Pk # | Retention Time | Area    | Area Percent | Height |
|------|----------------|---------|--------------|--------|
| 1    | 18.992         | 5184274 | 93.059       | 208566 |
| 2    | 19.924         | 386680  | 6.941        | 14757  |

|        |  |         |         |        |
|--------|--|---------|---------|--------|
| Totals |  | 5570954 | 100.000 | 223323 |
|--------|--|---------|---------|--------|

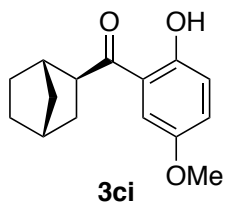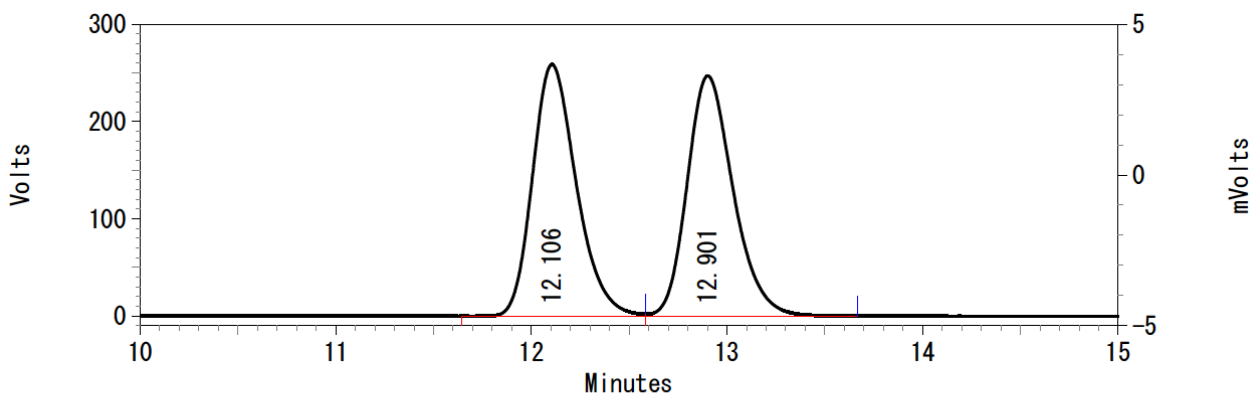

**UV Results**

| Pk # | Retention Time | Area    | Area Percent | Height |
|------|----------------|---------|--------------|--------|
| 1    | 12.106         | 4035086 | 49.925       | 258846 |
| 2    | 12.901         | 4047194 | 50.075       | 247053 |

|        |  |         |         |        |
|--------|--|---------|---------|--------|
| Totals |  | 8082280 | 100.000 | 505899 |
|--------|--|---------|---------|--------|

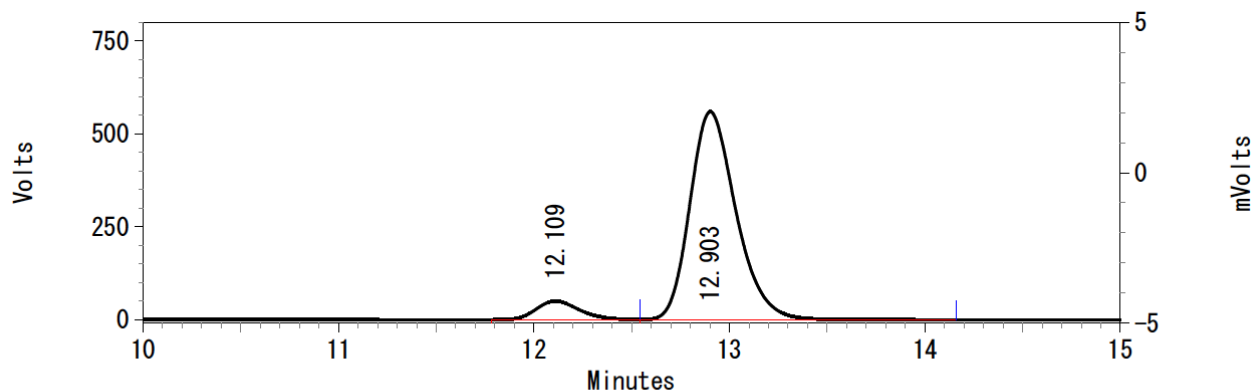

**UV Results**

| Pk # | Retention Time | Area    | Area Percent | Height |
|------|----------------|---------|--------------|--------|
| 1    | 12.109         | 786538  | 7.884        | 50502  |
| 2    | 12.903         | 9190447 | 92.116       | 559730 |

|        |  |         |         |        |
|--------|--|---------|---------|--------|
| Totals |  | 9976985 | 100.000 | 610232 |
|--------|--|---------|---------|--------|

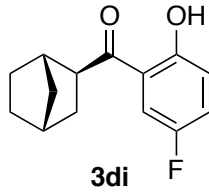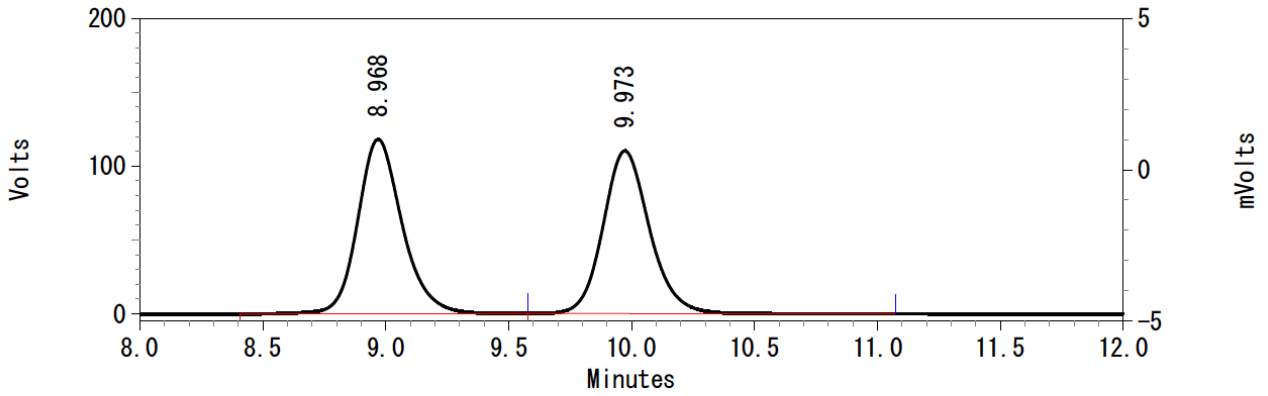

**UV Results**

| Pk #   | Retention Time | Area    | Area Percent | Height |
|--------|----------------|---------|--------------|--------|
| 1      | 8.968          | 1488954 | 50.629       | 118114 |
| 2      | 9.973          | 1451946 | 49.371       | 110186 |
| Totals |                | 2940900 | 100.000      | 228300 |

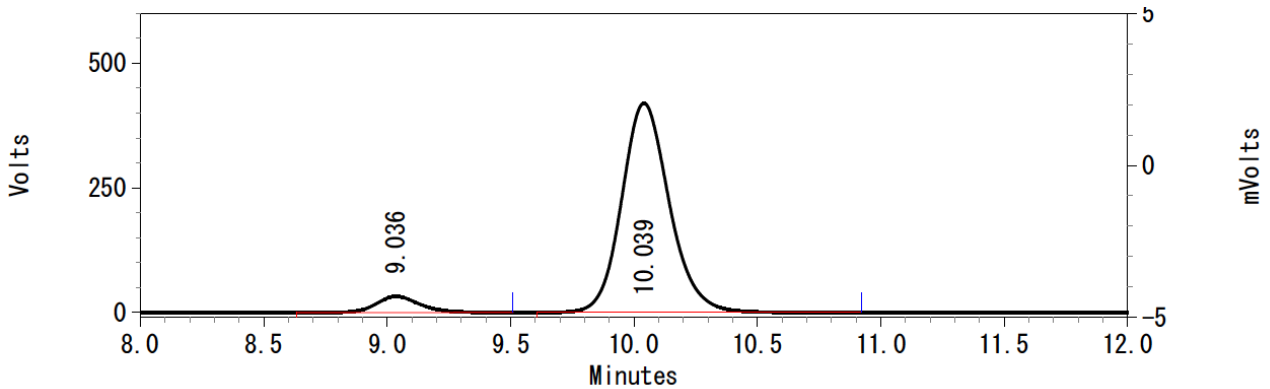

**UV Results**

| Pk #   | Retention Time | Area    | Area Percent | Height |
|--------|----------------|---------|--------------|--------|
| 1      | 9.036          | 399315  | 6.616        | 32333  |
| 2      | 10.039         | 5636387 | 93.384       | 419666 |
| Totals |                | 6035702 | 100.000      | 451999 |

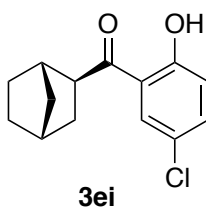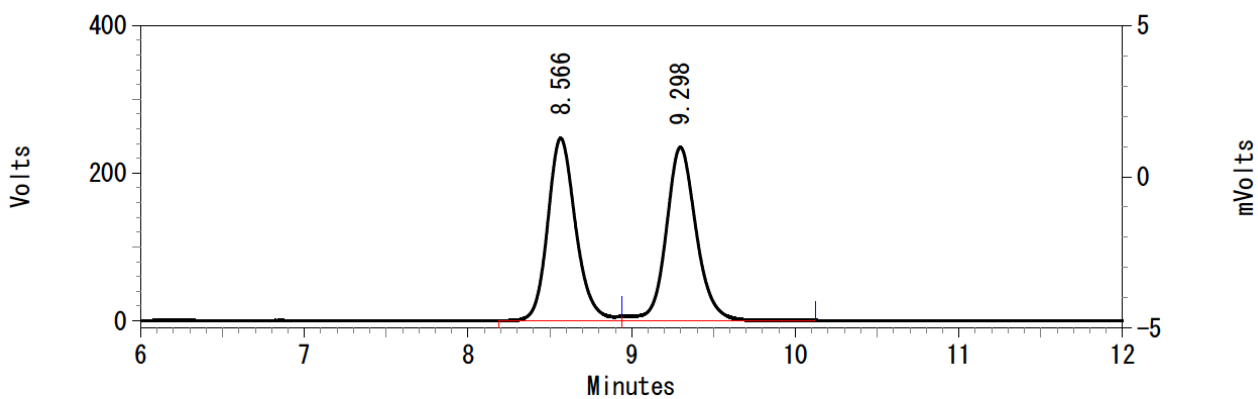

**UV Results**

| Pk #   | Retention Time | Area    | Area Percent | Height |
|--------|----------------|---------|--------------|--------|
| 1      | 8.566          | 2943189 | 49.511       | 247323 |
| 2      | 9.298          | 3001288 | 50.489       | 234892 |
| Totals |                | 5944477 | 100.000      | 482215 |

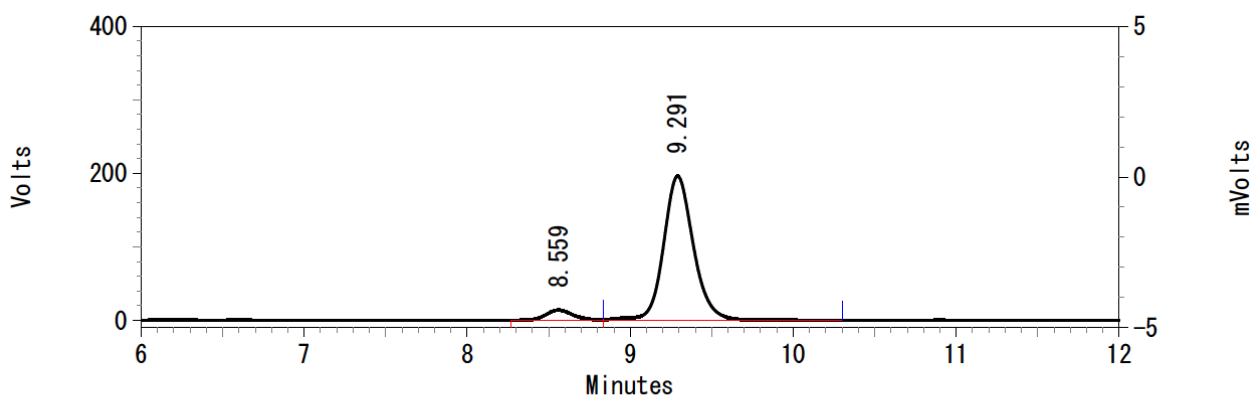

**UV Results**

| Pk #   | Retention Time | Area    | Area Percent | Height |
|--------|----------------|---------|--------------|--------|
| 1      | 8.559          | 165380  | 6.197        | 13963  |
| 2      | 9.291          | 2503190 | 93.803       | 196064 |
| Totals |                | 2668570 | 100.000      | 210027 |

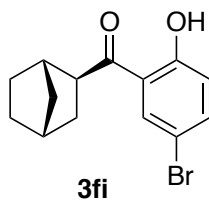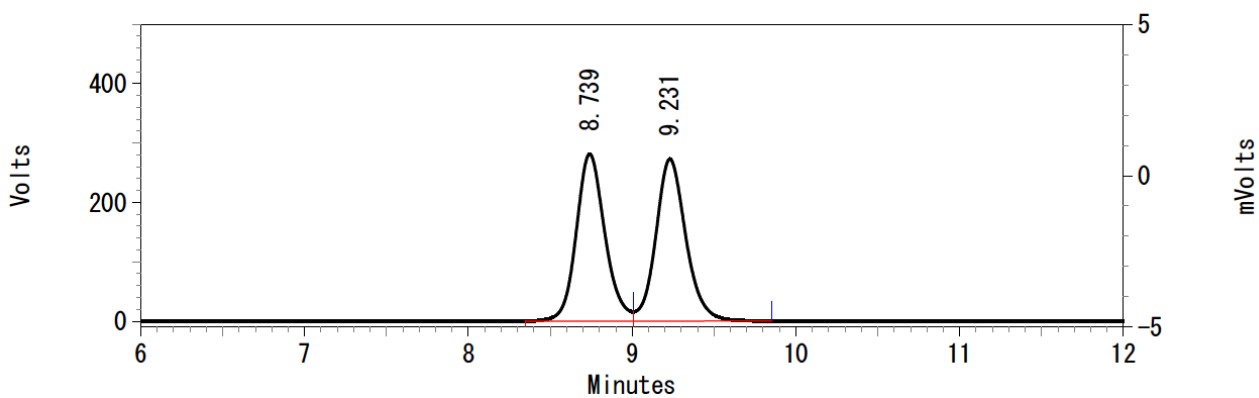

**UV Results**

| Pk # | Retention Time | Area    | Area Percent | Height |
|------|----------------|---------|--------------|--------|
| 1    | 8.739          | 3418389 | 49.584       | 281405 |
| 2    | 9.231          | 3475749 | 50.416       | 273031 |

|        |  |         |         |        |
|--------|--|---------|---------|--------|
| Totals |  | 6894138 | 100.000 | 554436 |
|--------|--|---------|---------|--------|

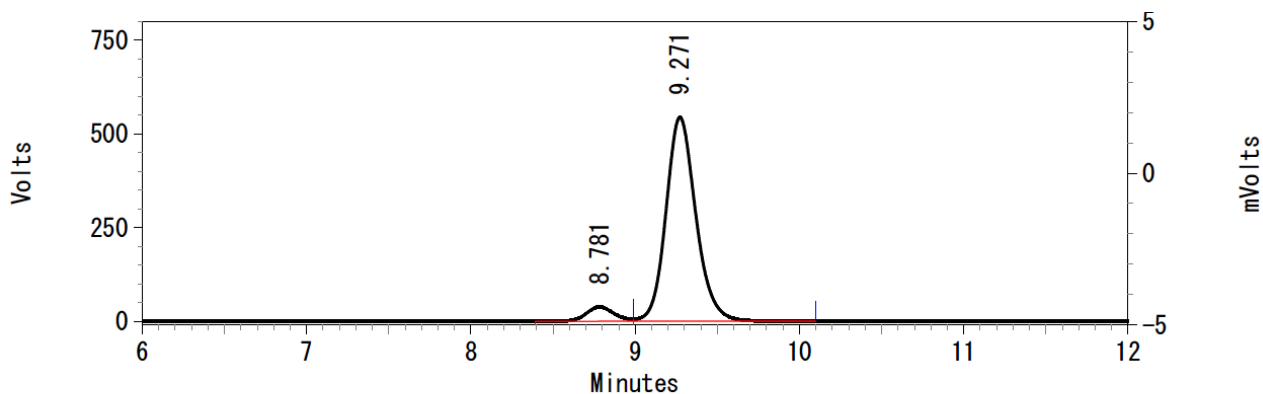

**UV Results**

| Pk # | Retention Time | Area    | Area Percent | Height |
|------|----------------|---------|--------------|--------|
| 1    | 8.781          | 459774  | 6.259        | 38550  |
| 2    | 9.271          | 6886334 | 93.741       | 543782 |

|        |  |         |         |        |
|--------|--|---------|---------|--------|
| Totals |  | 7346108 | 100.000 | 582332 |
|--------|--|---------|---------|--------|

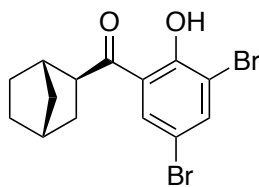

**3li**

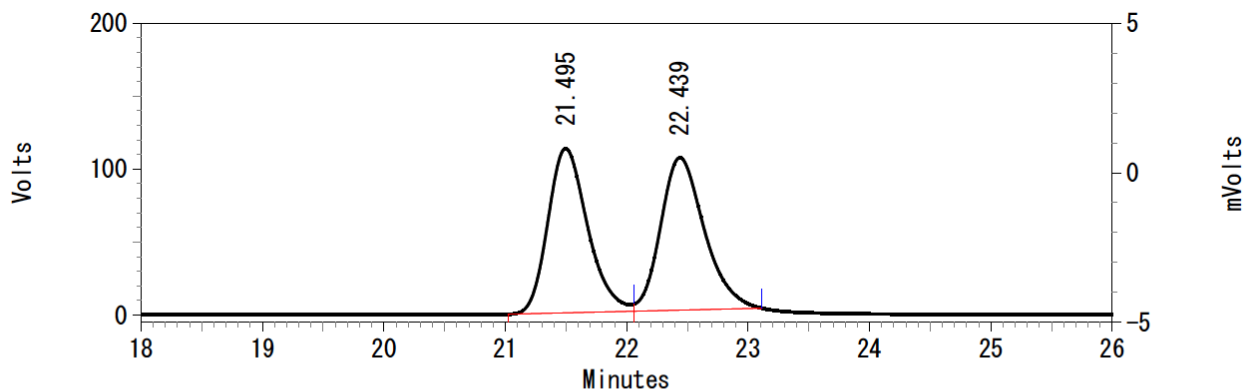

**UV-970 Results**

| Pk # | Retention Time | Area    | Area Percent | Height |
|------|----------------|---------|--------------|--------|
| 1    | 21.495         | 2562183 | 49.456       | 112683 |
| 2    | 22.439         | 2618560 | 50.544       | 104535 |

|        |  |         |         |        |
|--------|--|---------|---------|--------|
| Totals |  | 5180743 | 100.000 | 217218 |
|--------|--|---------|---------|--------|

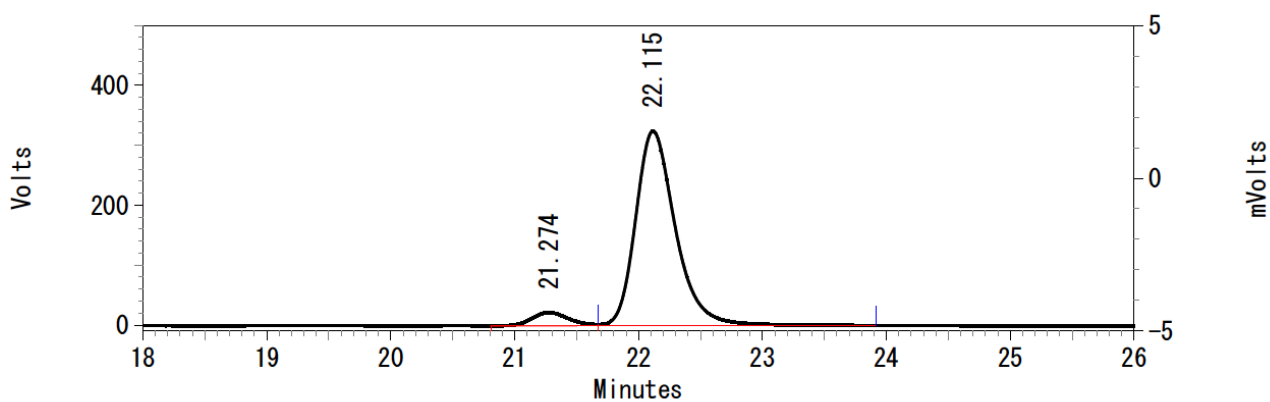

**UV-970 Results**

| Pk # | Retention Time | Area    | Area Percent | Height |
|------|----------------|---------|--------------|--------|
| 1    | 21.274         | 449924  | 5.836        | 22231  |
| 2    | 22.115         | 7259271 | 94.164       | 324859 |

|        |  |         |         |        |
|--------|--|---------|---------|--------|
| Totals |  | 7709195 | 100.000 | 347090 |
|--------|--|---------|---------|--------|

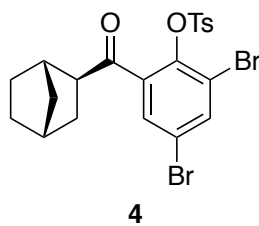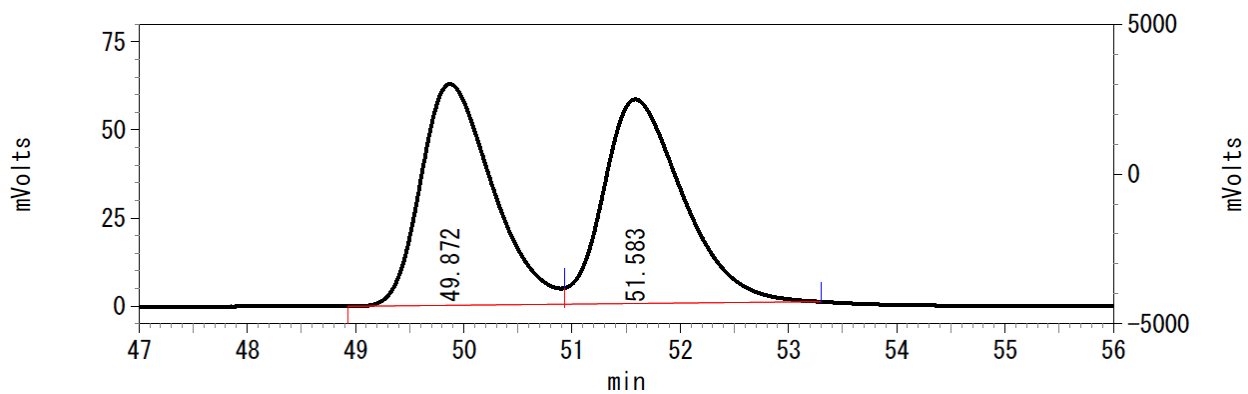

| Pk # | Retention Time | Area    | Area Percent |
|------|----------------|---------|--------------|
| 1    | 49.872         | 2907422 | 49.623       |
| 2    | 51.583         | 2951609 | 50.377       |

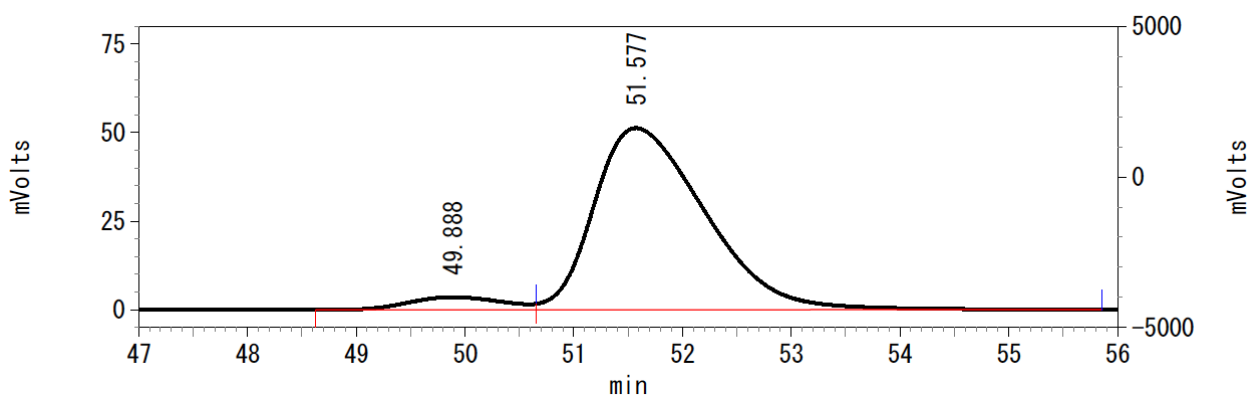

| Pk # | Retention Time | Area    | Area Percent |
|------|----------------|---------|--------------|
| 1    | 49.888         | 218535  | 5.657        |
| 2    | 51.577         | 3644735 | 94.343       |
